# Supplementary material for: Synthesis of Mixed Dinucleotides by Mechanochemistry
Source: MDPI journal article supplement (doi:10.3390/molecules27103229), 2022-05-18
Supplement: s1 [file s1]

## Supplementary material

### Synthesis of mixed dinucleotides by mechanochemistry

Faisal Hayat <sup>1</sup>, Mikhail V. Makarov <sup>1</sup>, Luxene Belfleur <sup>1</sup> and Marie E. Migaud <sup>1,\*</sup>

<sup>1</sup> Mitchell Cancer Institute, Department of Pharmacology, College of Medicine, University of South Alabama, 1660 Springhill Avenue, Mobile, AL 36604, USA; [fhayat@southalabama.edu](mailto:fhayat@southalabama.edu), [lbelfleur@southalabama.edu](mailto:lbelfleur@southalabama.edu), [mimak78@gmail.com](mailto:mimak78@gmail.com);

\* Correspondence: [mmigaud@southalabama.edu](mailto:mmigaud@southalabama.edu);

ADENOSINE-POCl<sub>3</sub>-30MIN BALLMILLING  
 PROTON D<sub>2</sub>O {C:\Bruker\TopSpin3.5pl6} FH 2

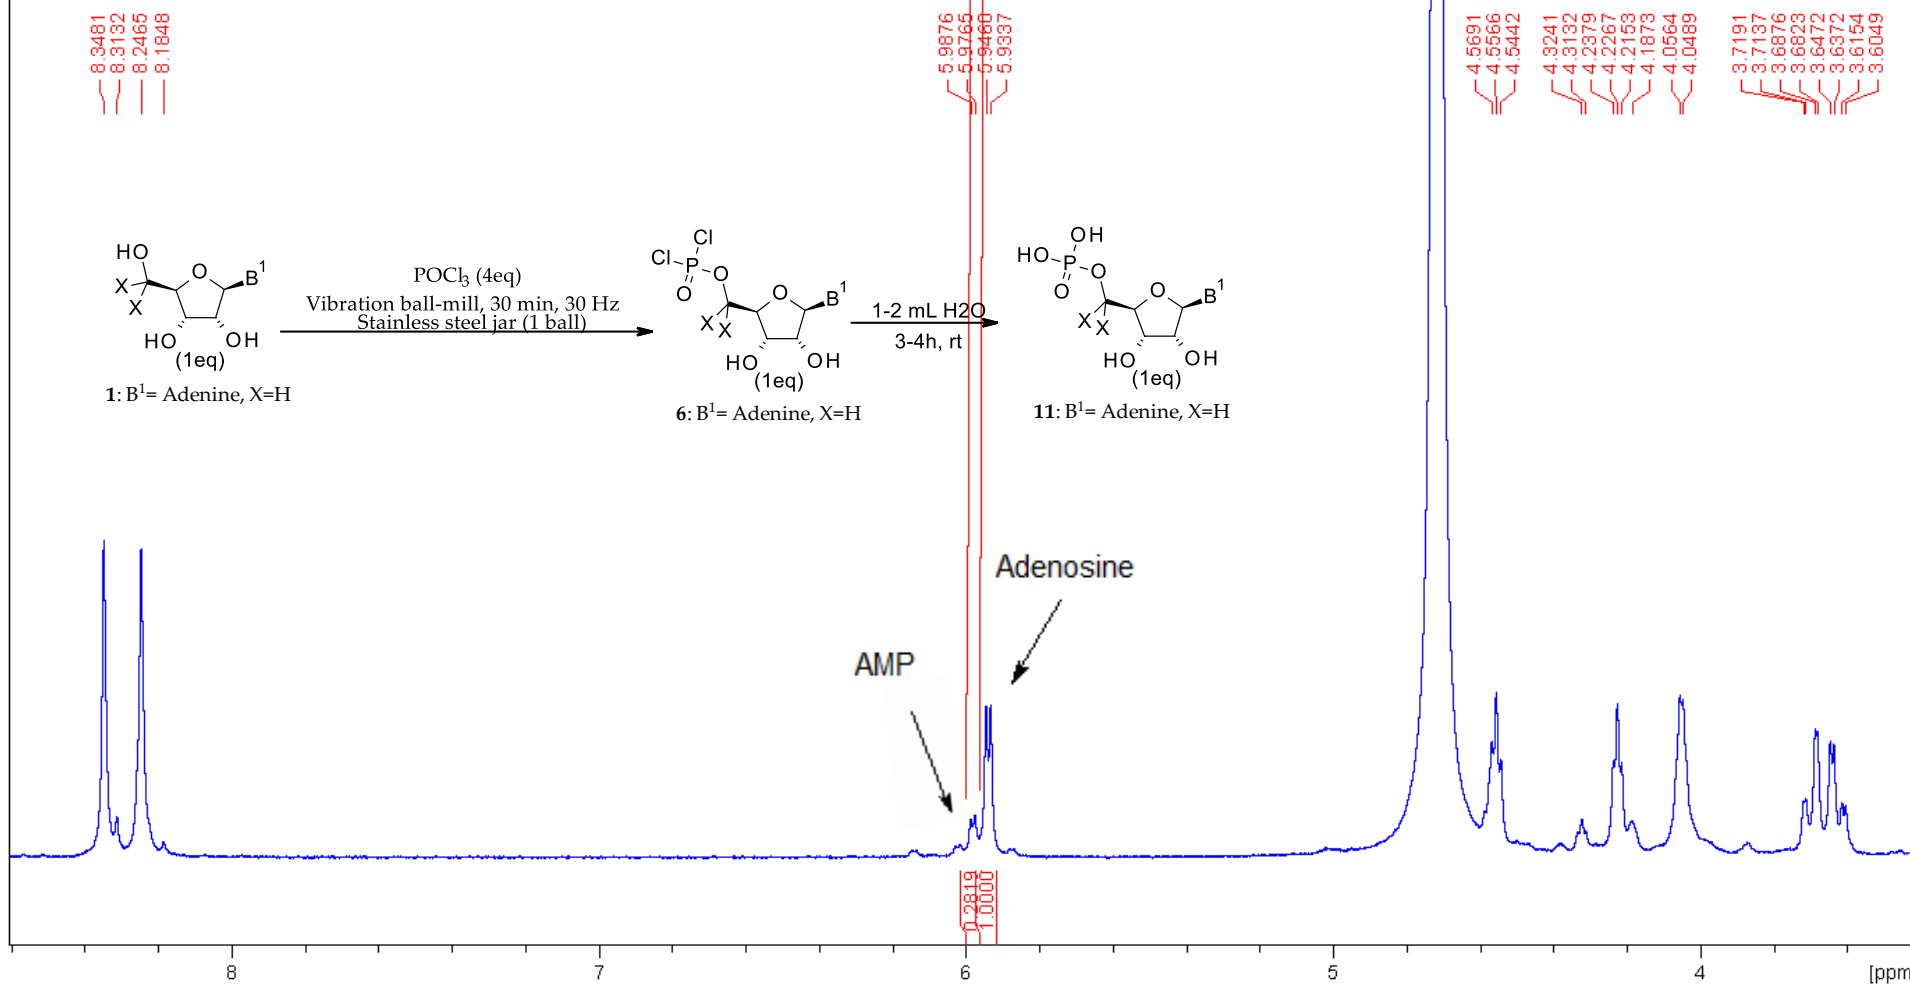

**Compound 11:** <sup>1</sup>H-NMR of crude product after 30 minutes of ball-milling (D<sub>2</sub>O)

PROTON D2O {C:\Bruker\TopSpin3.5pl6} FH 3

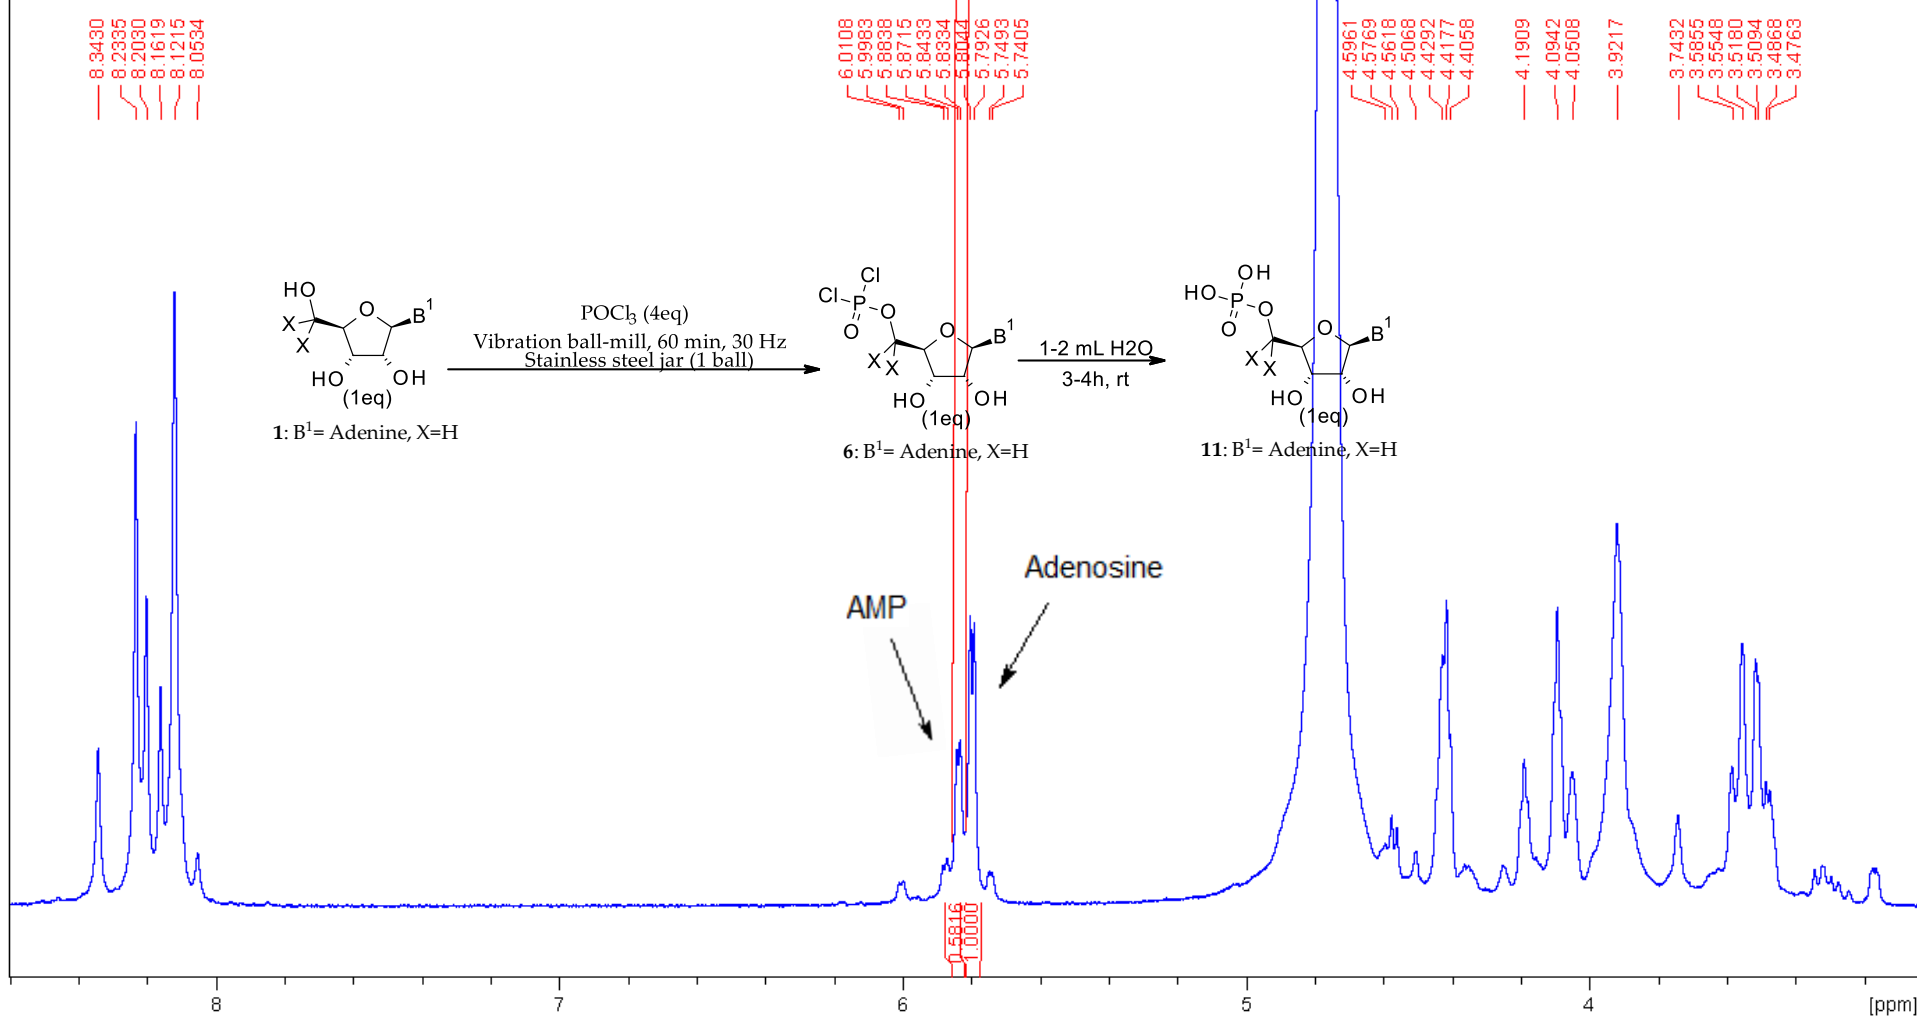

Compound 11: <sup>1</sup>H-NMR of crude product after 1 hour of ball-milling (D<sub>2</sub>O)

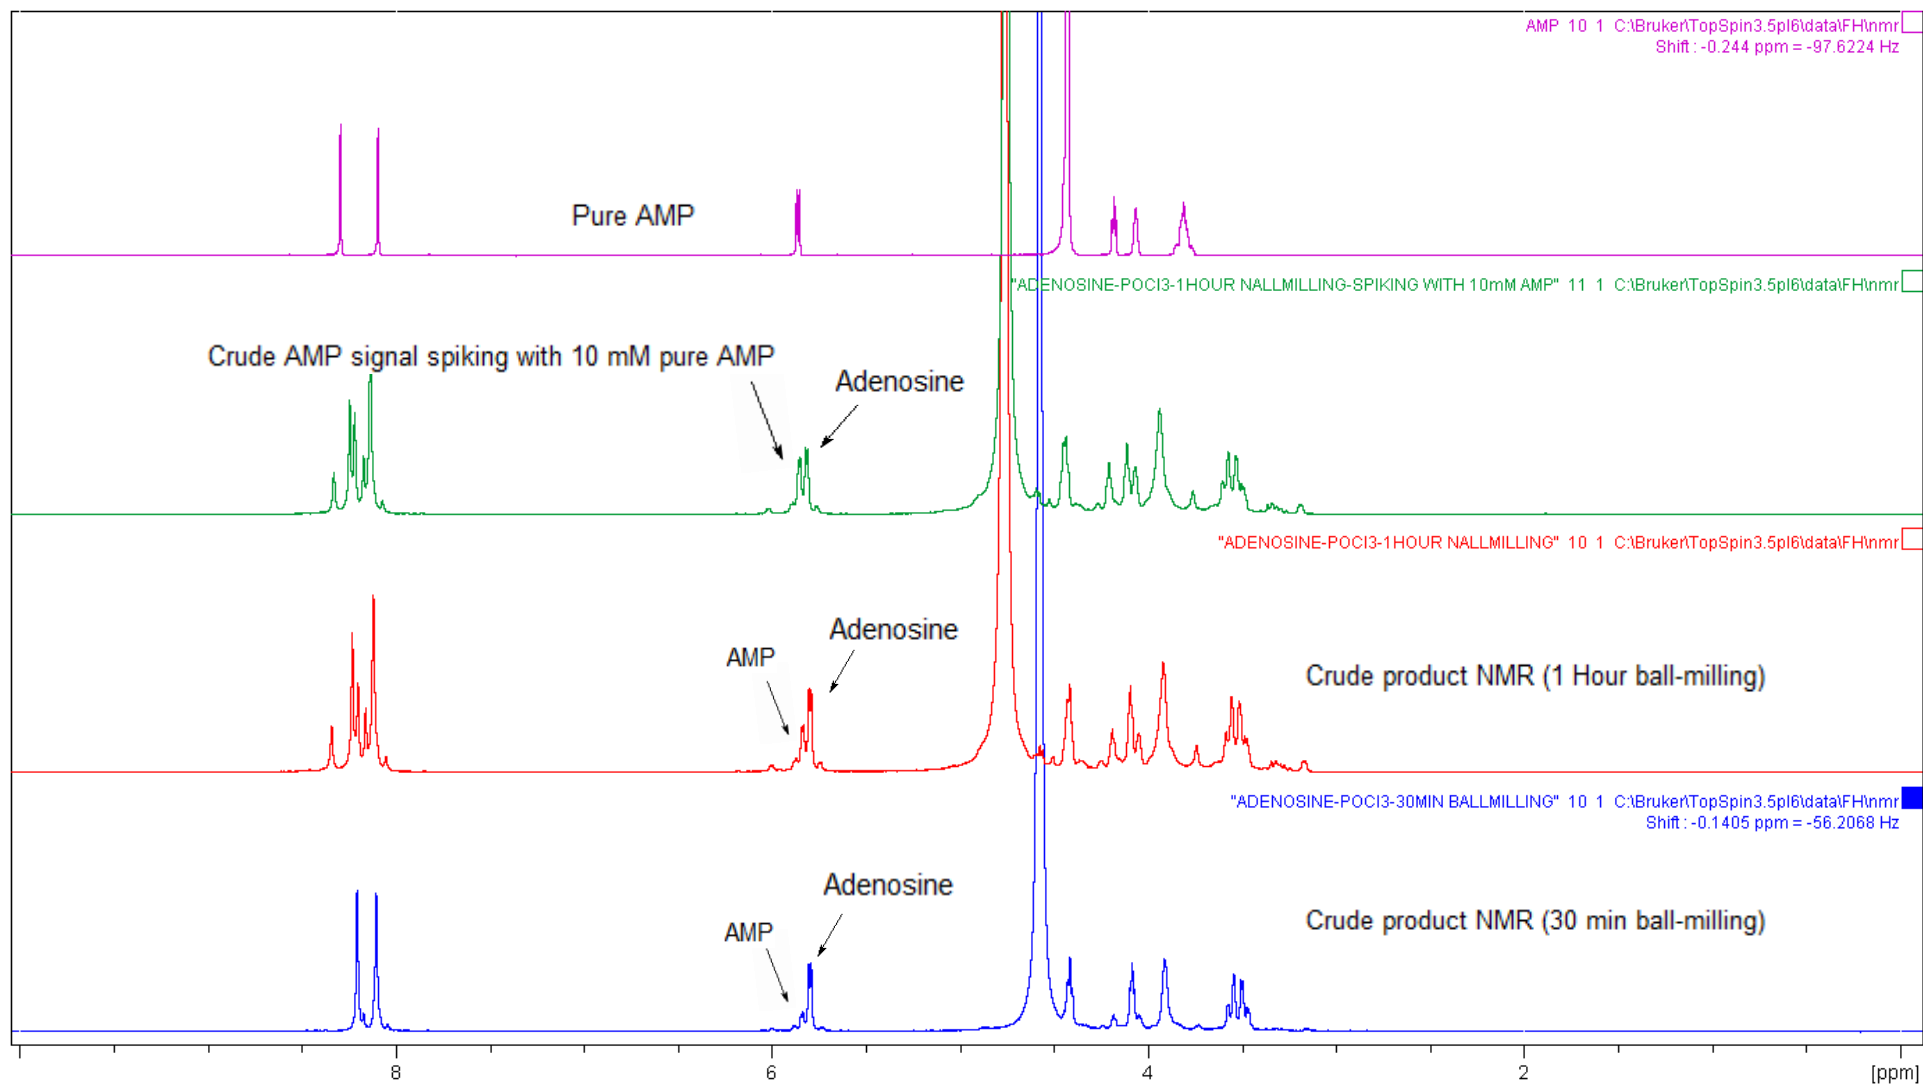

**Compound 11:** AMP Signals from a one-hour ball-milling crude product spiked with 10 mM pure AMP ( $\text{D}_2\text{O}$ )

NR-POCl3-30MIN BALLMILLING  
 PROTON D2O {C:\Bruker\TopSpin3.5\pl6} FH 4

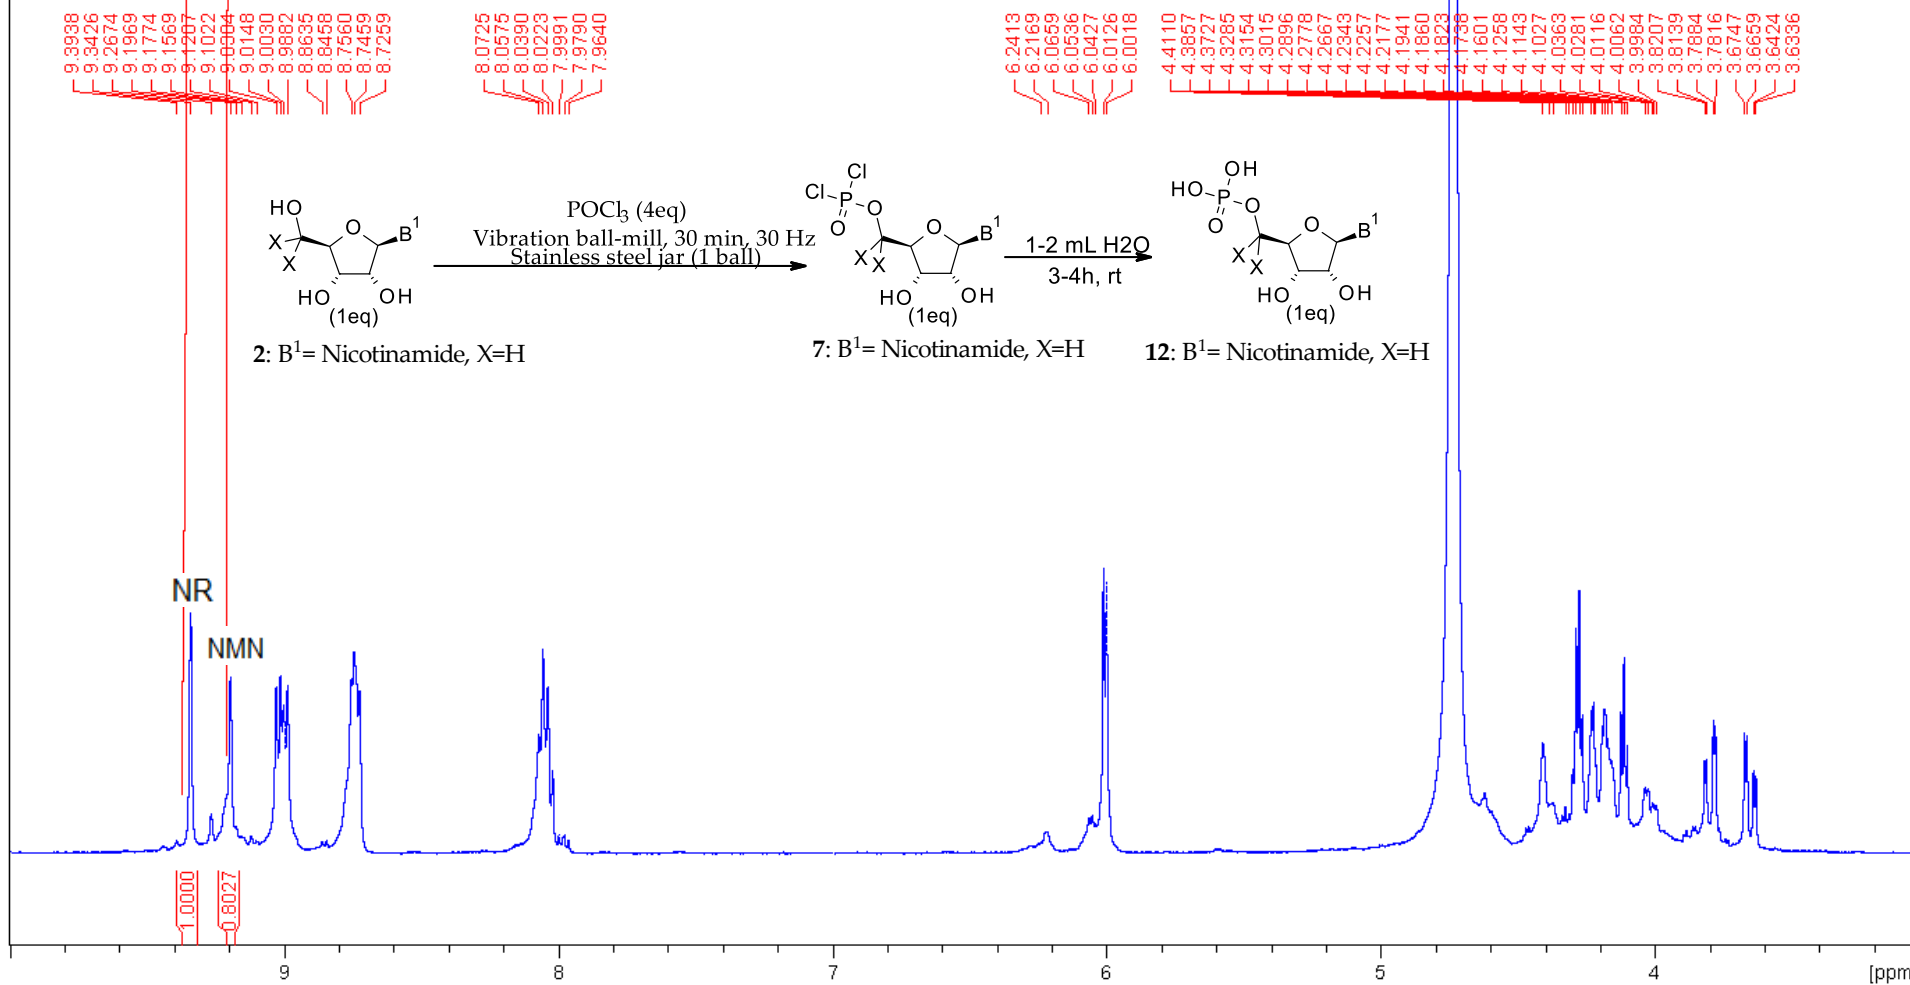

**Compound 12:** <sup>1</sup>H-NMR of crude product after 30 minutes of ball-milling (D<sub>2</sub>O)

NR-POCl<sub>3</sub>-1HOUR BALLMILLING  
 PROTON D2O {C:\Bruker\TopSpin3.5pl6} FH 5

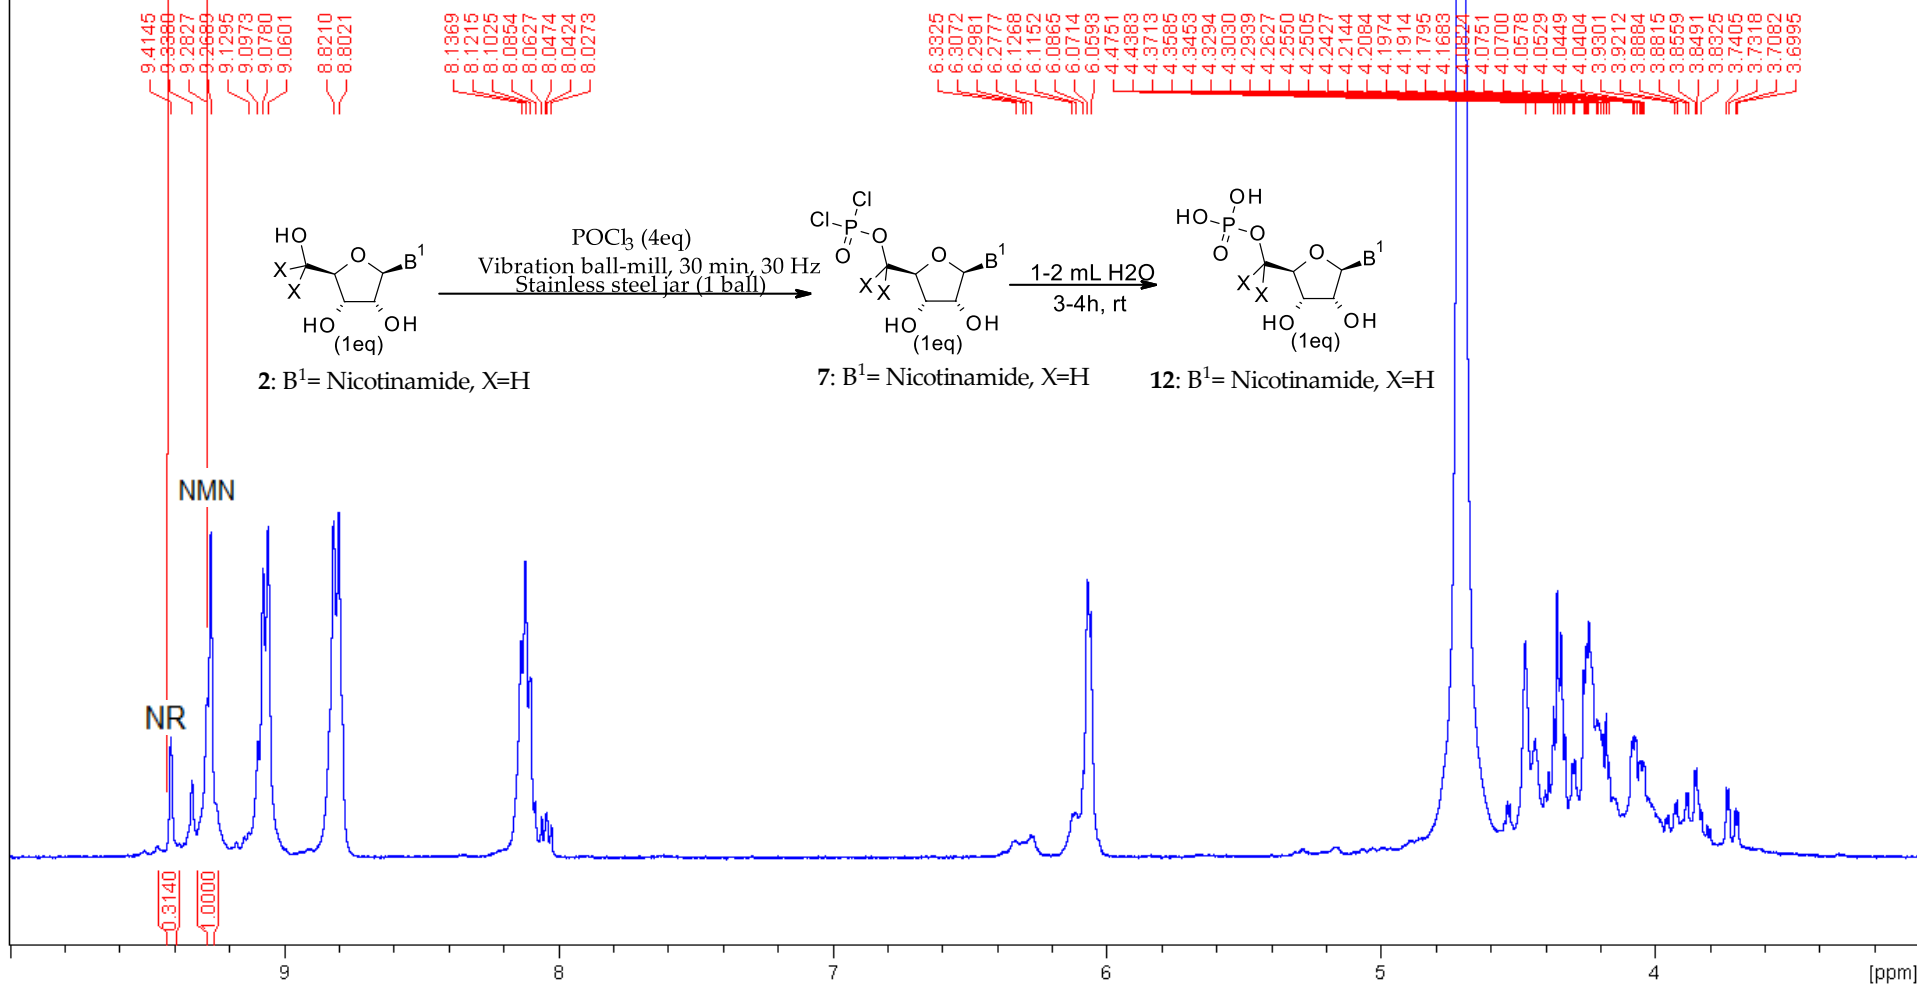

Compound 12: <sup>1</sup>H-NMR of crude product after 1 hour of ball-milling (D<sub>2</sub>O)

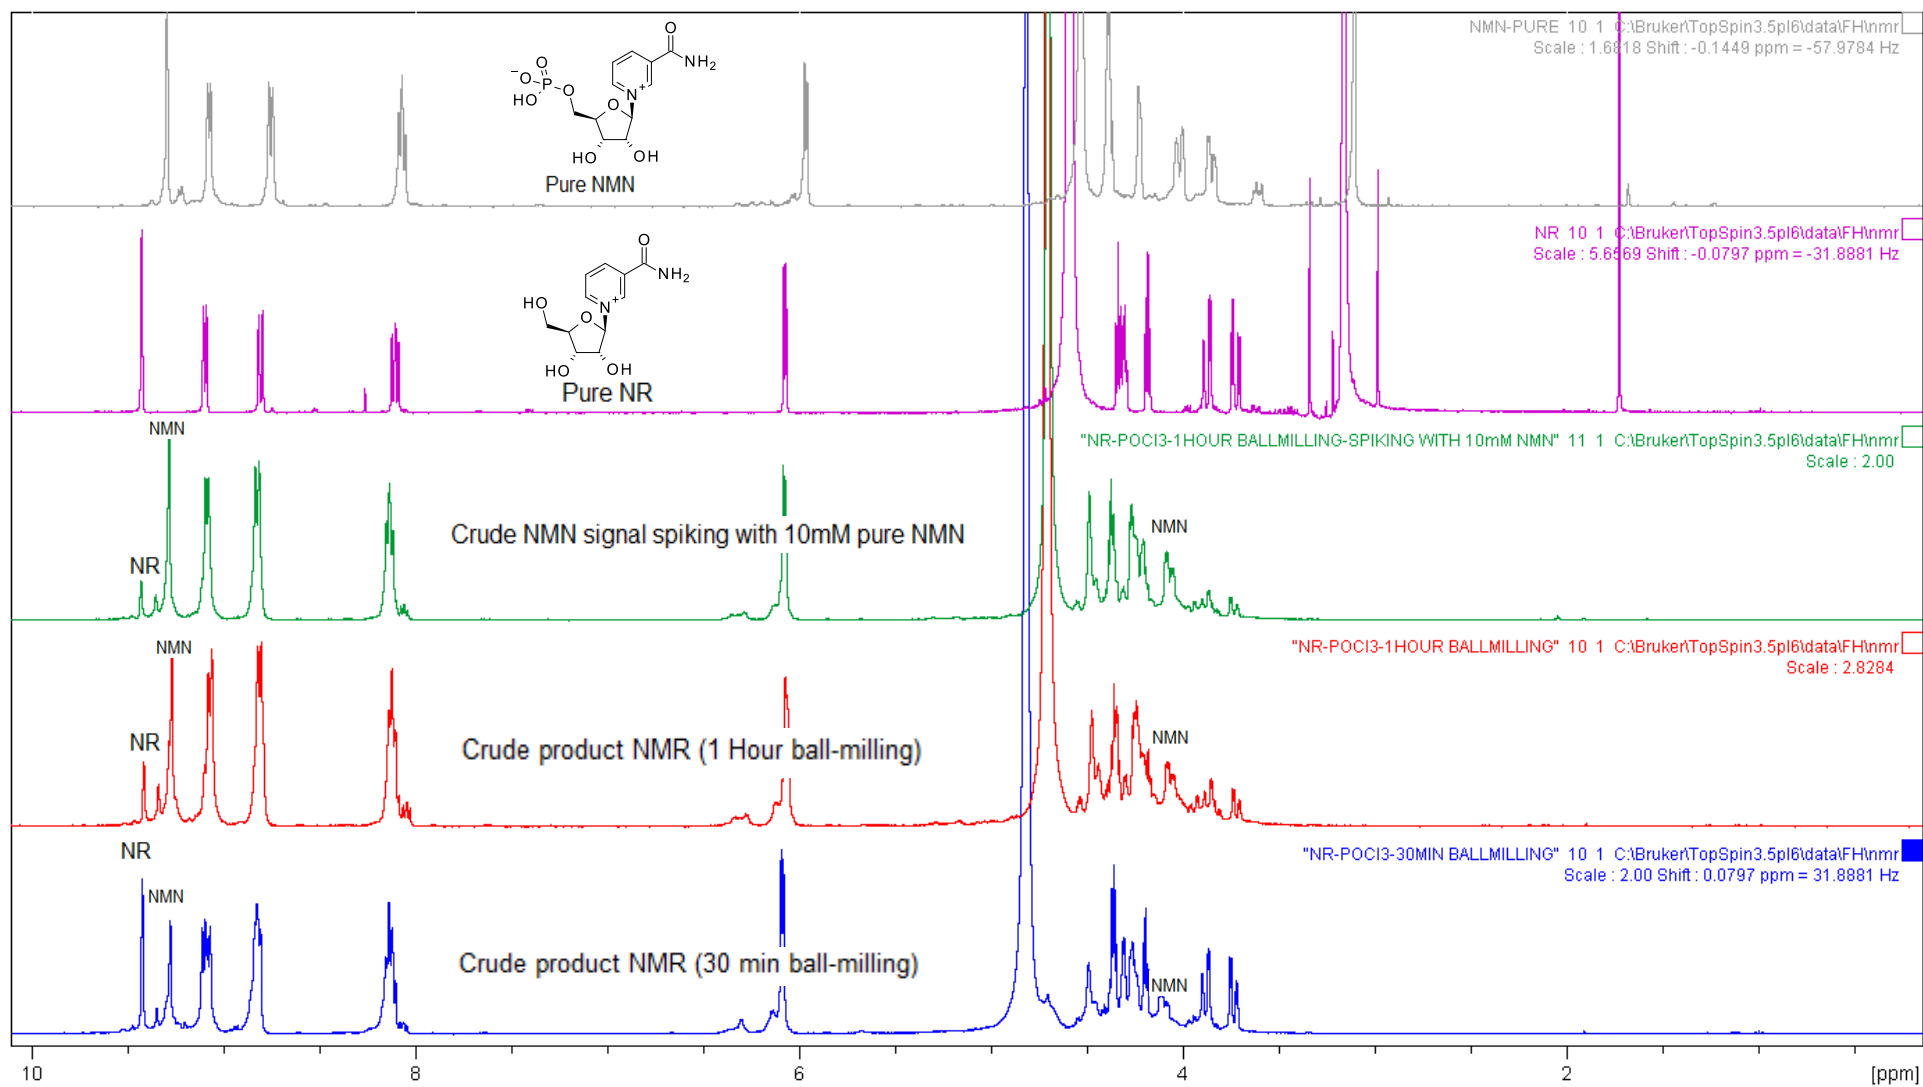

**Compound 12:** NMN Signals from a one-hour ball-milling crude product spiked with 10 mM pure NMN (D<sub>2</sub>O)

4PYR-POCl<sub>3</sub>-30MIN BALLMILLING  
 PROTON D2O {C:\Bruker\TopSpin3.5pl6} FH 6

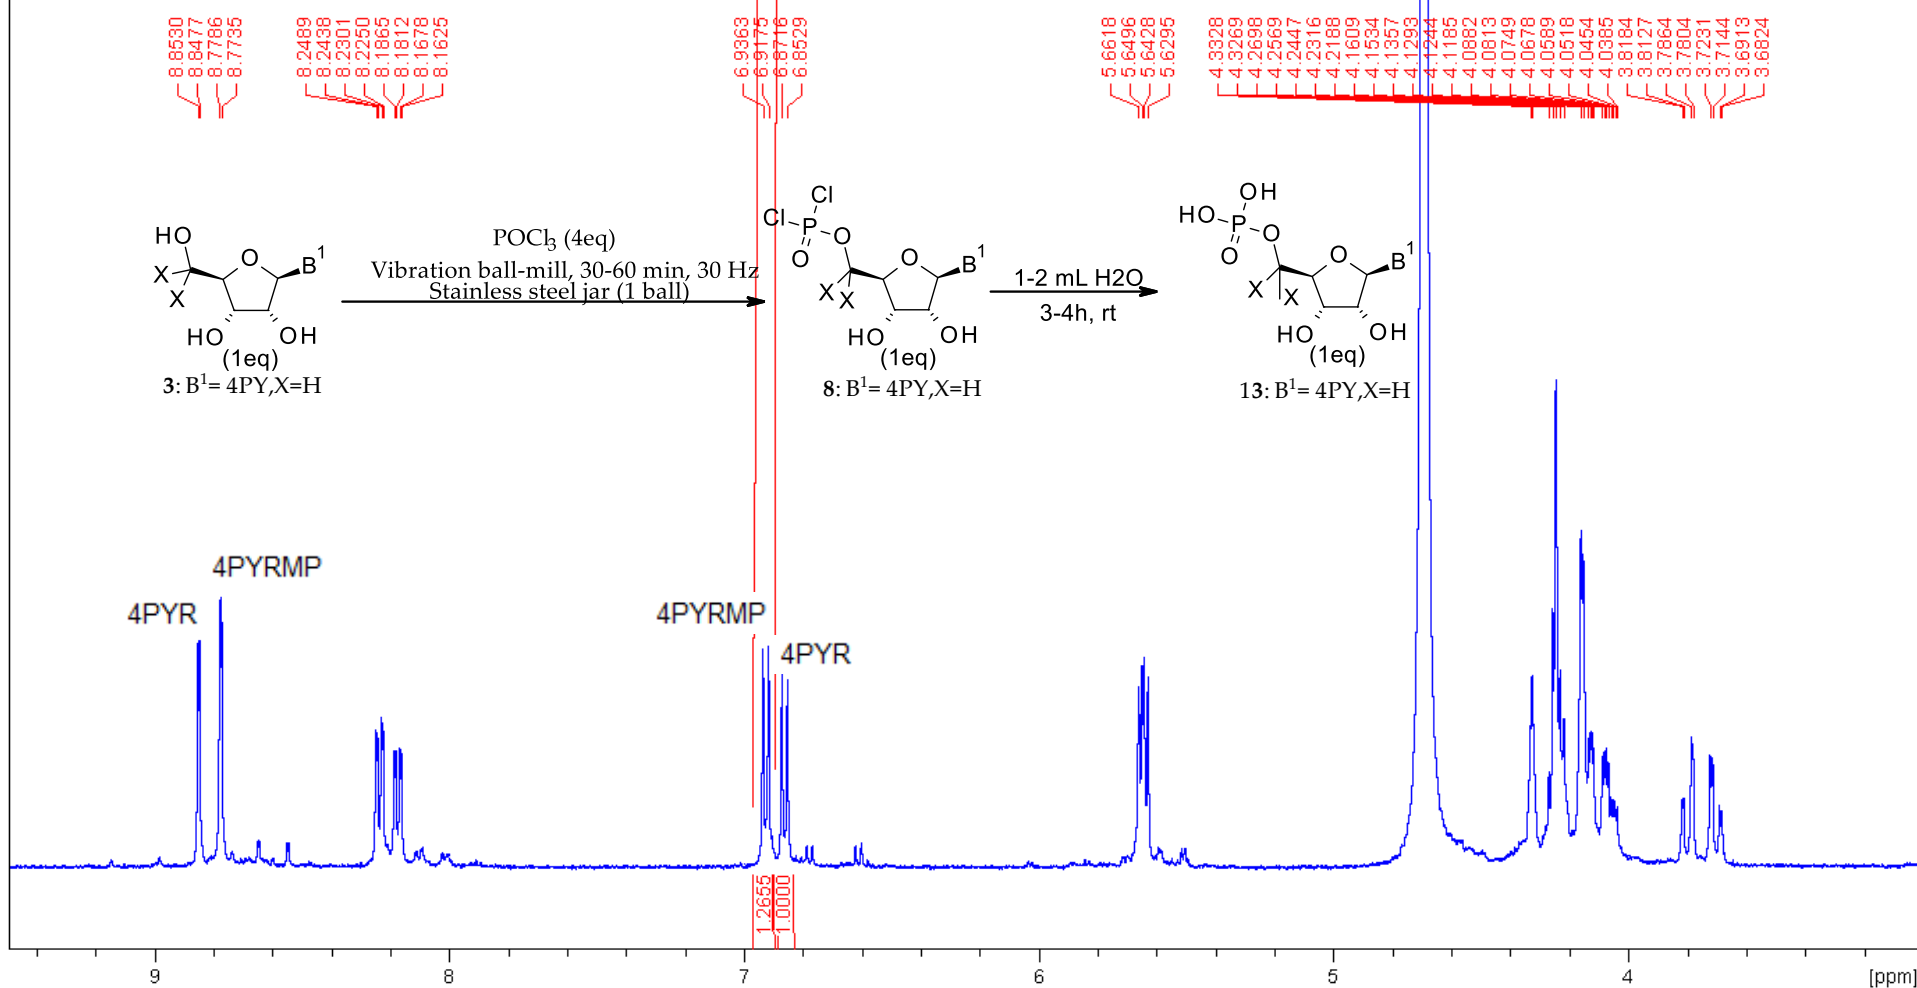

**Compound 13:** <sup>1</sup>H-NMR of crude product after 30 minutes of ball-milling (D<sub>2</sub>O)



4PYR-POCl<sub>3</sub>-1HOUR BALLMILLING  
 PROTON D<sub>2</sub>O {C:\Bruker\TopSpin3.5pl6} FH 7

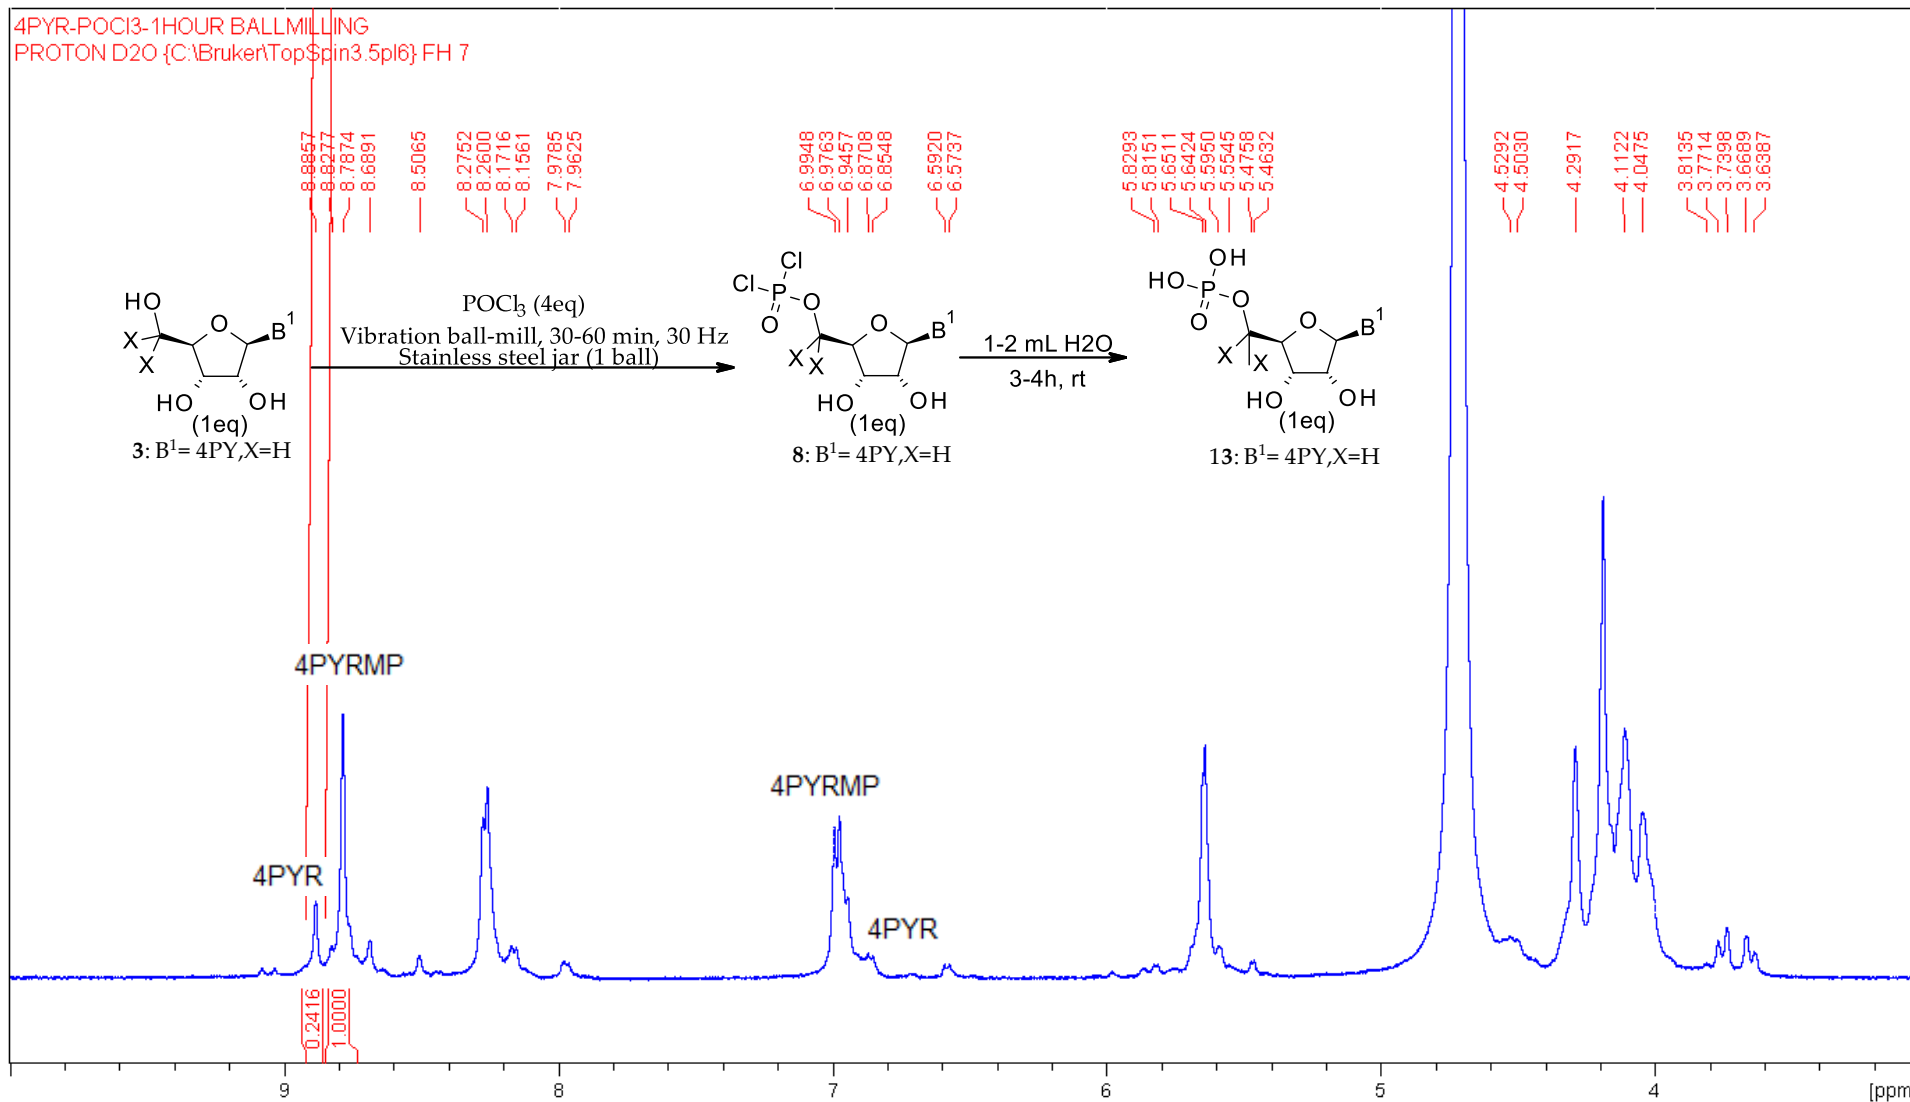

**Compound 13:** <sup>1</sup>H-NMR of crude product after 1 hour of ball-milling (D<sub>2</sub>O)

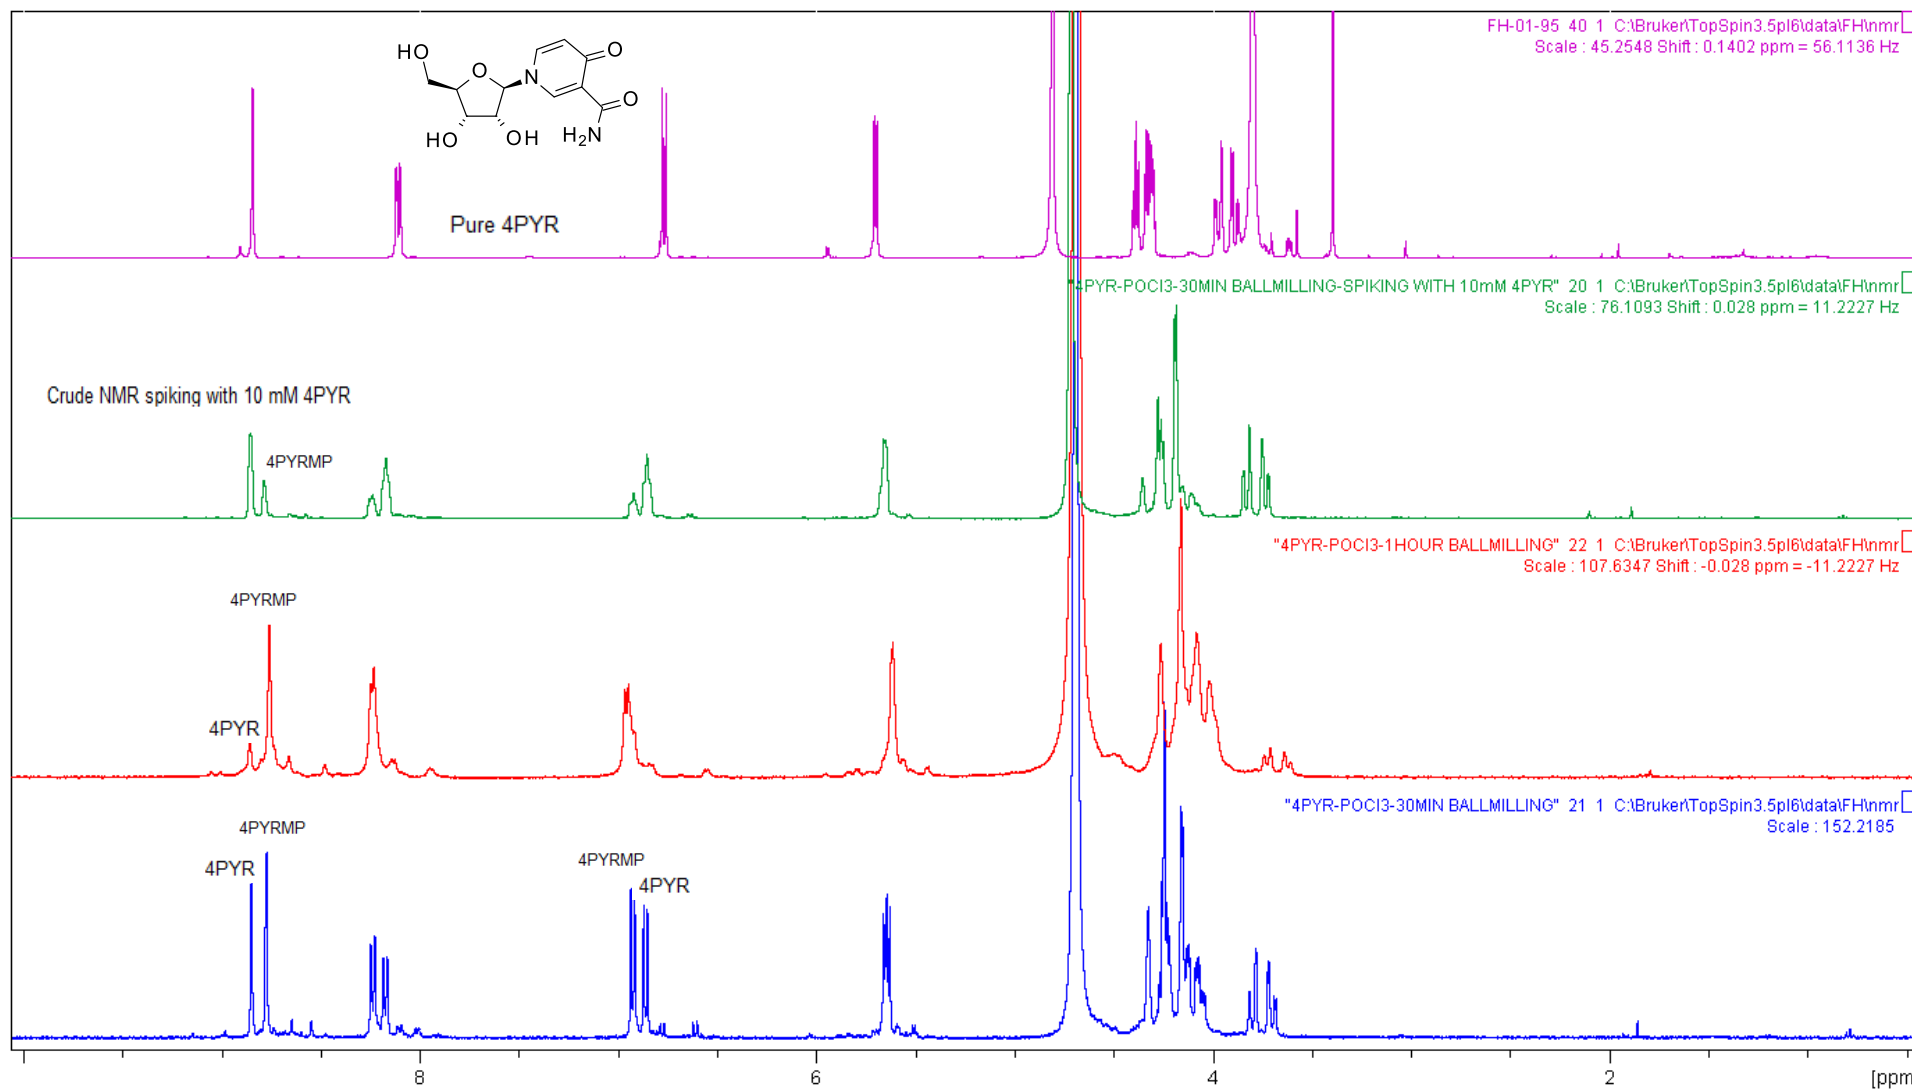

**Compound 13:** 4PYR Signals from a one-hour ball-milling crude product spiked with 10 mM pure 4PYR ( $\text{D}_2\text{O}$ )

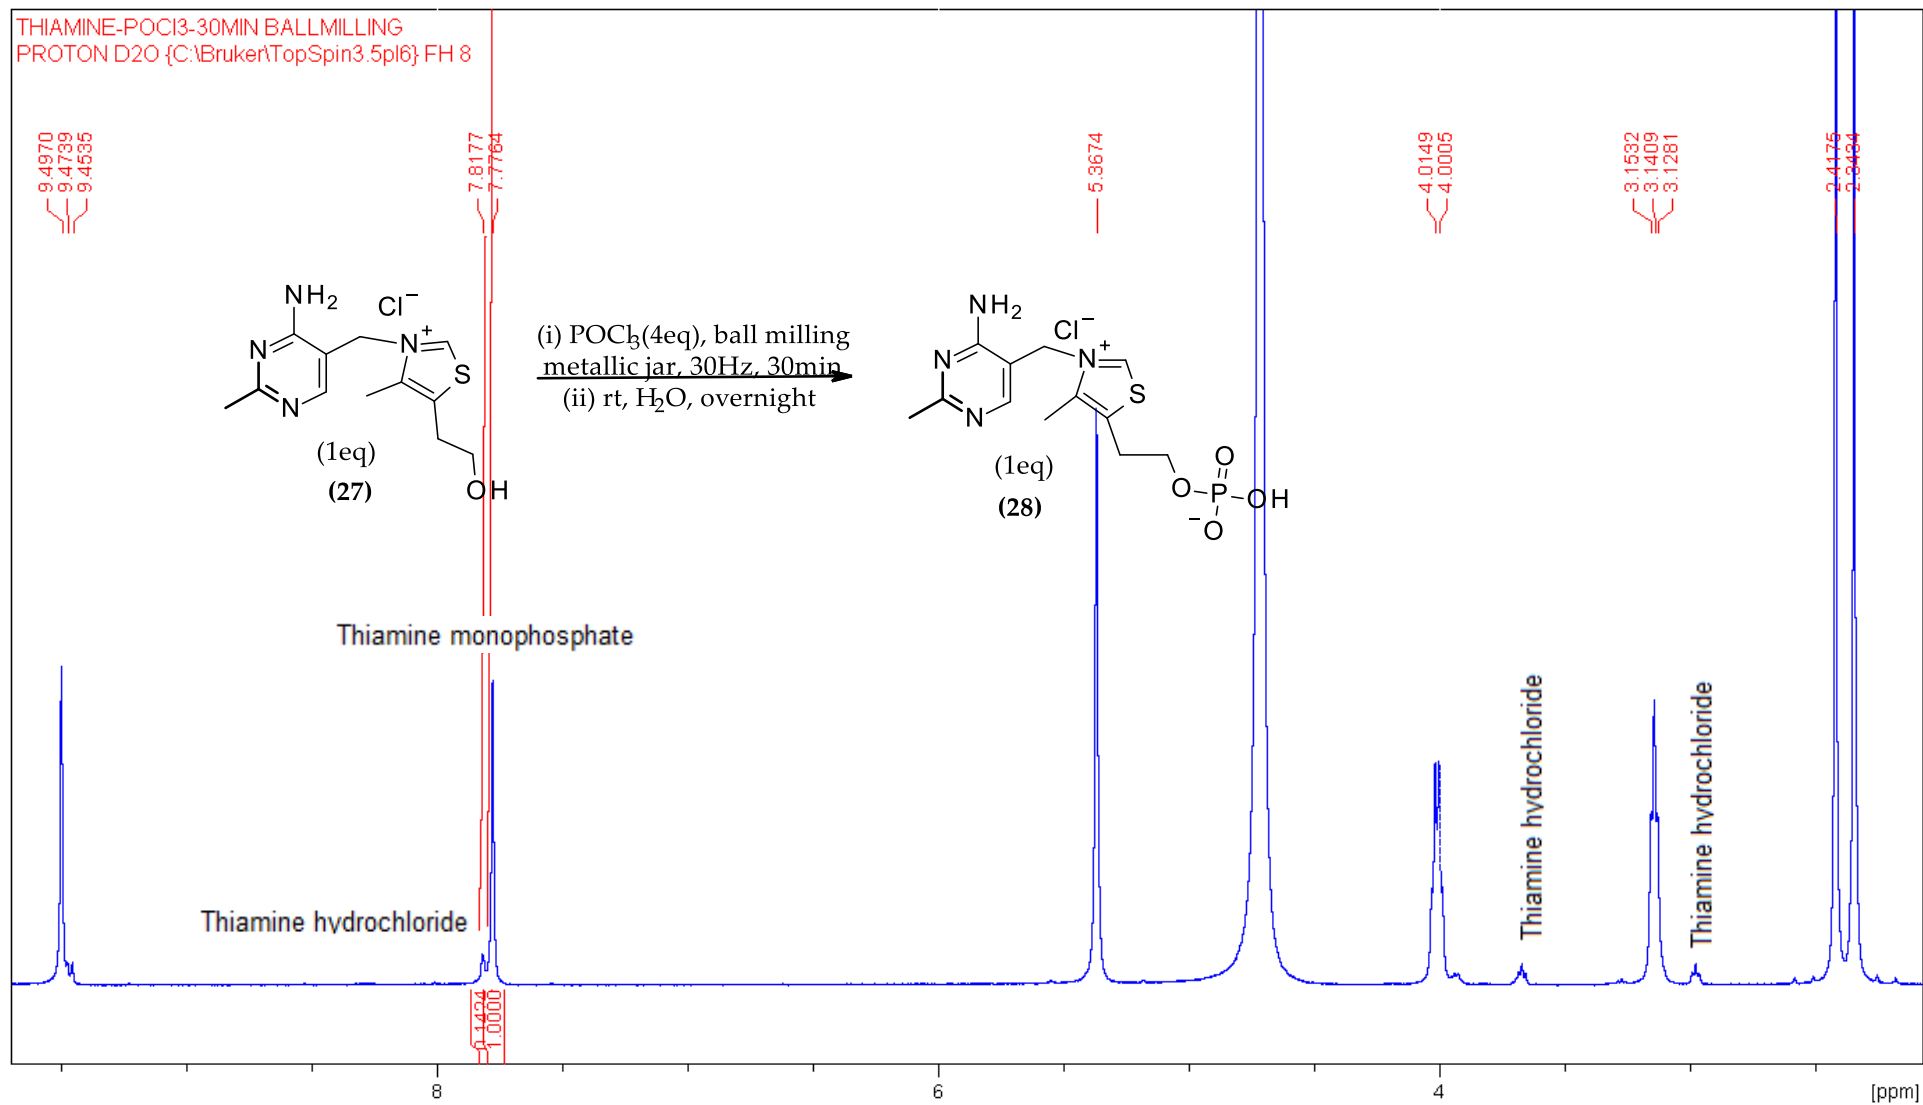

Compound 28: <sup>1</sup>H-NMR of crude product after 30 minutes of ball-milling (D<sub>2</sub>O)

THIAMINE-POCl<sub>3</sub>-1HOUR BALLMILLING  
 PROTON D<sub>2</sub>O {C:\Bruker\TopSpin3.5\pl6} FH 9

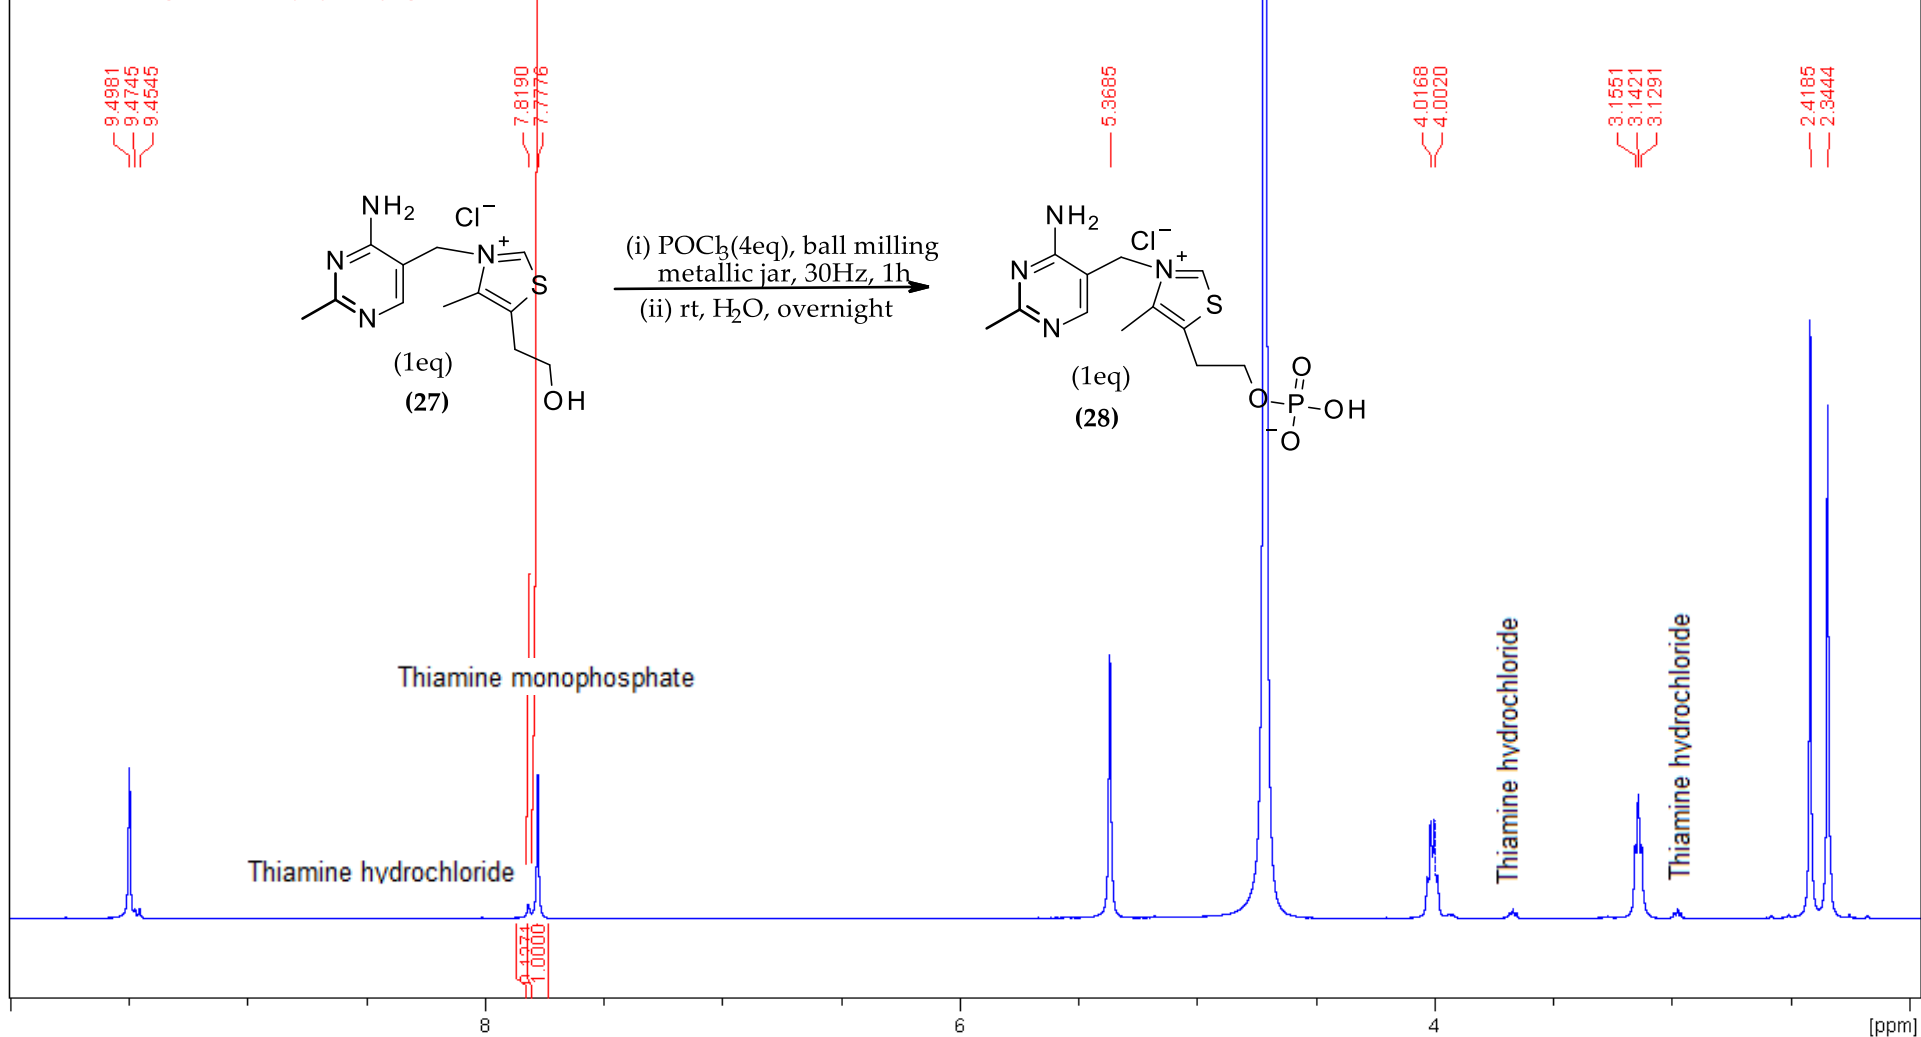

Compound 28: <sup>1</sup>H-NMR of crude product after 1 hour of ball-milling (D<sub>2</sub>O)

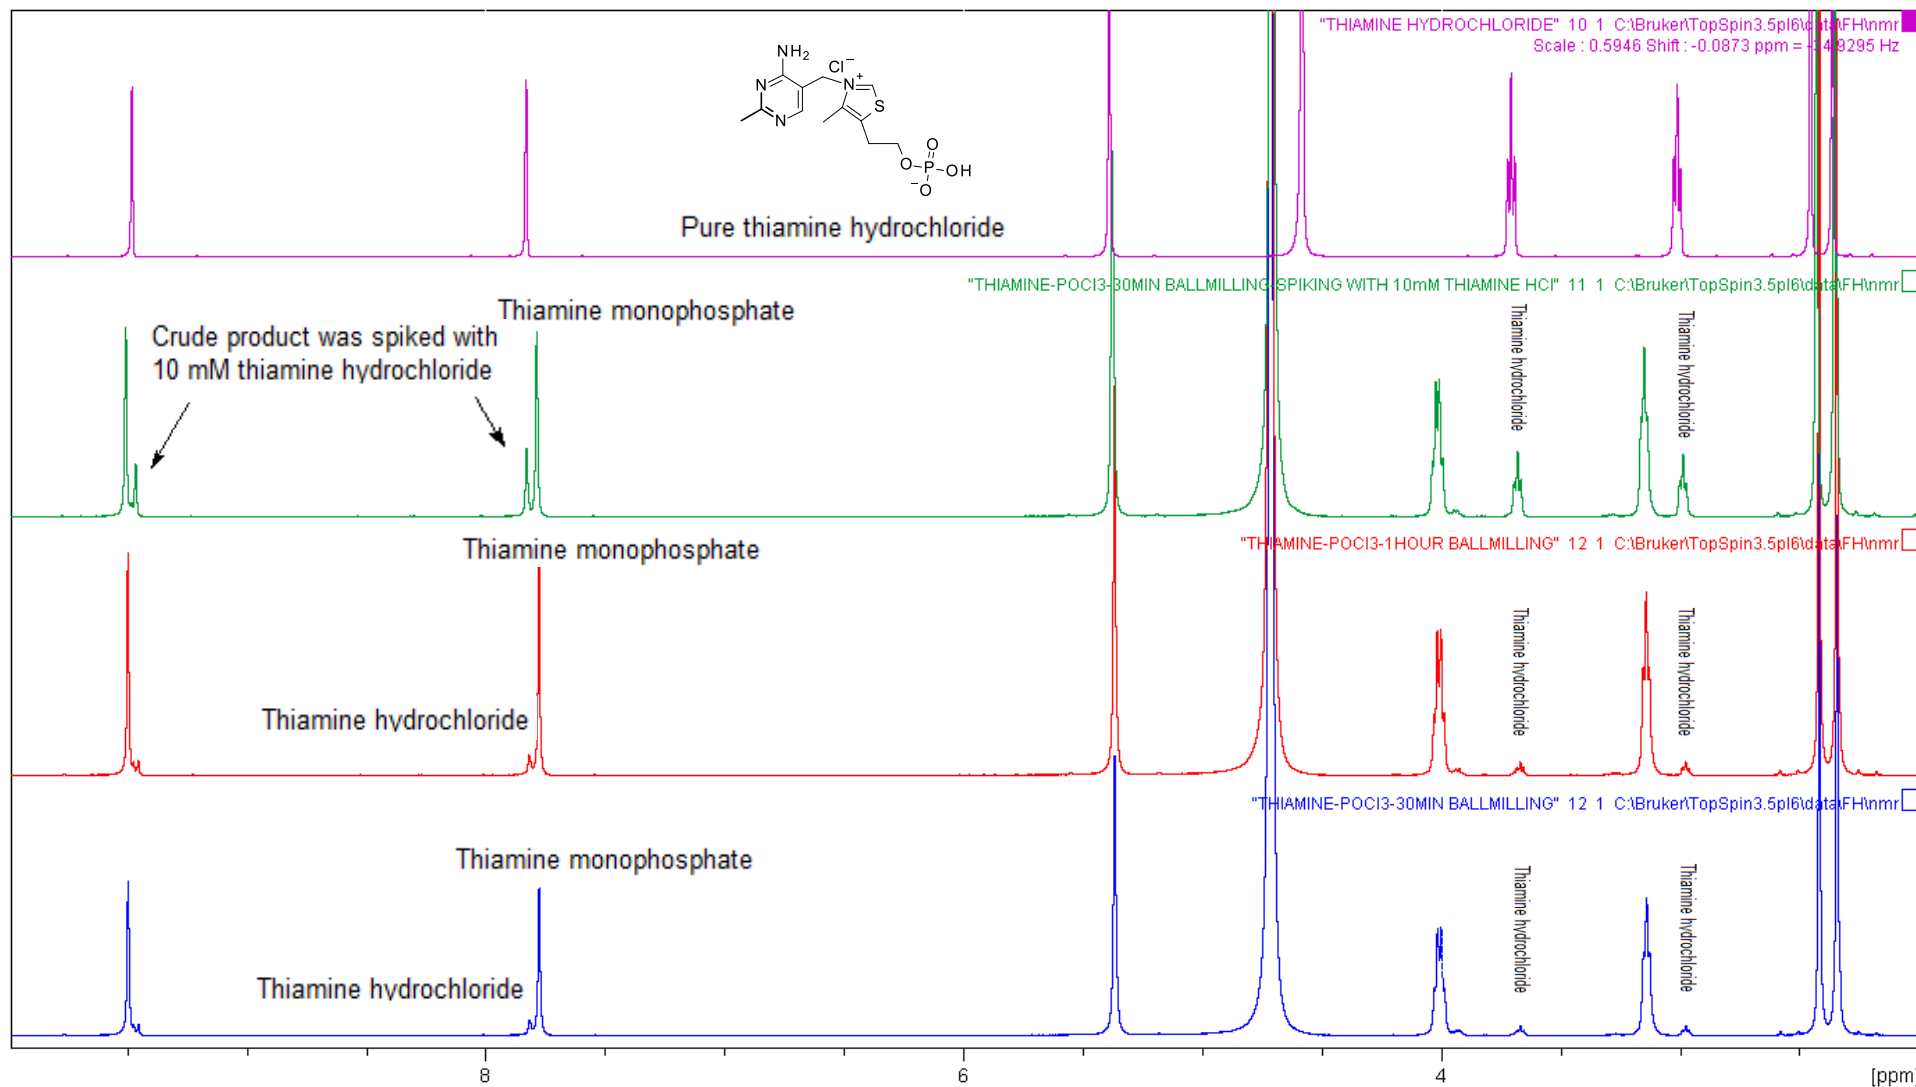

**Compound 28:** Thiamine Signals from a one-hour ball-milling crude product spiked with 10 mM pure thiamine hydrochloride ( $\text{D}_2\text{O}$ )

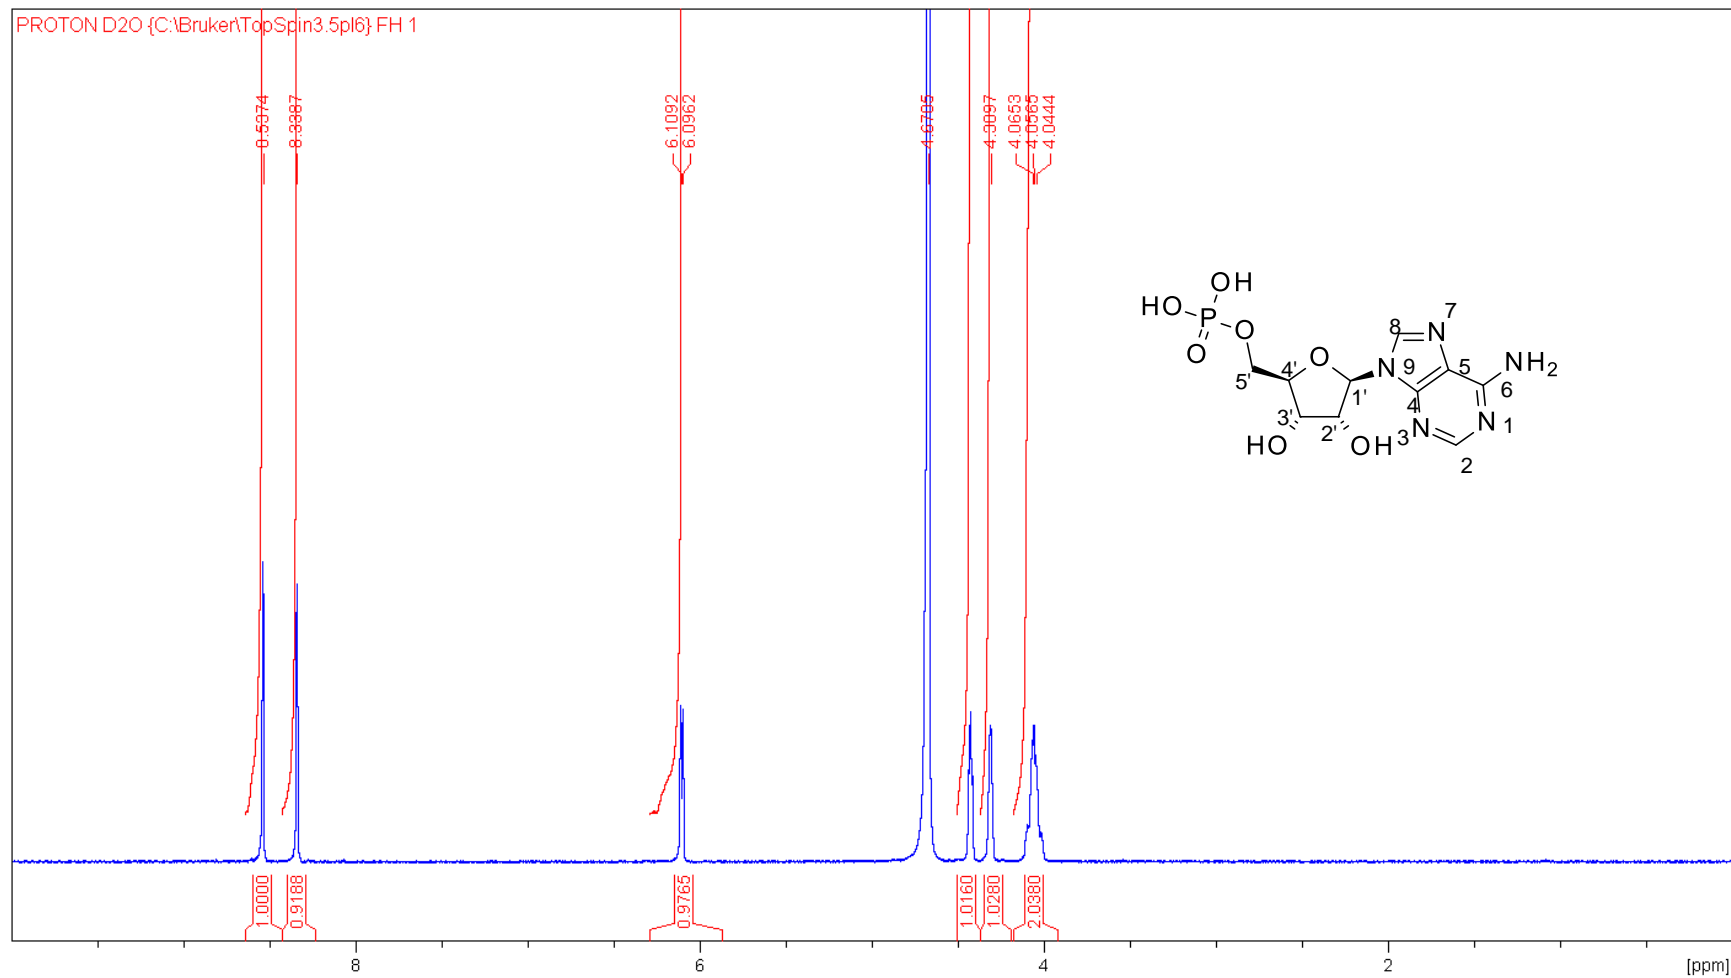

**Compound 11.** 400 MHz  $^1\text{H}$  NMR spectrum in  $\text{D}_2\text{O}$

ADENOSINE MONOPHOSPHATE

C13CPD D2O {C:\Bruker\TopSpin3.5pl6} FH 1

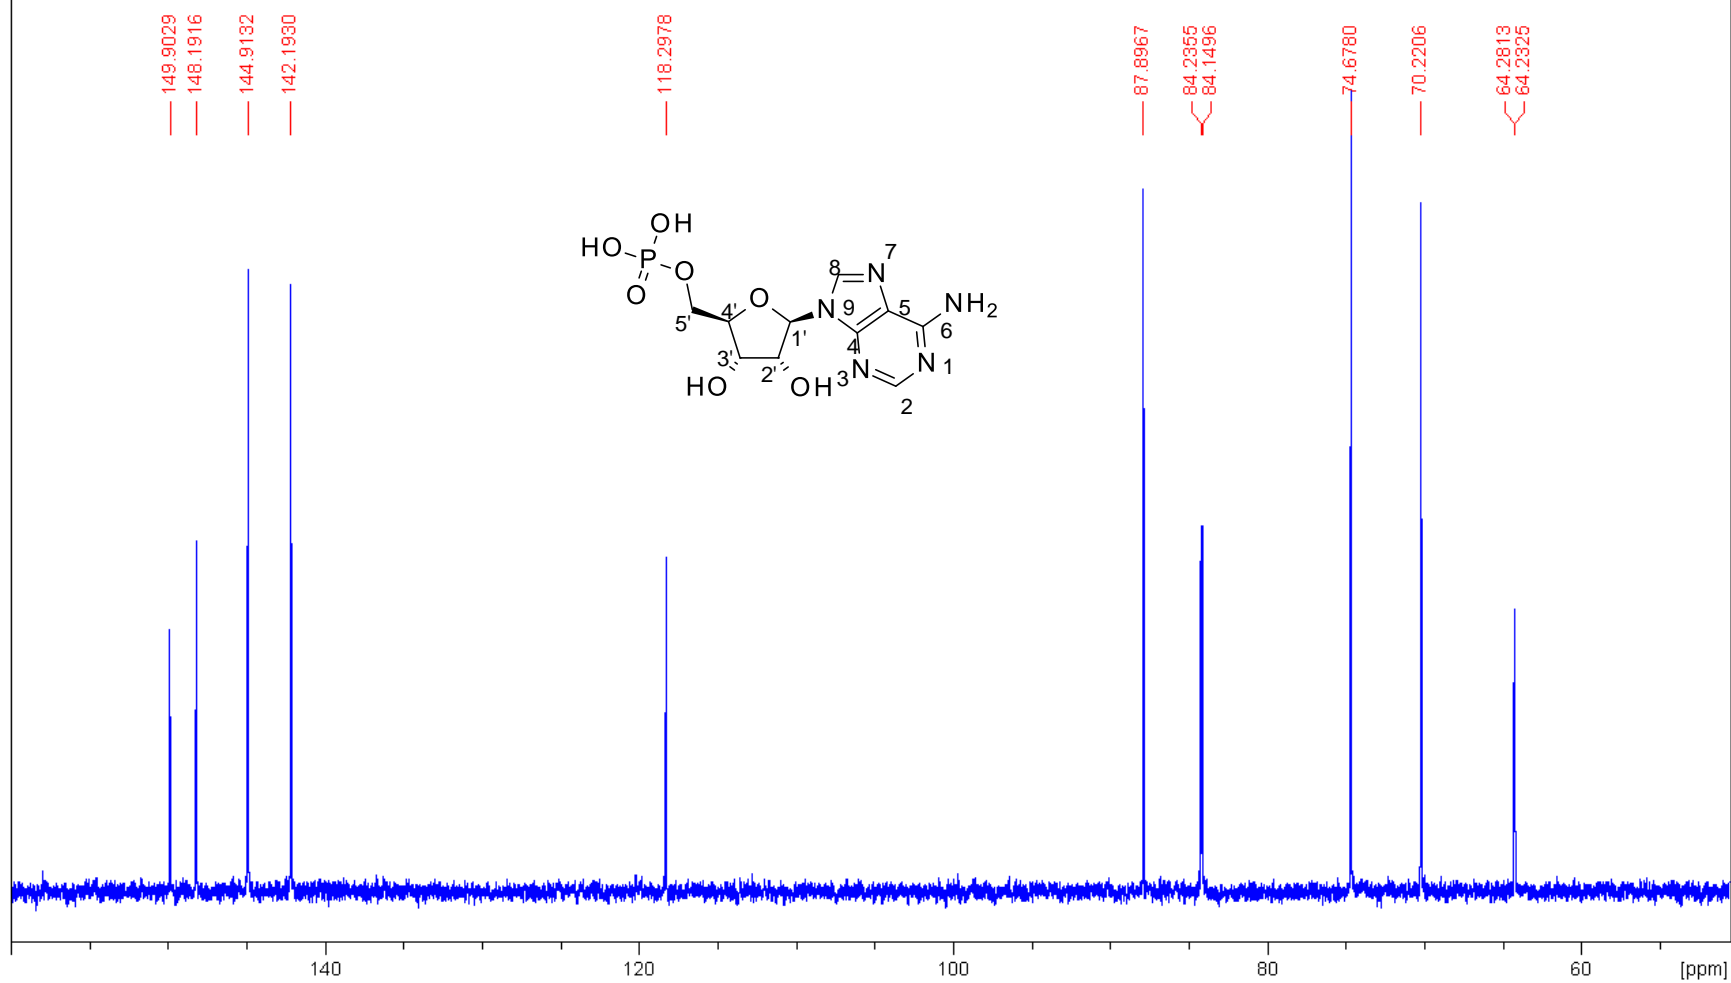

Compound 11. 100 MHz  $^{13}\text{C}$  NMR spectrum in  $\text{D}_2\text{O}$

P31 D2O {C:\Bruker\TopSpin3.5\pl6} FH 1

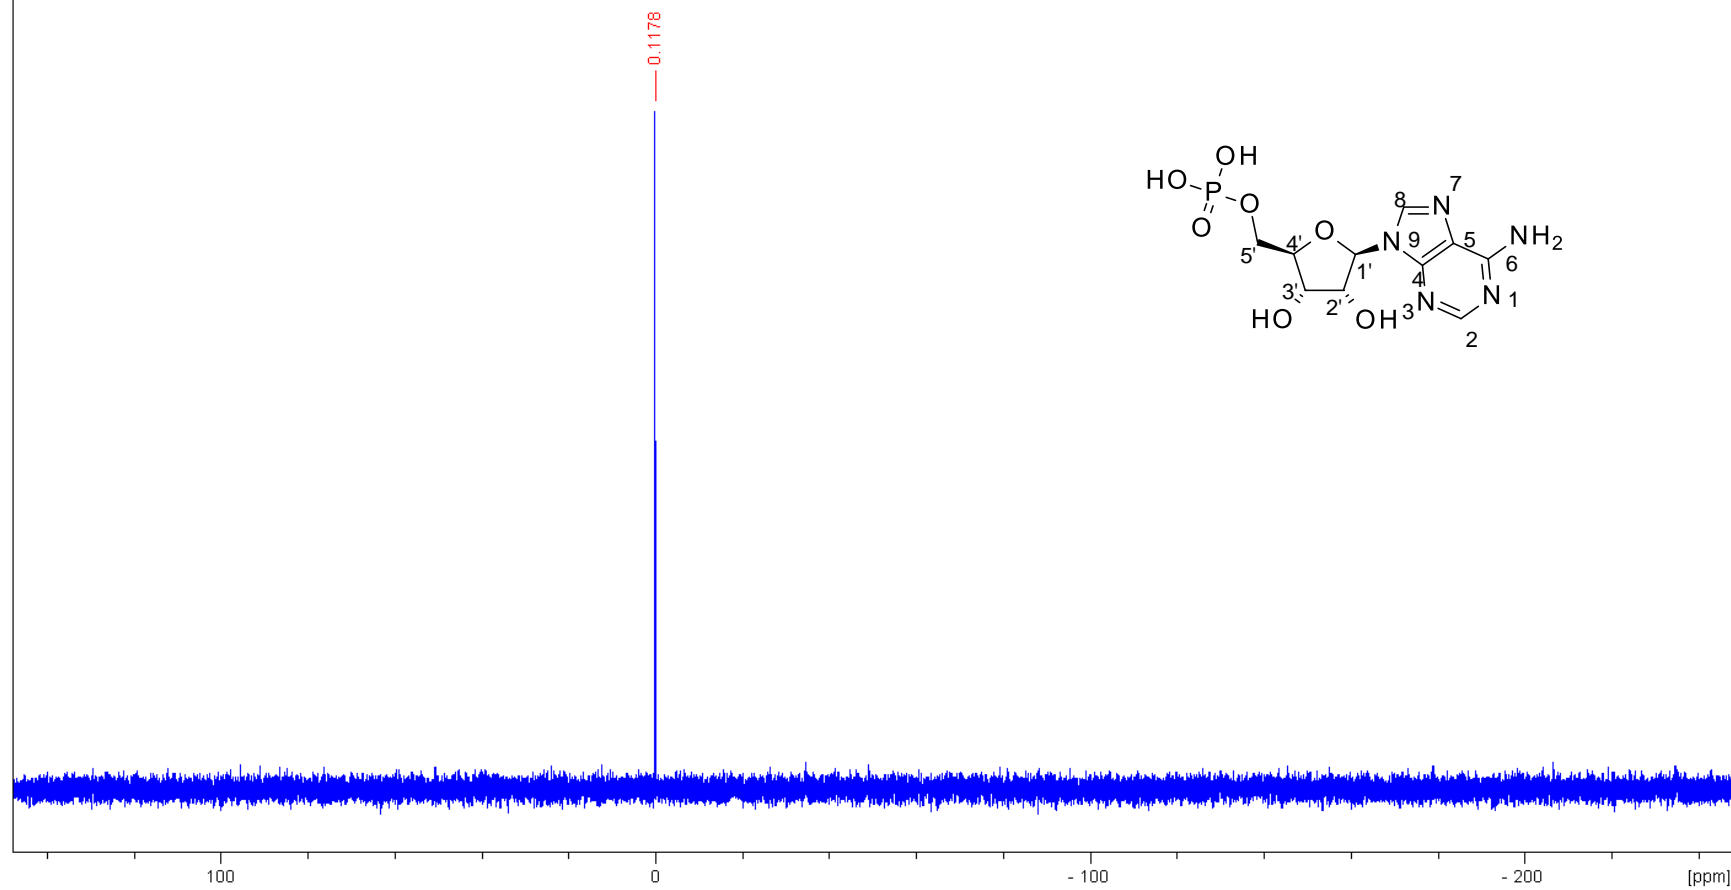

**Compound 11.** 162 MHz  $^{31}\text{P}$ NMR spectrum in  $\text{D}_2\text{O}$



PROTON D2O {C:\Bruker\TopSpin3.5pl6} FH 22

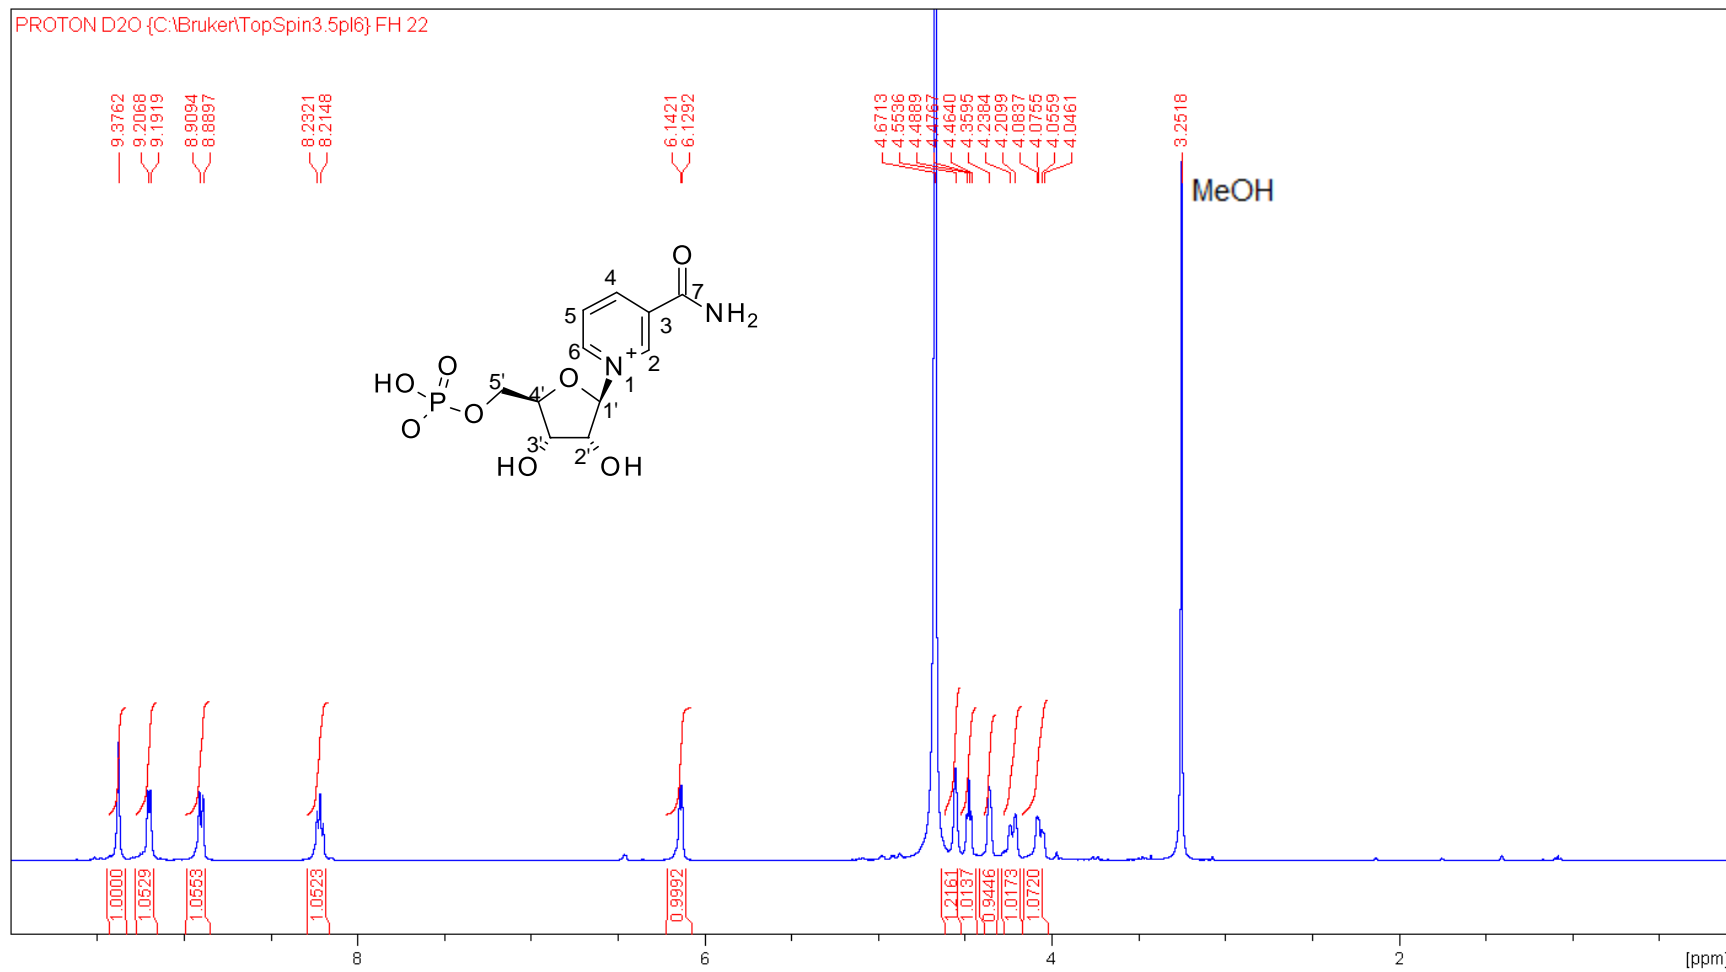

Compound 12. 400 MHz  $^1\text{H}$  NMR spectrum in  $\text{D}_2\text{O}$

P31 D2O {C:\Bruker\TopSpin3.5pl6} FH 22

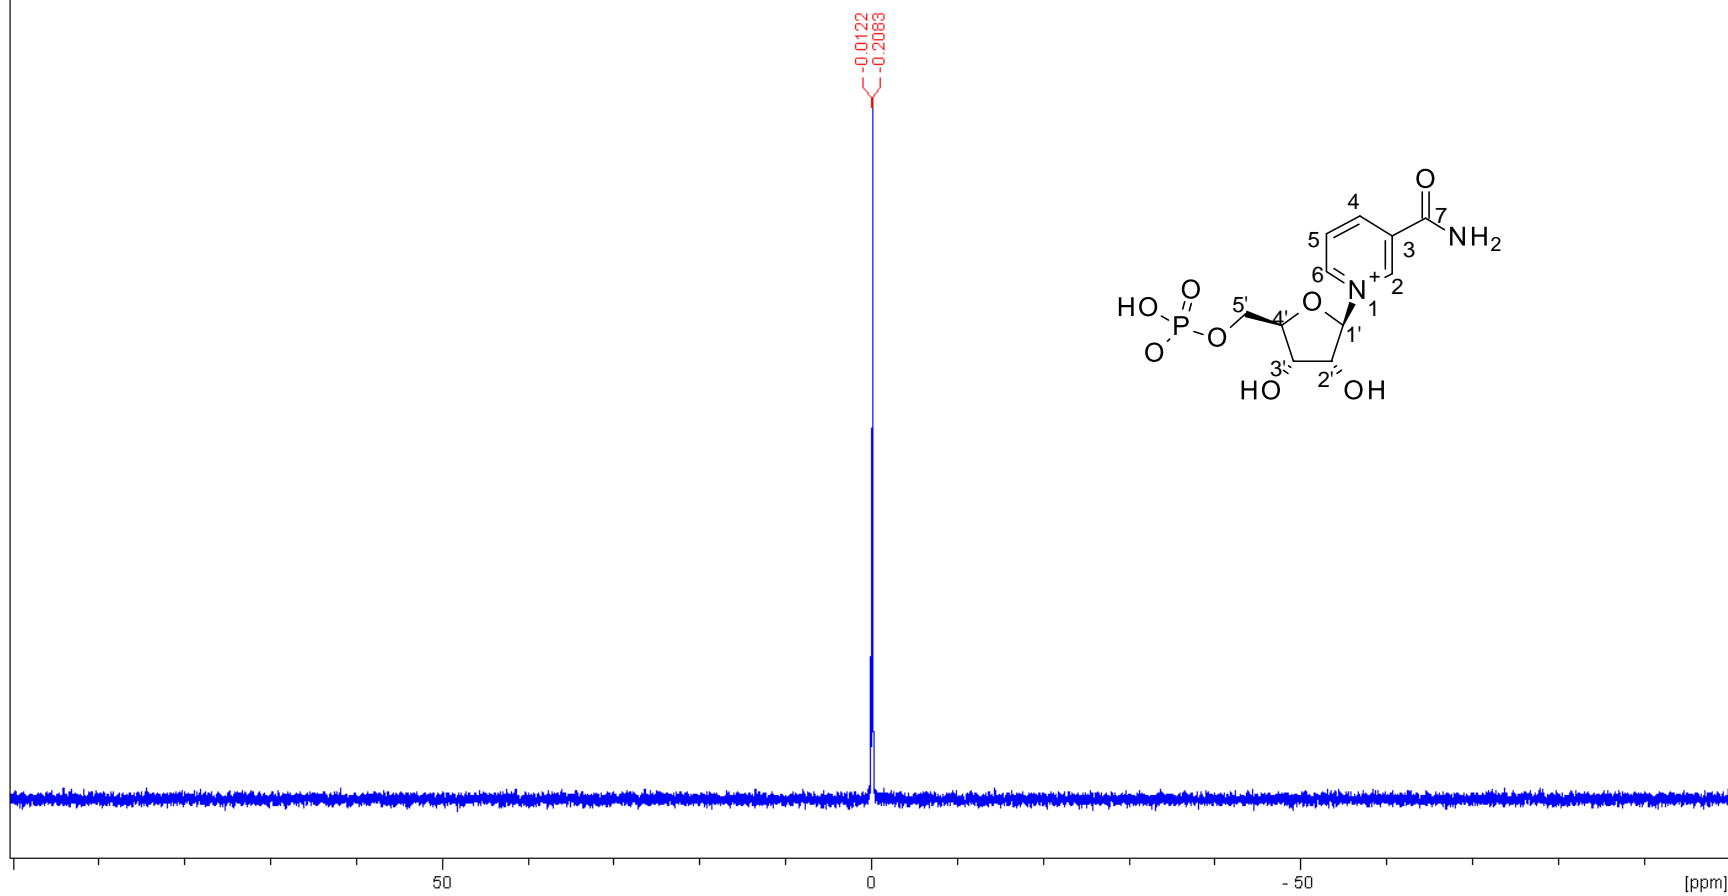

**Compound12.** 162 MHz  $^{31}\text{P}$ NMR spectrum in  $\text{D}_2\text{O}$

C13CPD D2O {C:\Bruker\TopSpin3.5pl6} FH 22

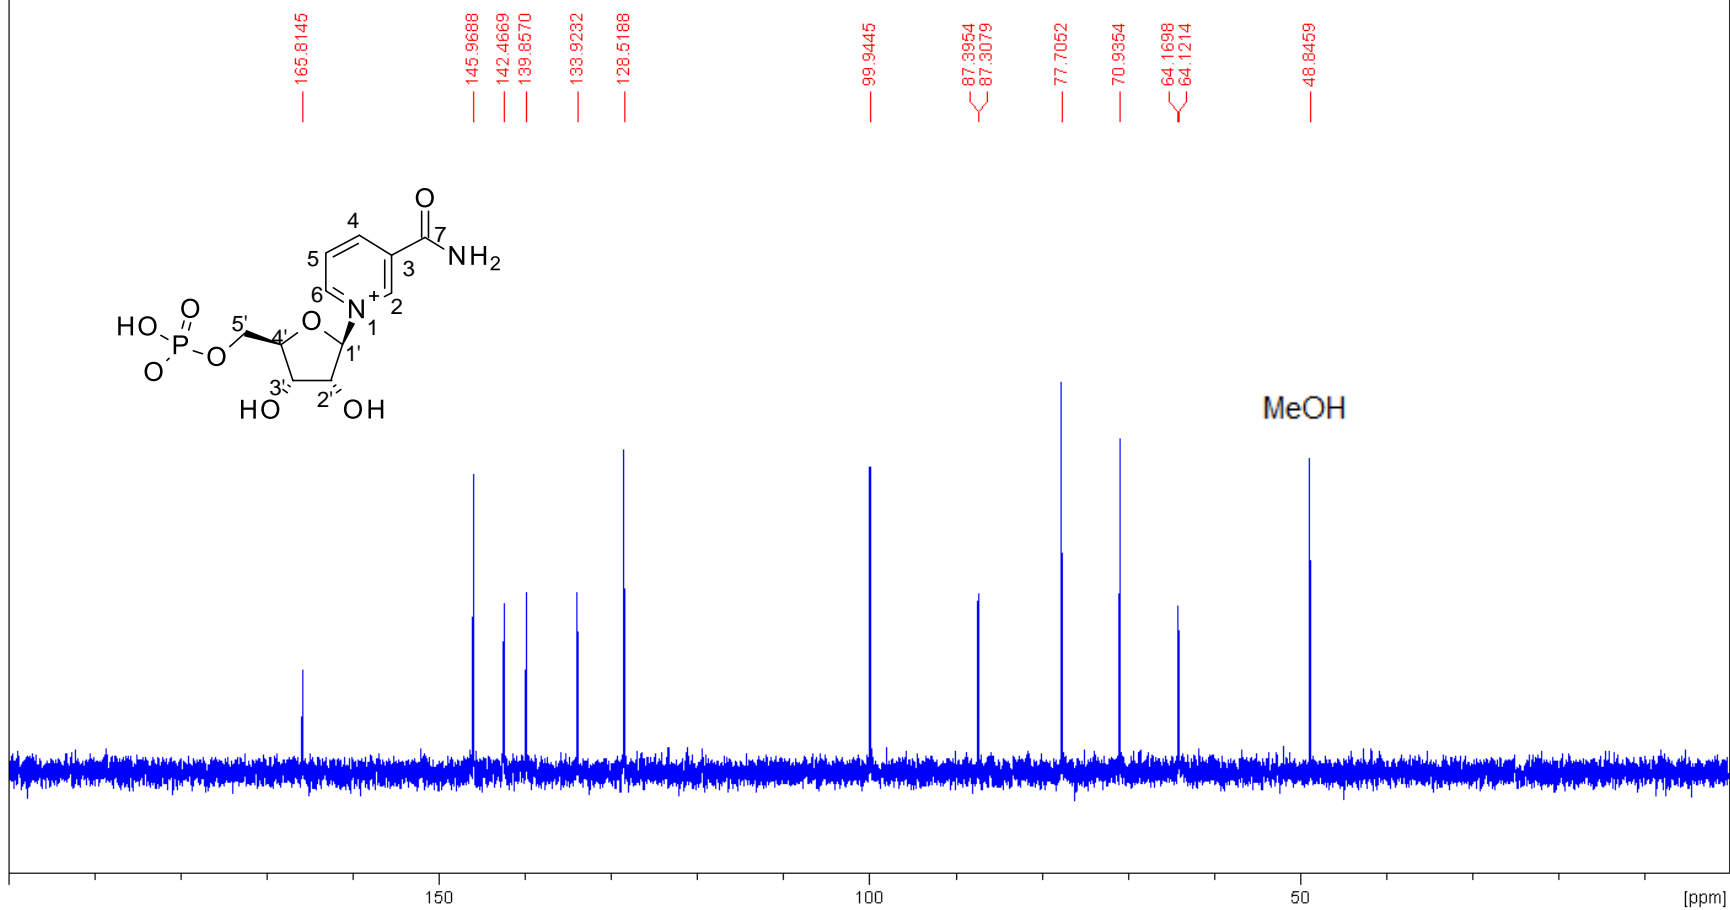

Compound 12. 100 MHz <sup>13</sup>C NMR spectrum in D<sub>2</sub>O

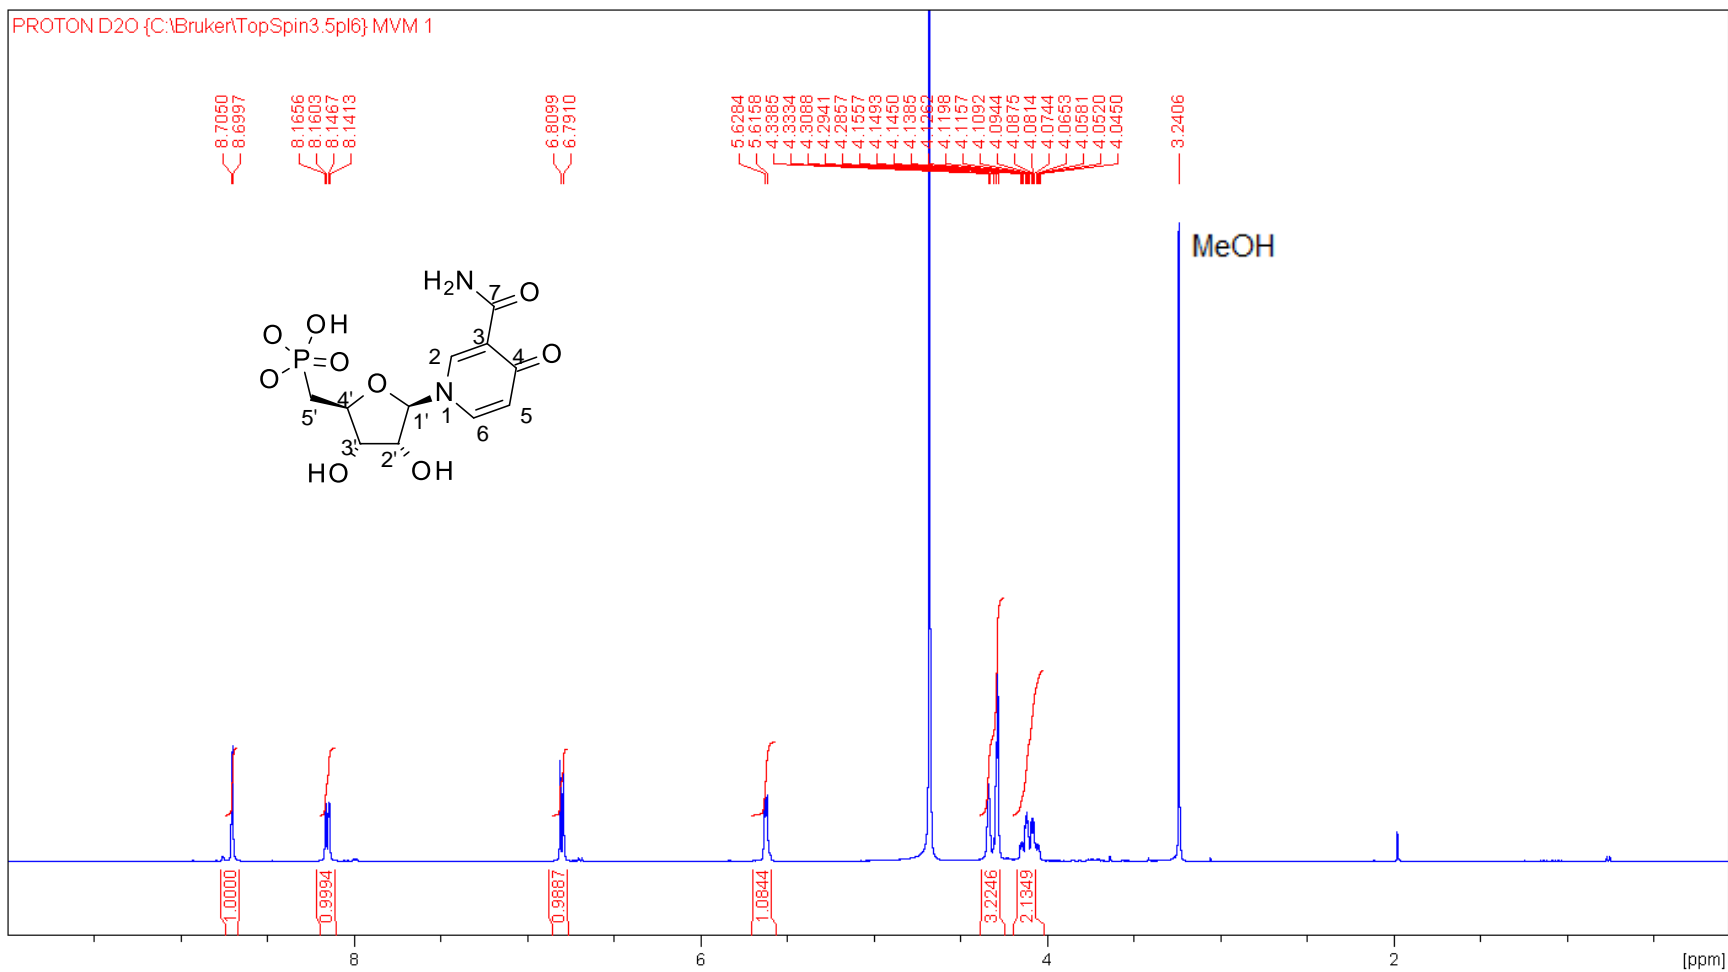

Compound 13. 400 MHz  $^1\text{H}$  NMR spectrum in  $\text{D}_2\text{O}$

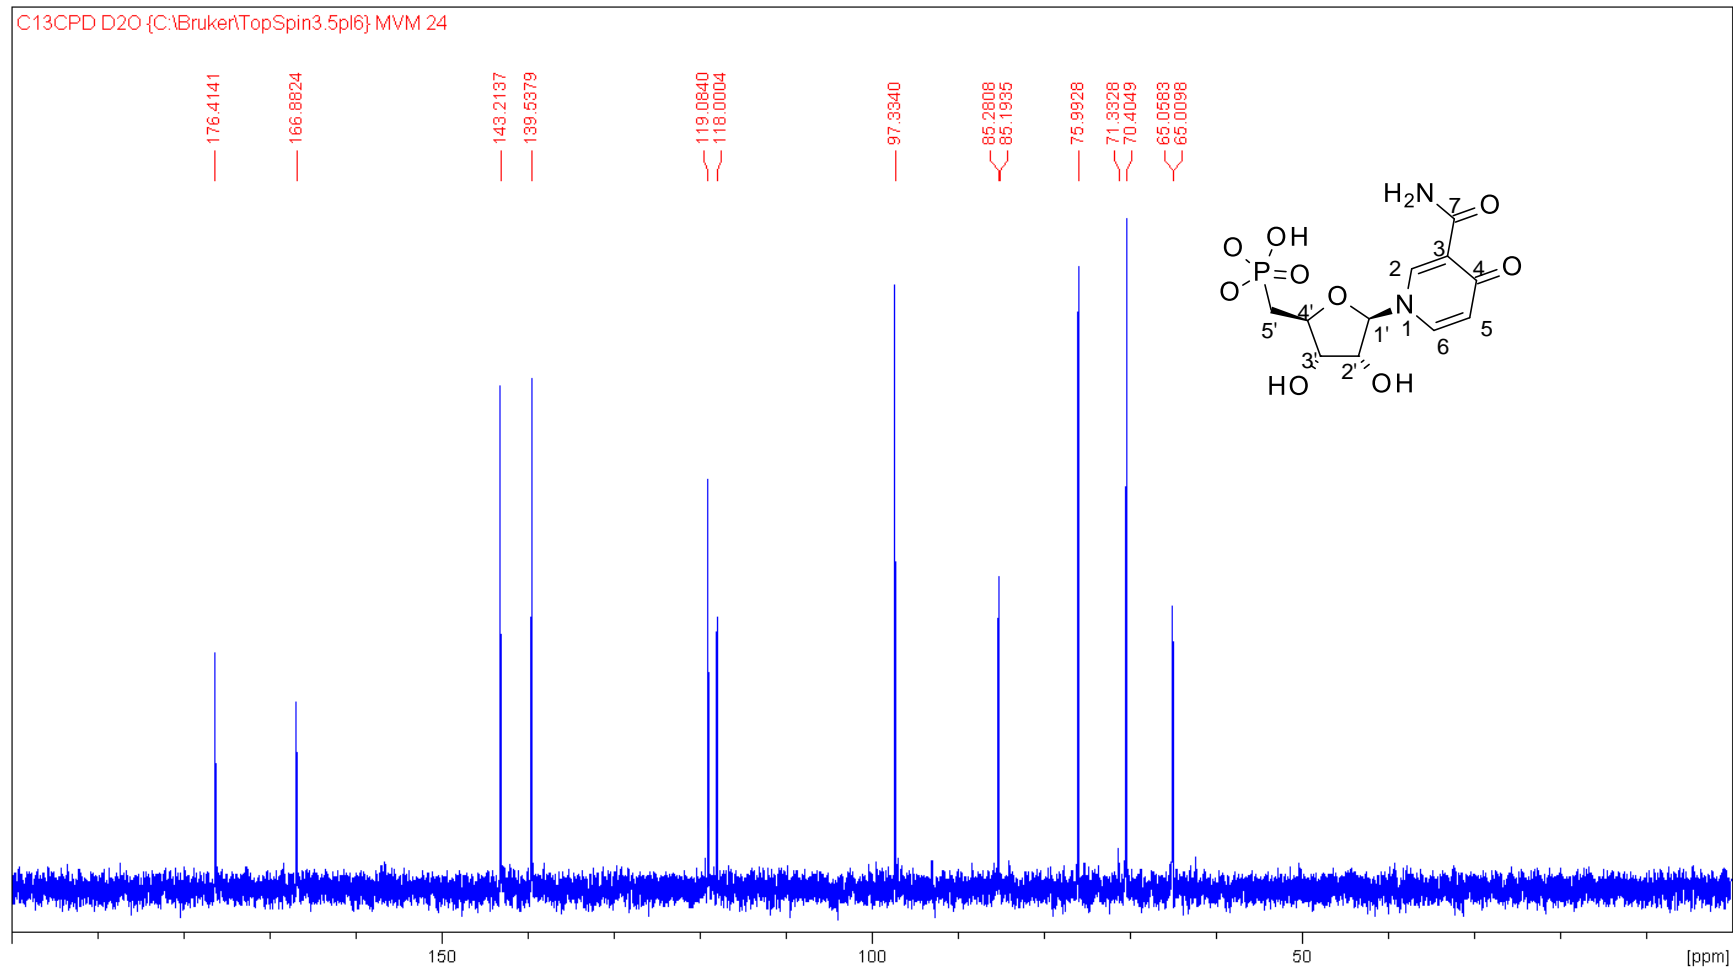

Compound 13. 100 MHz <sup>13</sup>C NMR spectrum in D<sub>2</sub>O

P31CPD D2O {C:\Bruker\TopSpin3.5pl6} MVM 1

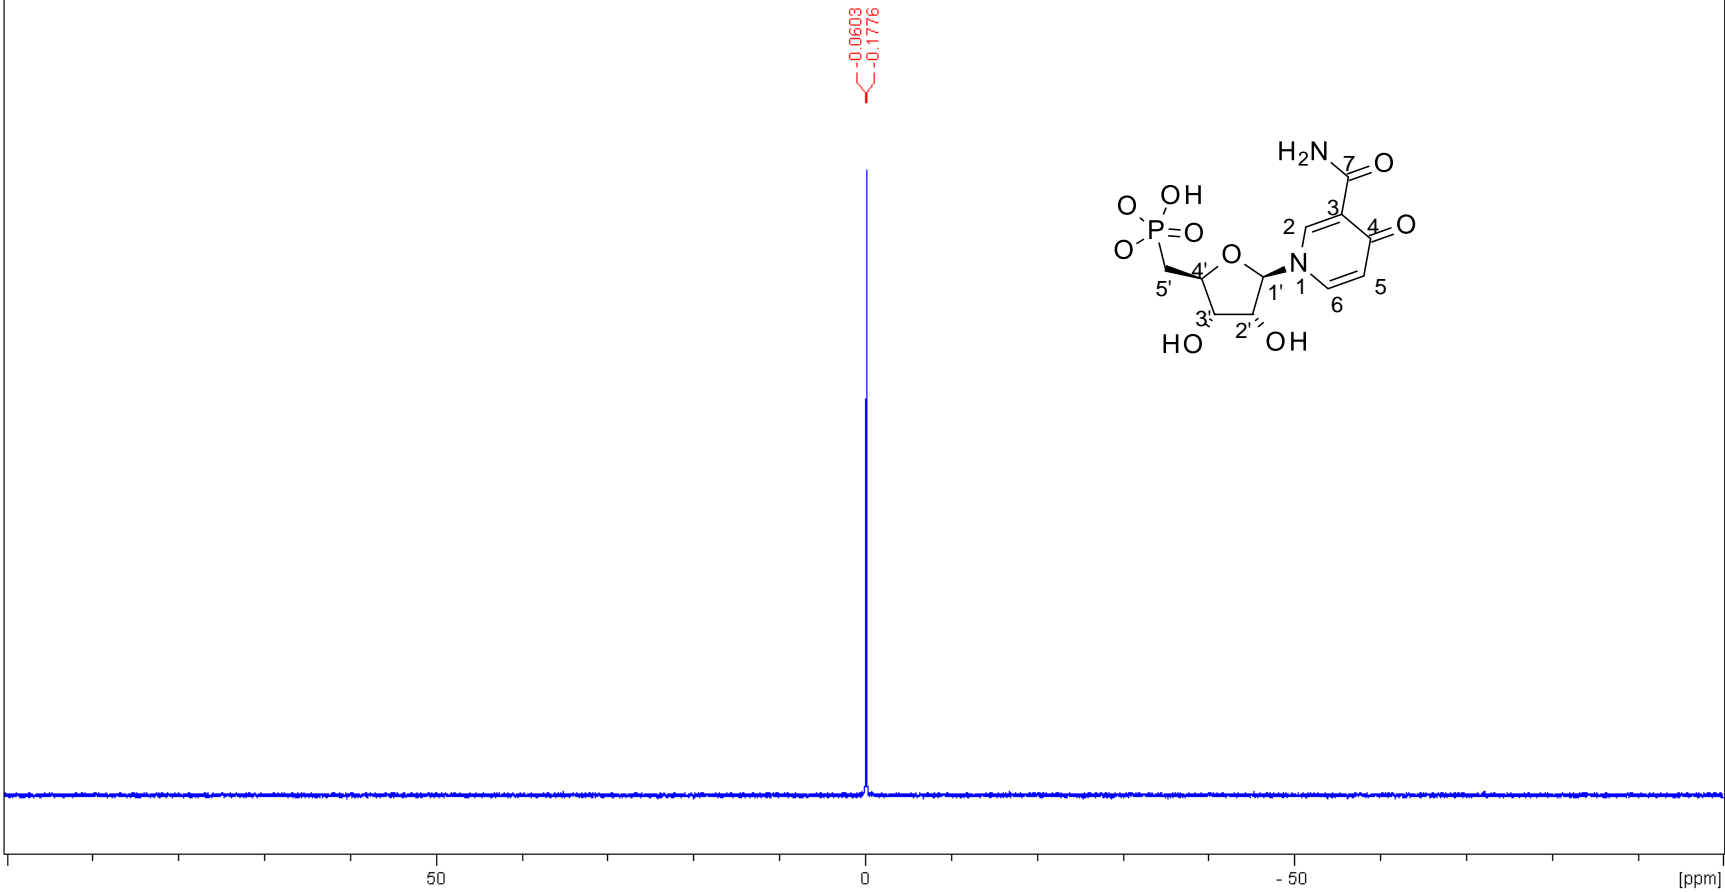

**Compound 13.** 162 MHz  $^{31}\text{P}$  NMR spectrum in  $\text{D}_2\text{O}$

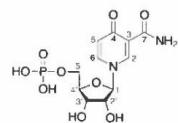

Theoretical  $M/Z =$   
351.059793

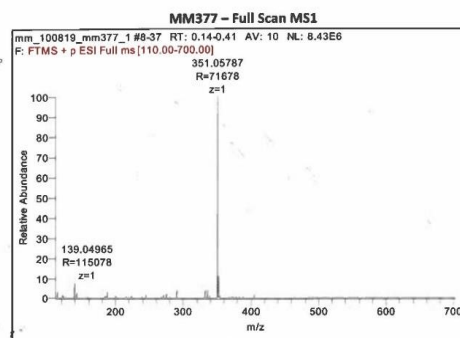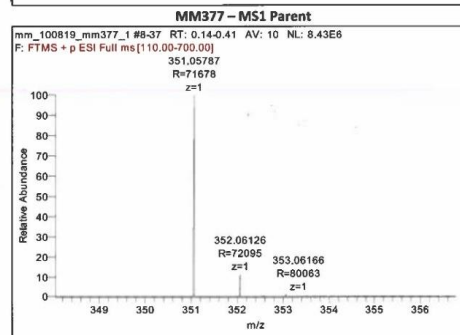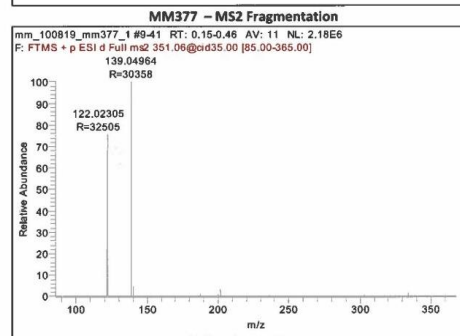

**Compound 13.** HRMS spectra

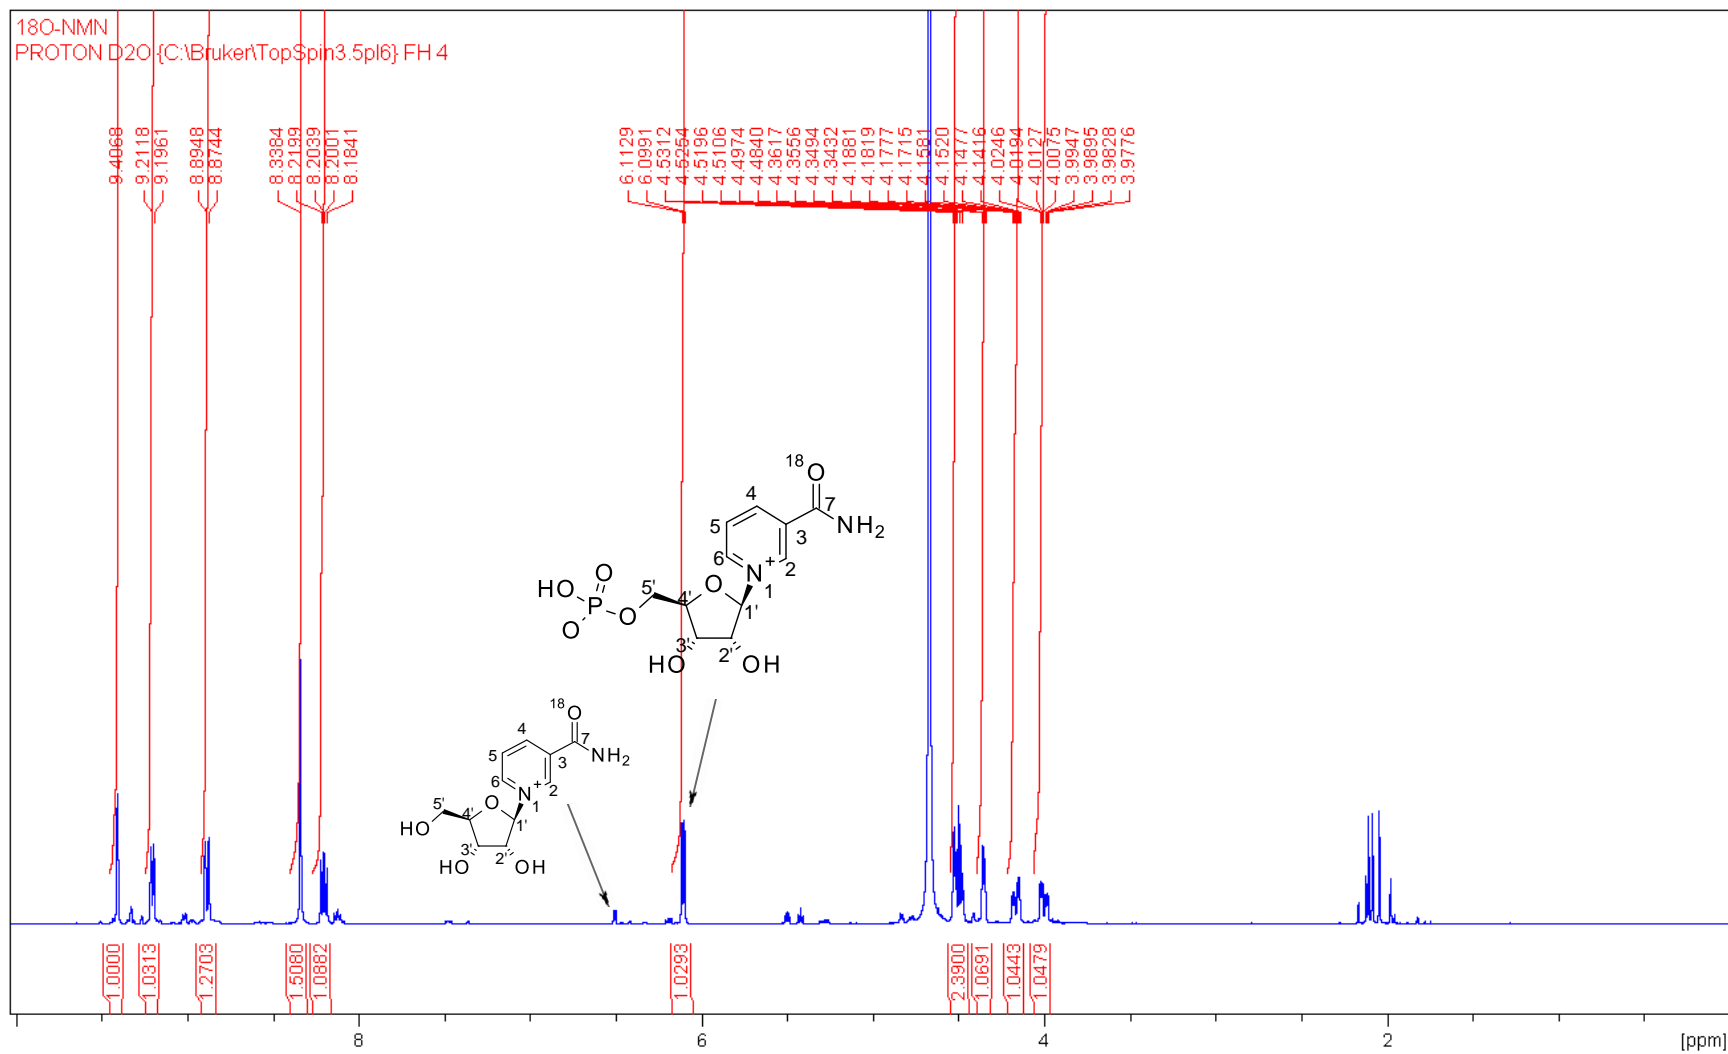

Compound 15. 400 MHz  $^1\text{H}$  NMR spectrum in  $\text{D}_2\text{O}$



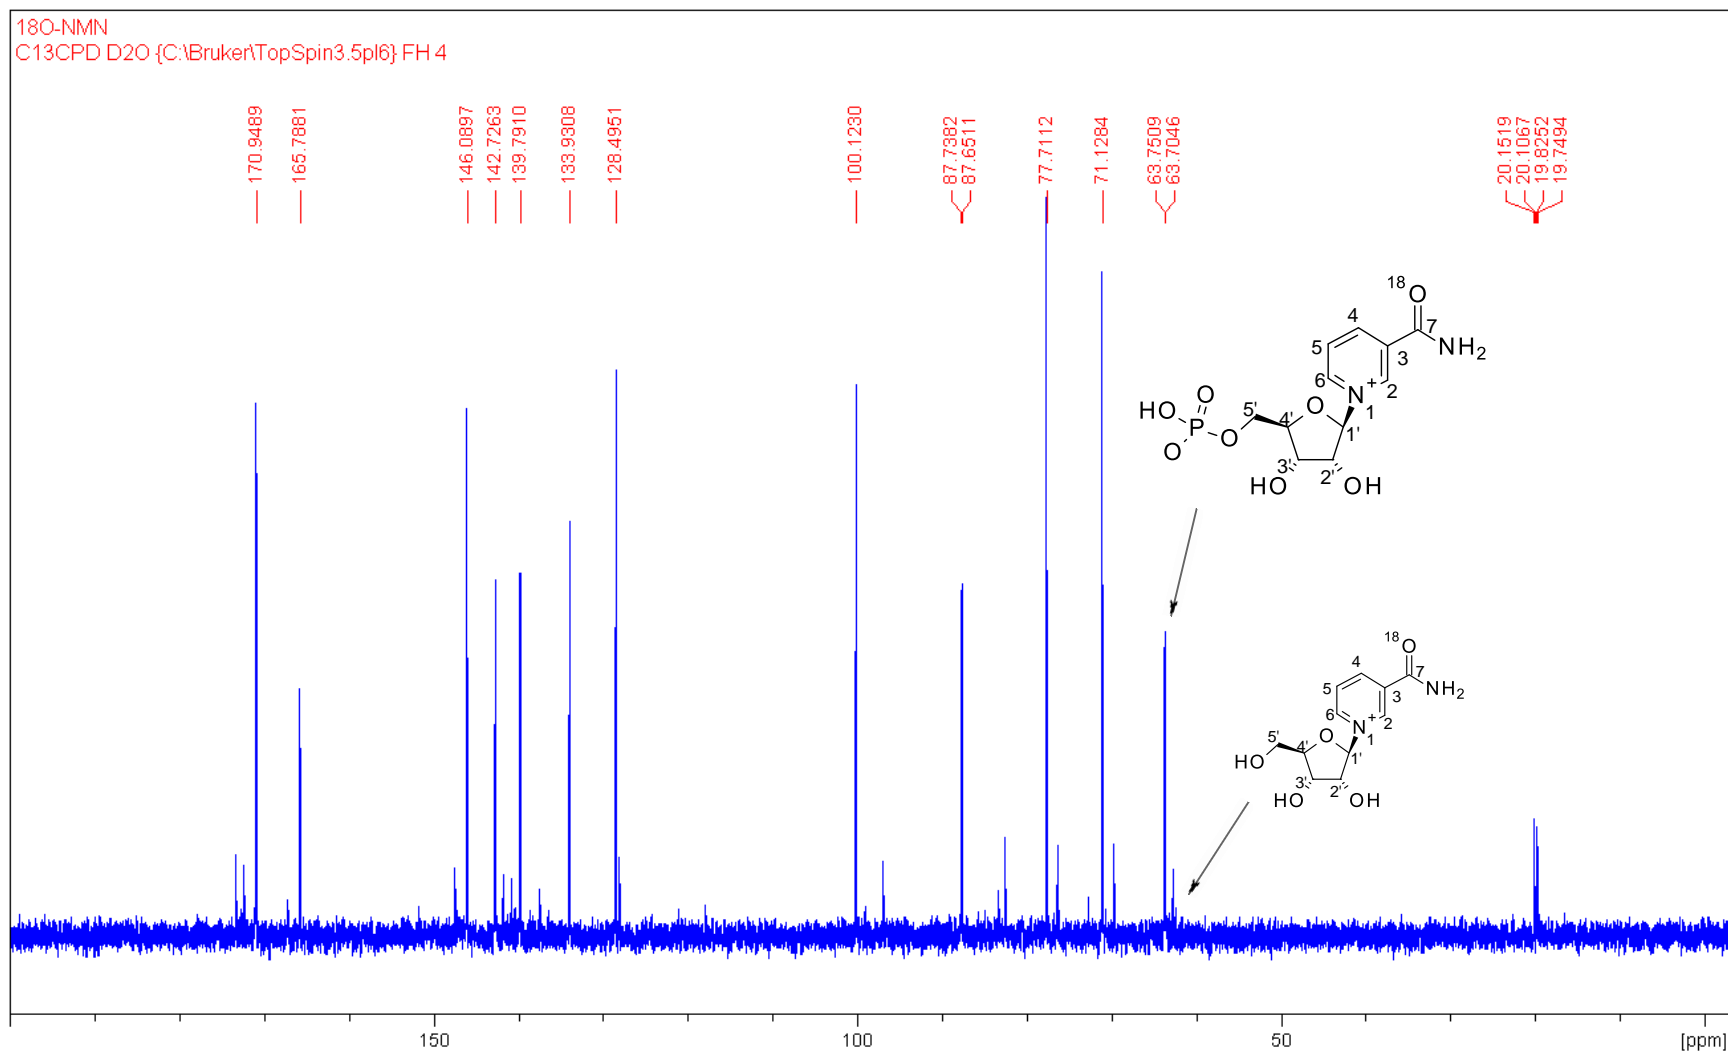

Compound 15. 100 MHz  $^1\text{H}$  NMR spectrum in  $\text{D}_2\text{O}$

18O-NMN  
P31CPD D2O {C:\Bruker\TopSpin3.5pl6} FH 4

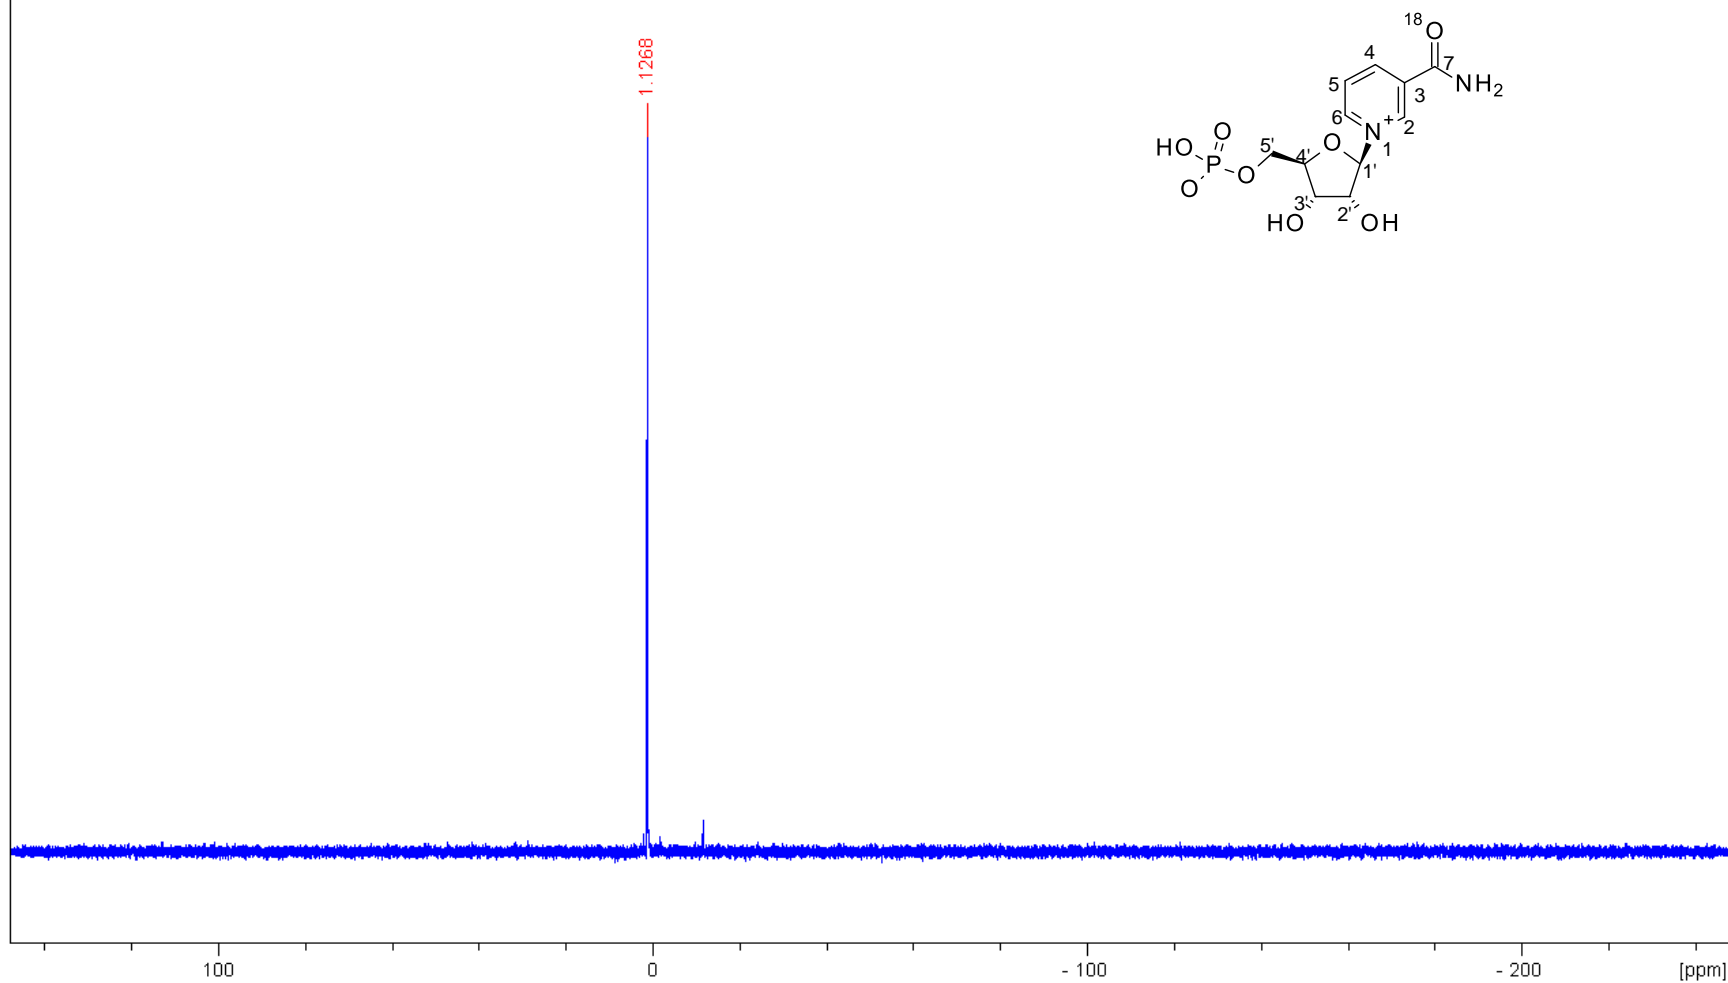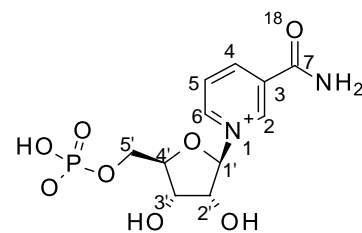

Compound 15. 162 MHz <sup>31</sup>P NMR spectrum in D<sub>2</sub>O

P31CPD D2O {C:\Bruker\TopSpin3.5pl6} FH 4

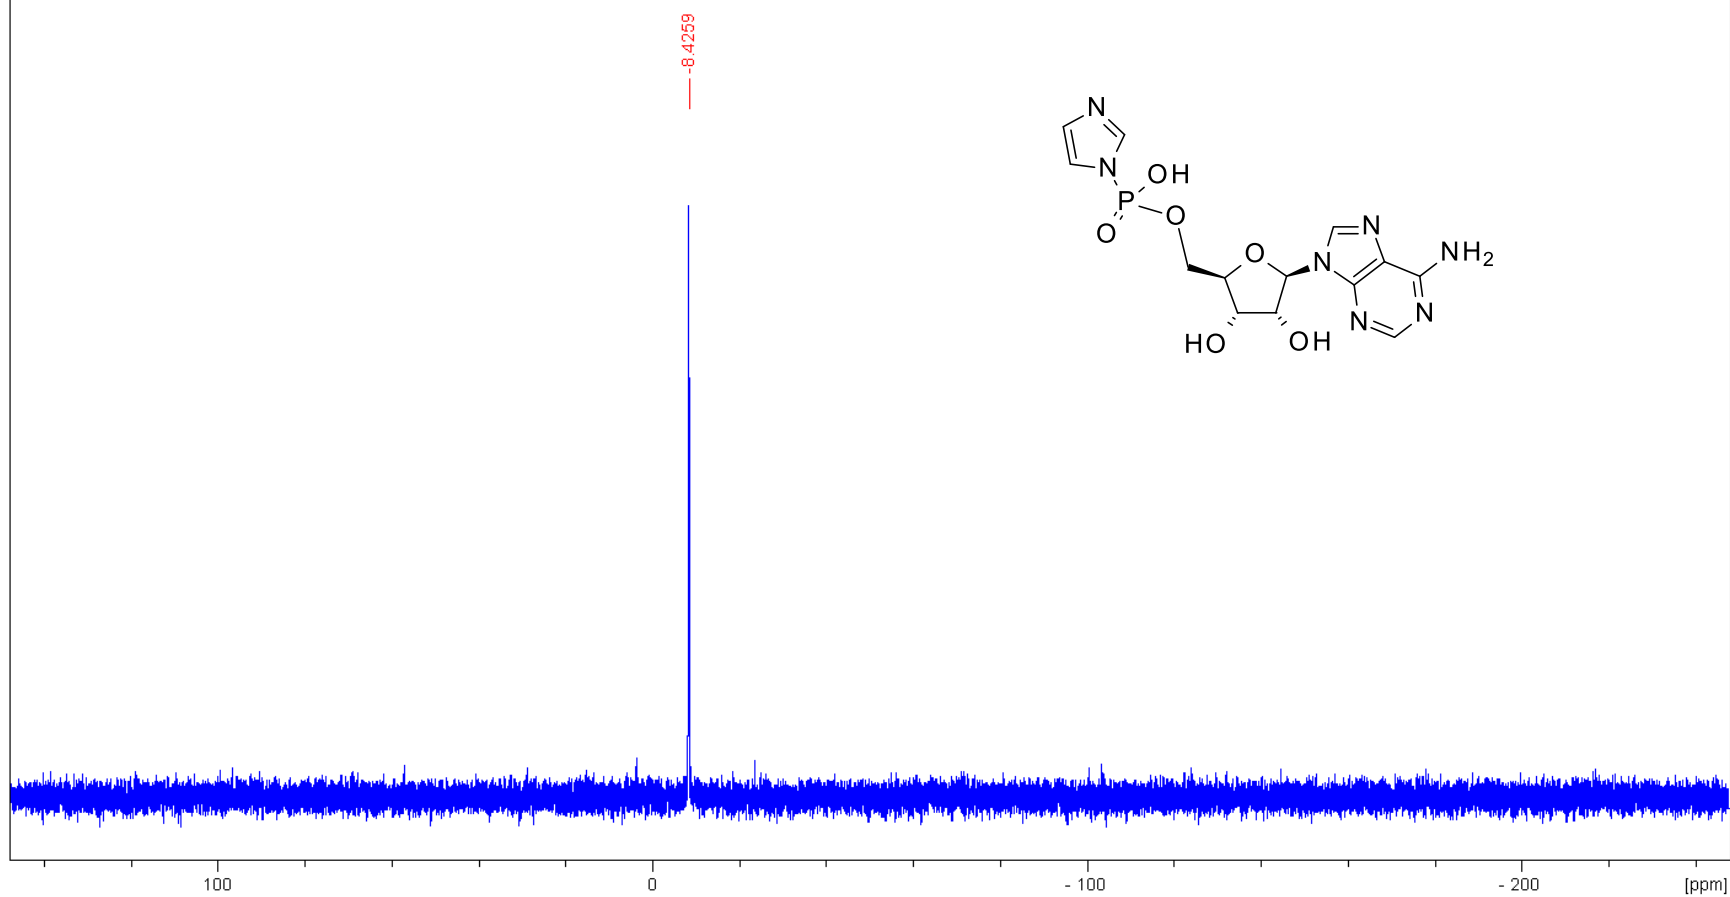

Compound 16. 162 MHz  $^{31}\text{P}$  NMR spectrum in  $\text{D}_2\text{O}$

P31CPD D2O {C:\Bruker\TopSpin3.5pl6} FH 14

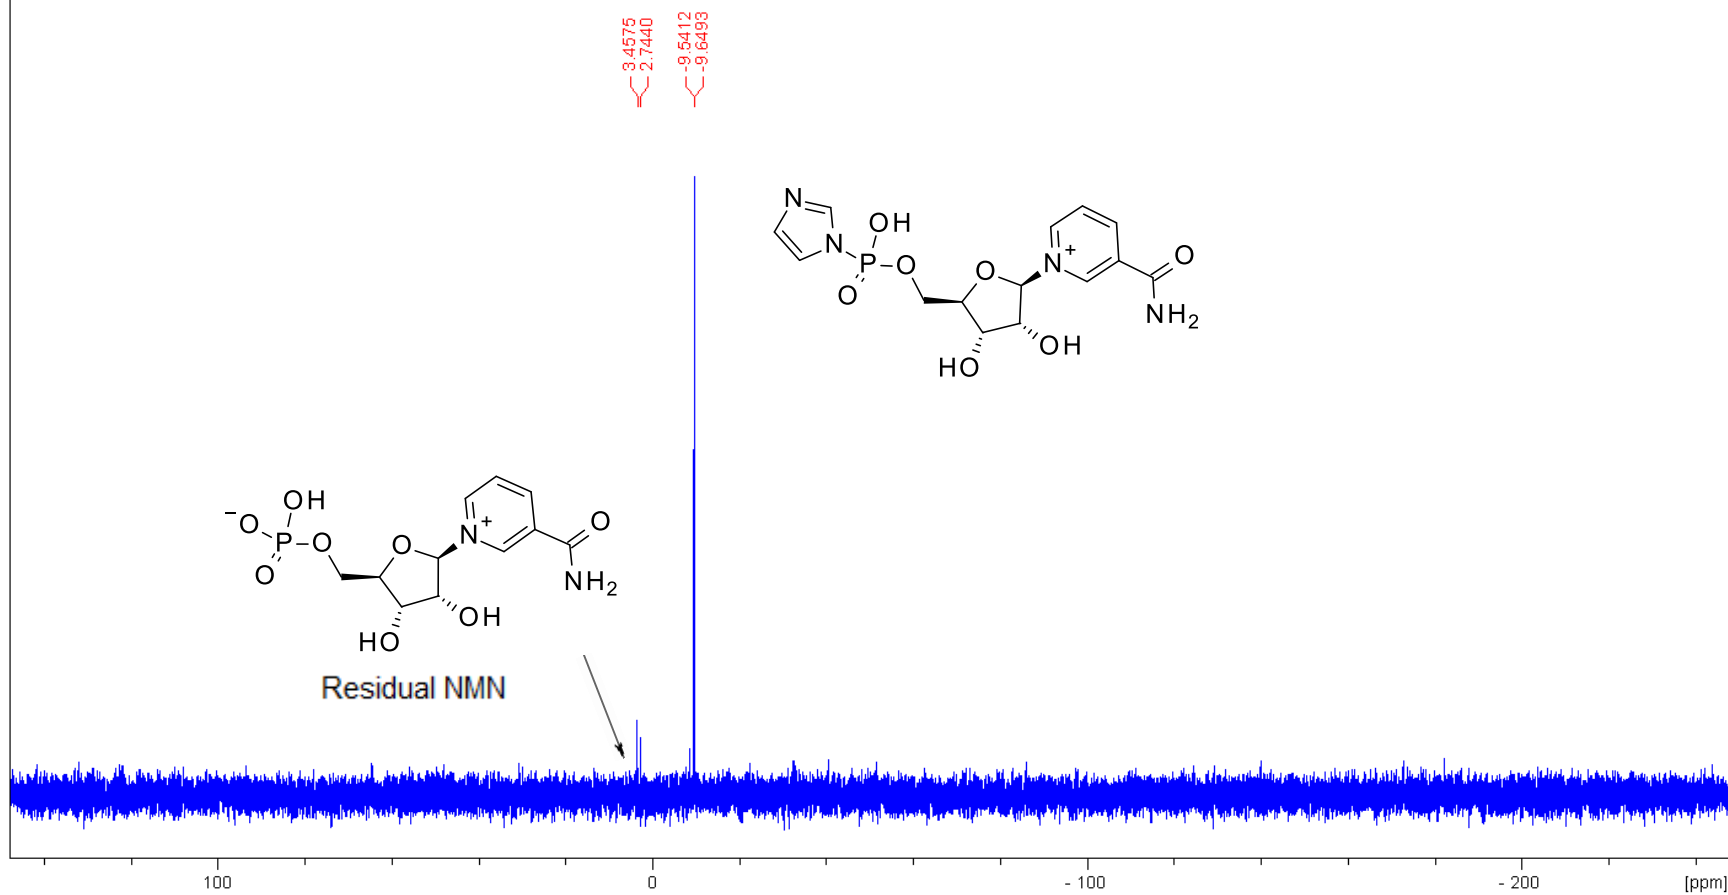

Compound 17. 162 MHz  $^{31}\text{P}$  NMR spectrum in  $\text{D}_2\text{O}$

P31CPD D2O {C:\Bruker\TopSpin3.5pl6} FH 4

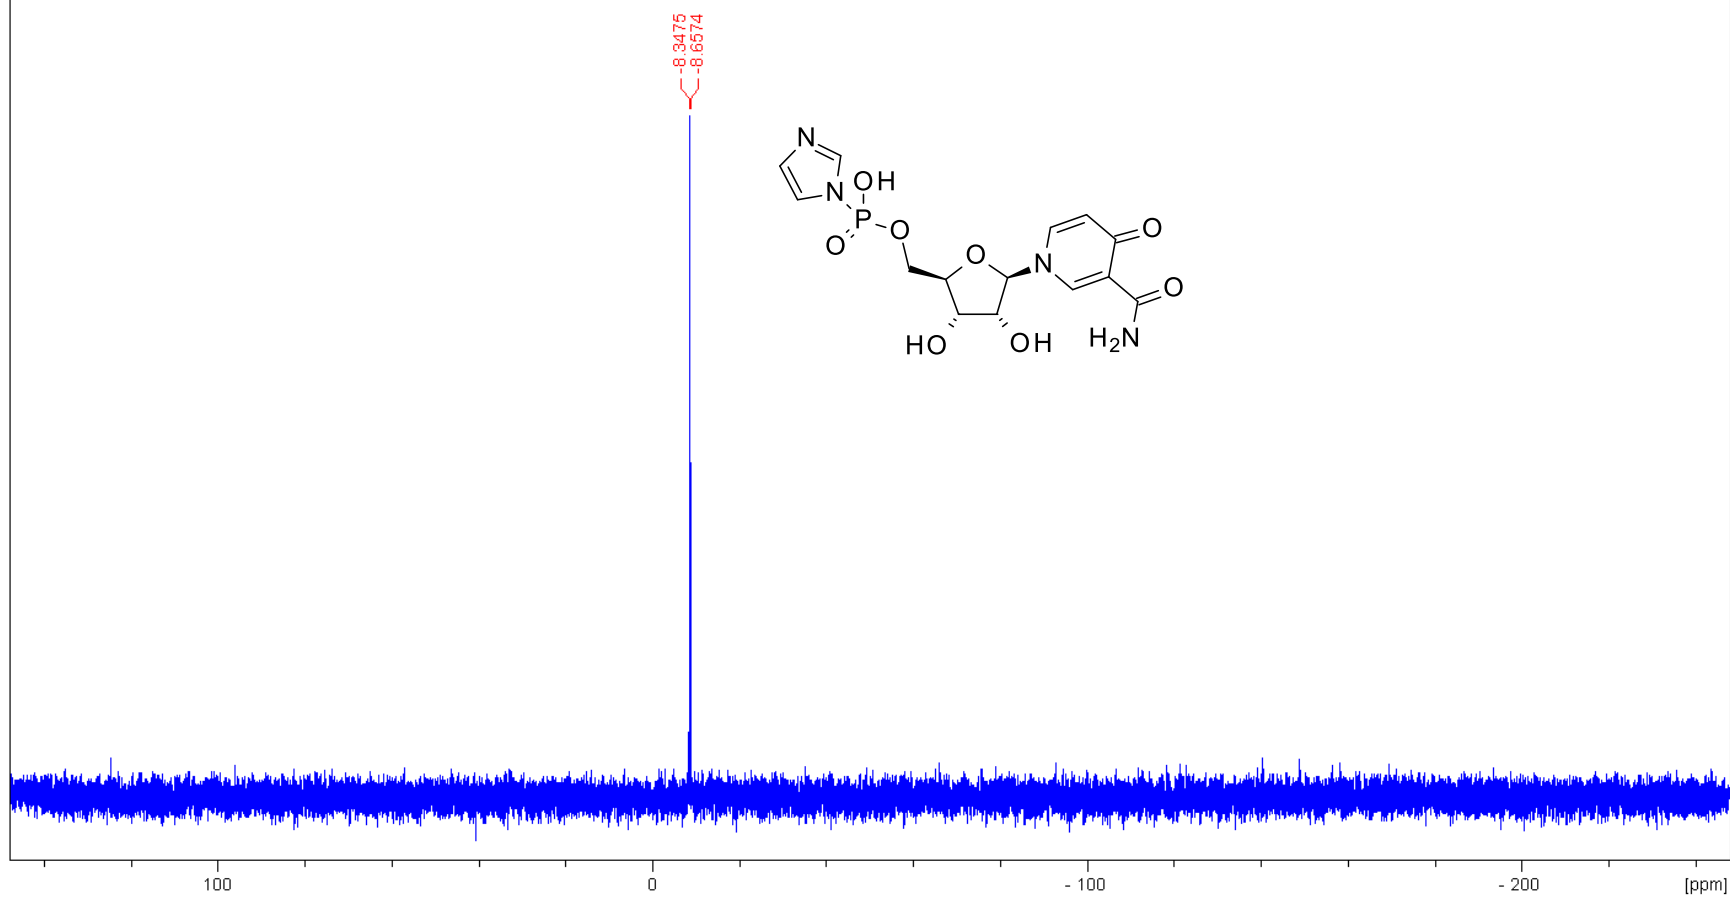

Compound 18. 162 MHz  $^{31}\text{P}$  NMR spectrum in  $\text{D}_2\text{O}$

P31CPD D2O {C:\Bruker\TopSpin3.5pl6} FH 19

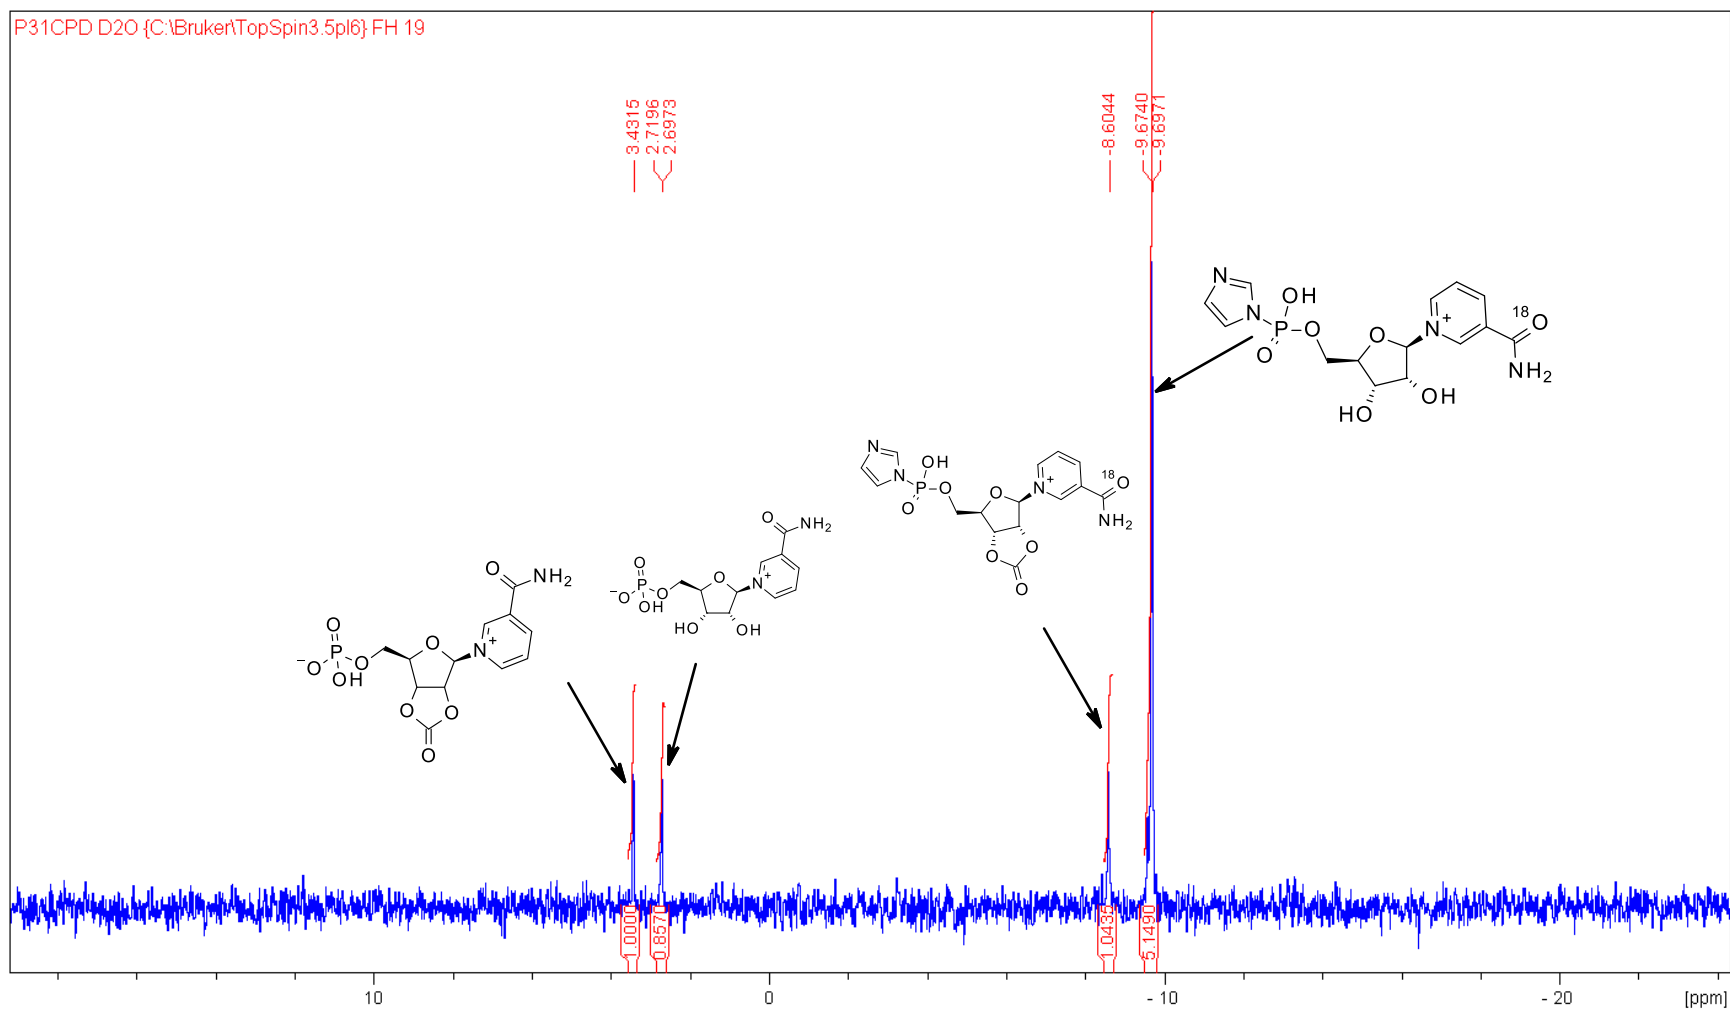

Compound 19. 162 MHz  $^{31}\text{P}$  NMR spectrum in  $\text{D}_2\text{O}$

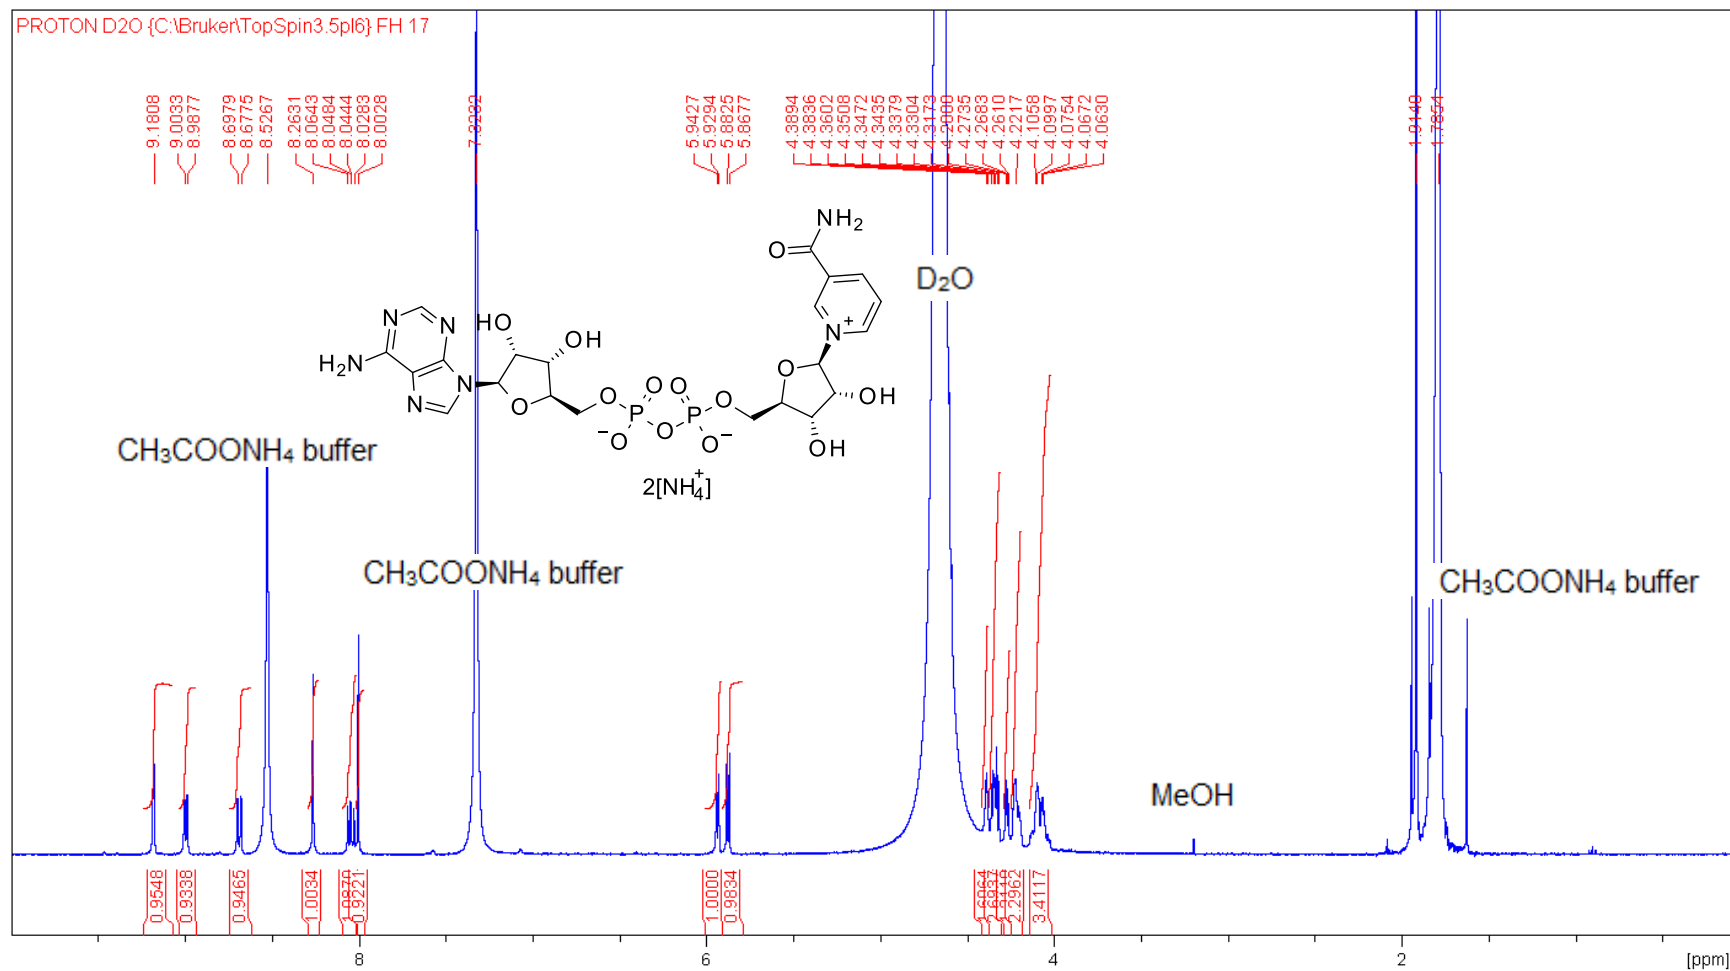

Compound 20. 400 MHz <sup>1</sup>H NMR spectrum in D<sub>2</sub>O

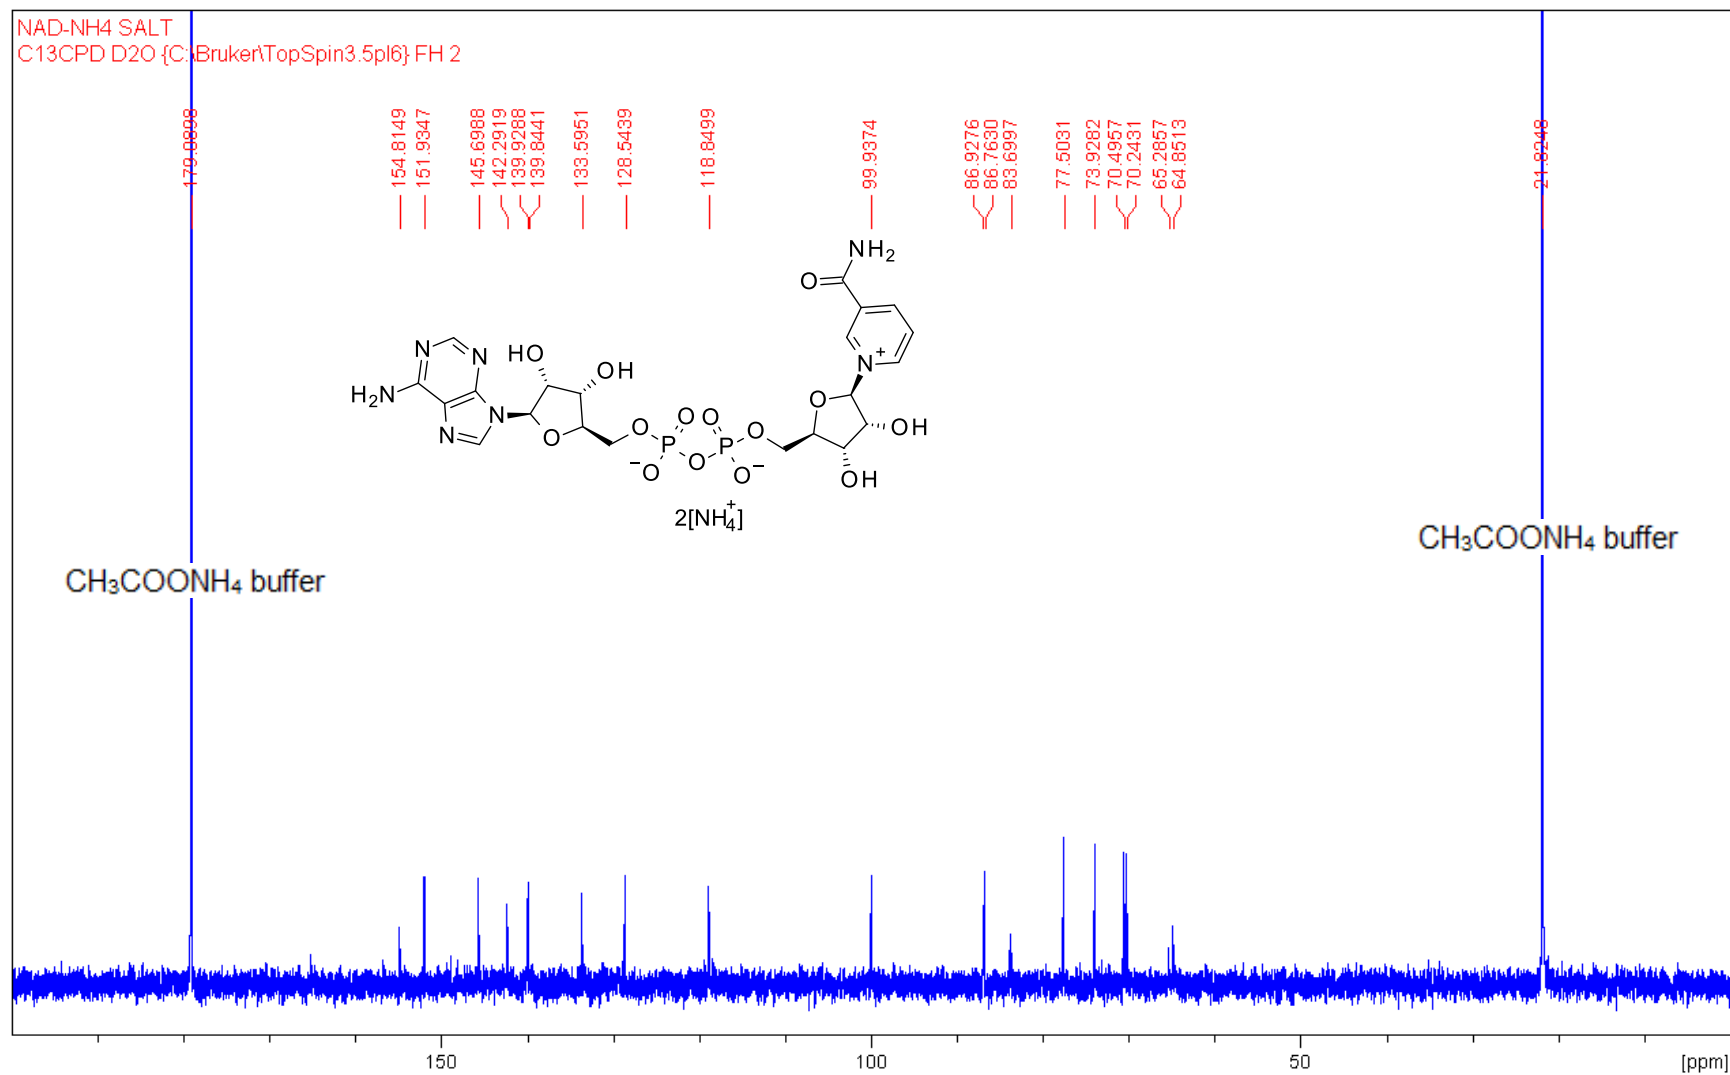

Compound 20. 100 MHz <sup>13</sup>C NMR spectrum in D<sub>2</sub>O



P31CPD D2O {C:\Bruker\TopSpin3.5pl6} FH 17

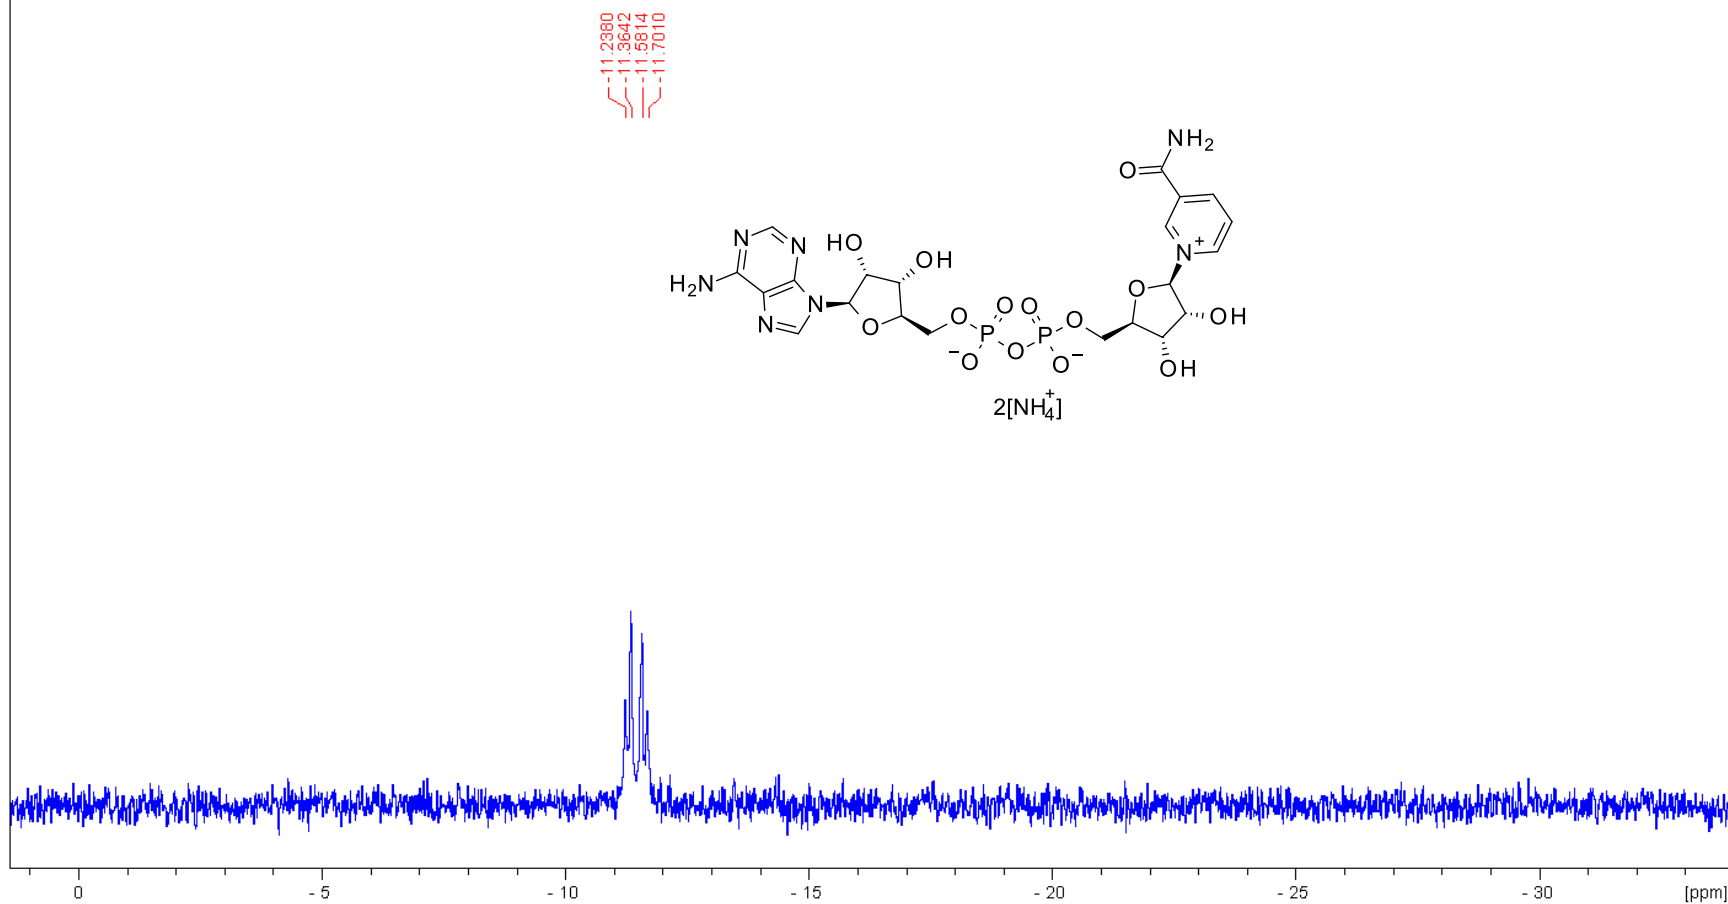

**Compound 20.** 162MHz  $^{31}\text{P}$  NMR spectrum in  $\text{D}_2\text{O}$

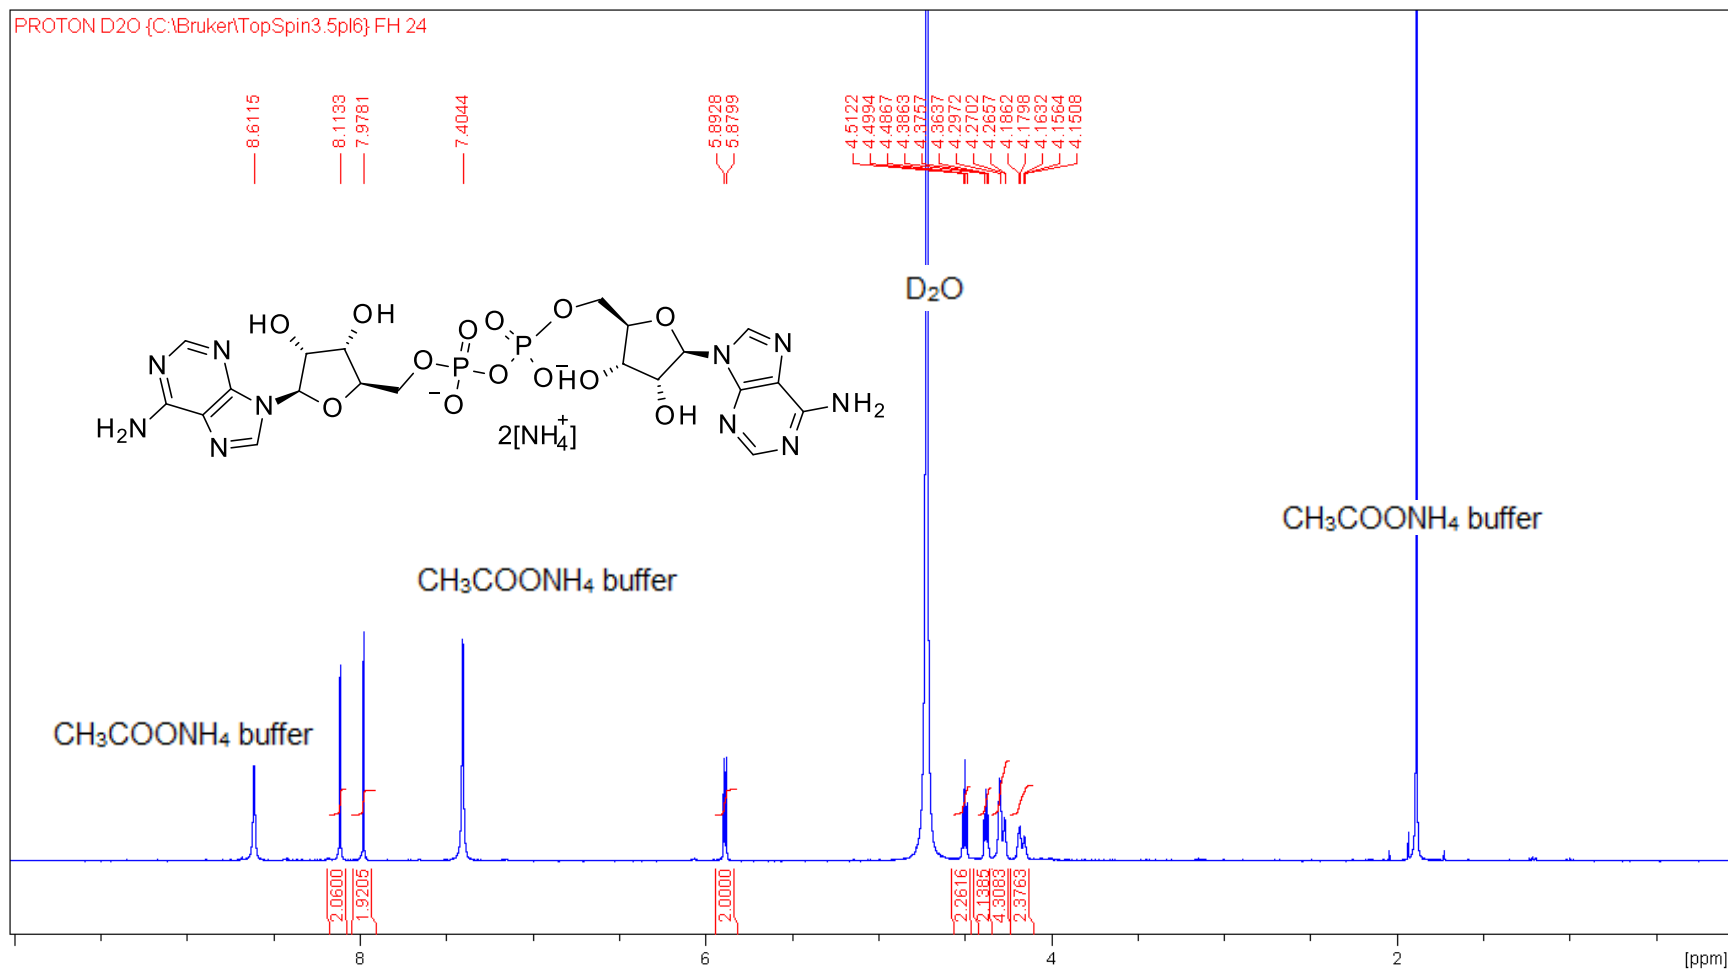

Compound 21. 400 MHz <sup>1</sup>H NMR spectrum in D<sub>2</sub>O

C13CPD D2O {C:\Bruker\TopSpin3.5pl6} FH 24

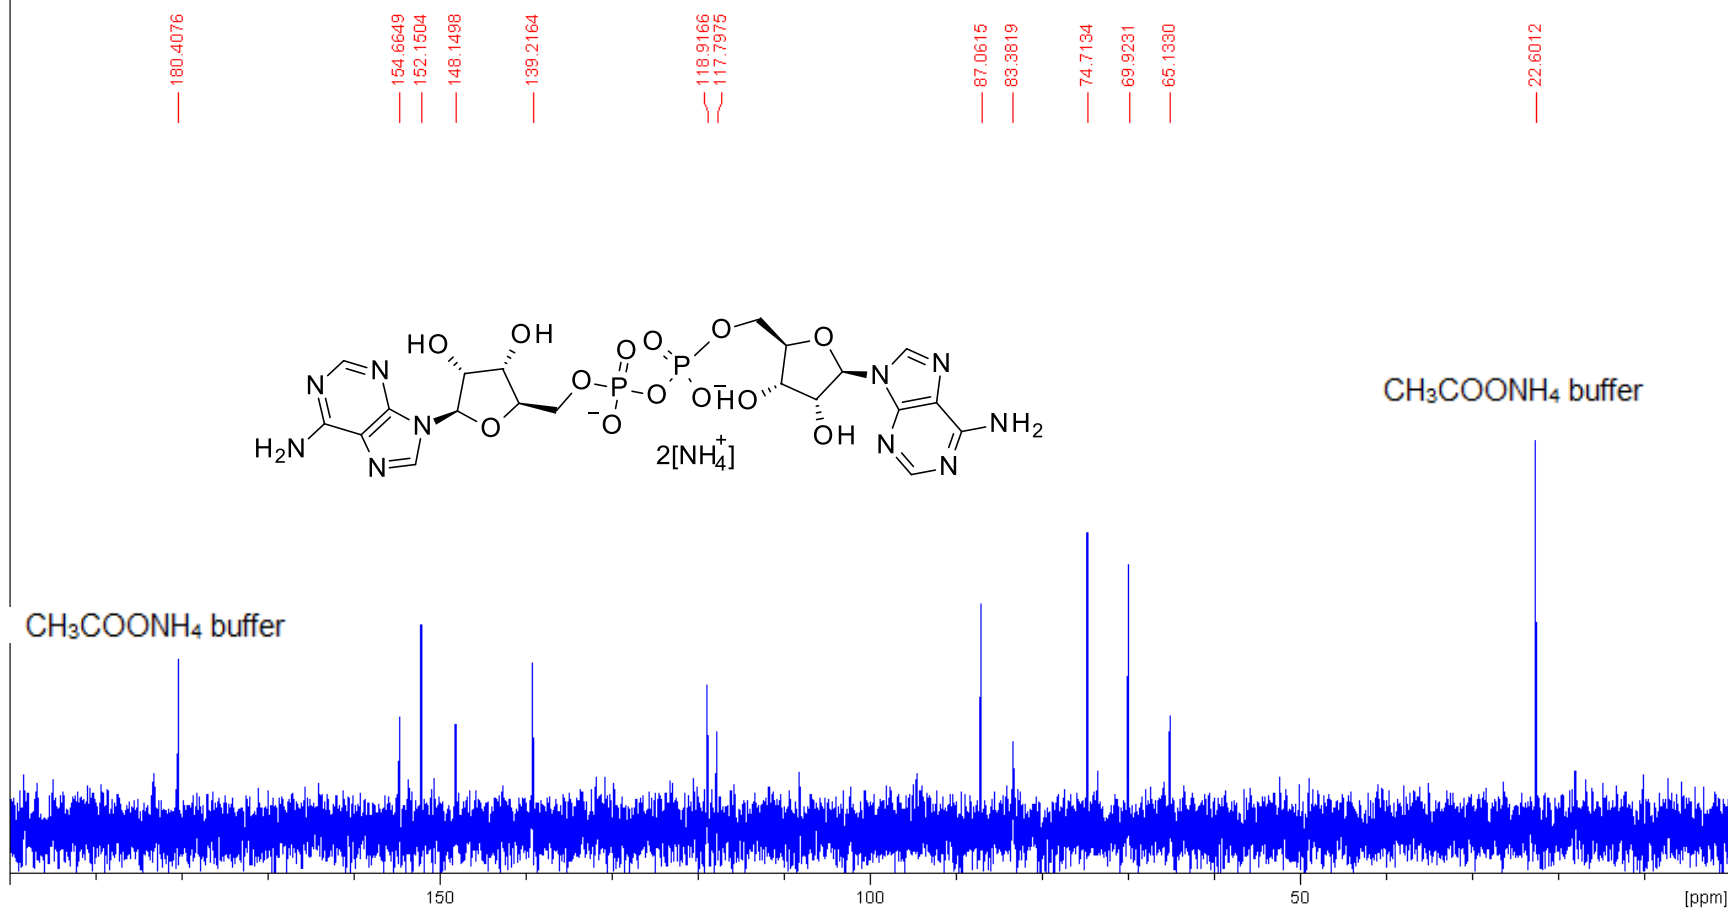

Compound 21. 100 MHz <sup>13</sup>C NMR spectrum in D<sub>2</sub>O

P31CPD D2O {C:\Bruker\TopSpin3.5pl6} FH 24

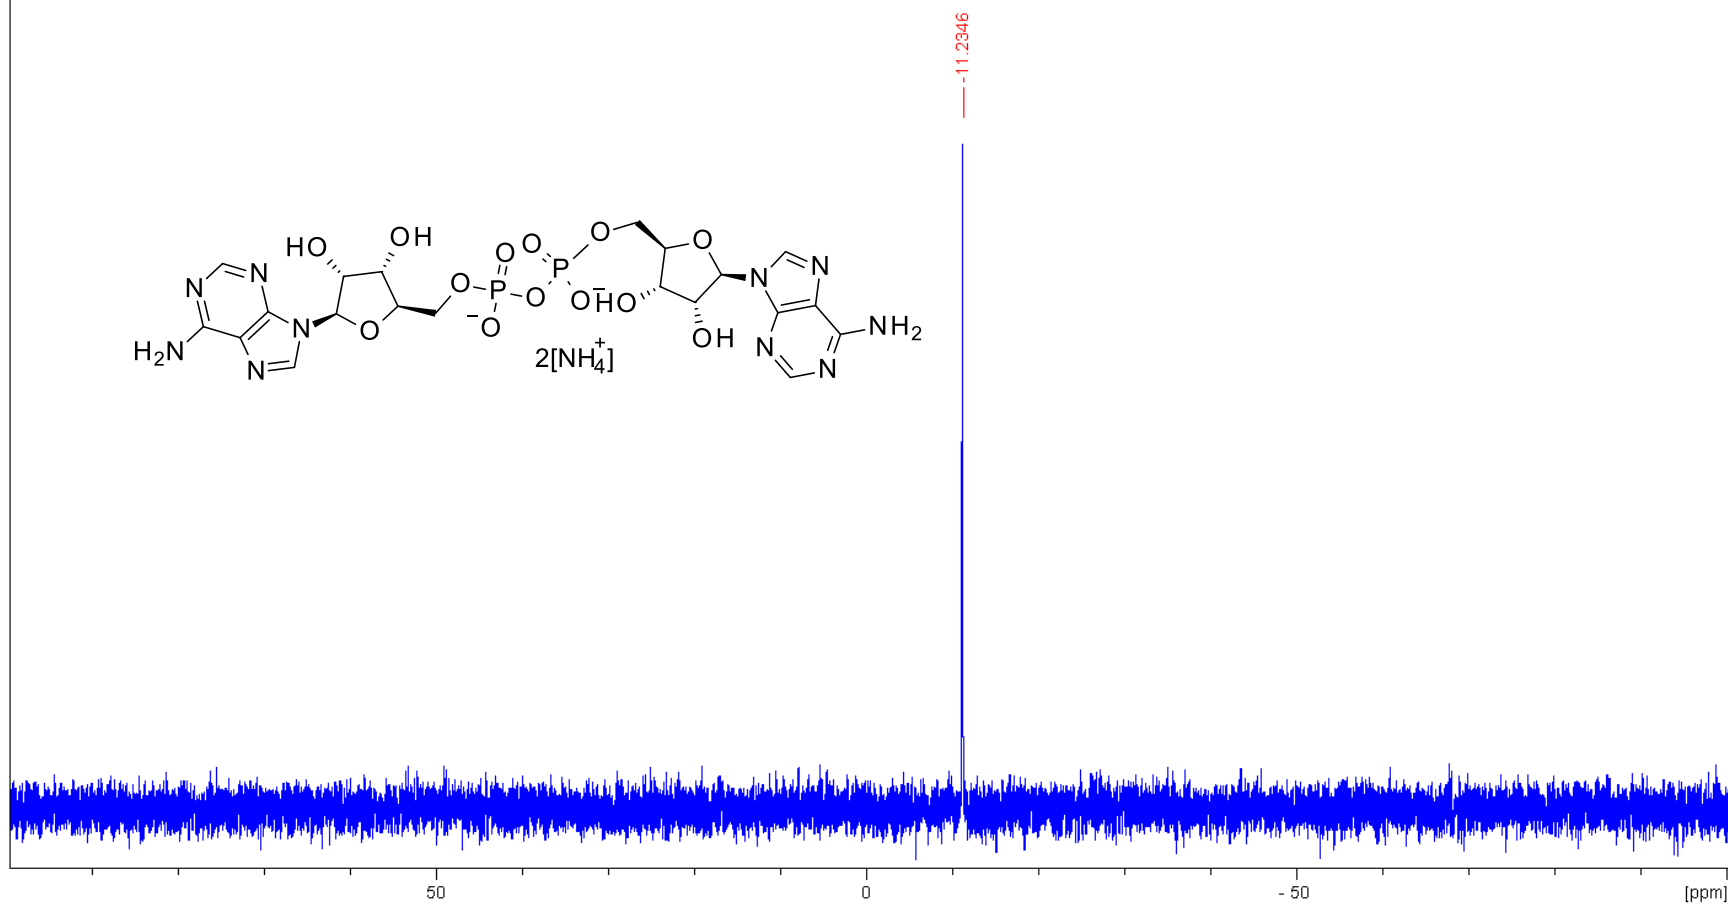

**Compound 21.** 162MHz  $^{31}\text{P}$  NMR spectrum in  $\text{D}_2\text{O}$

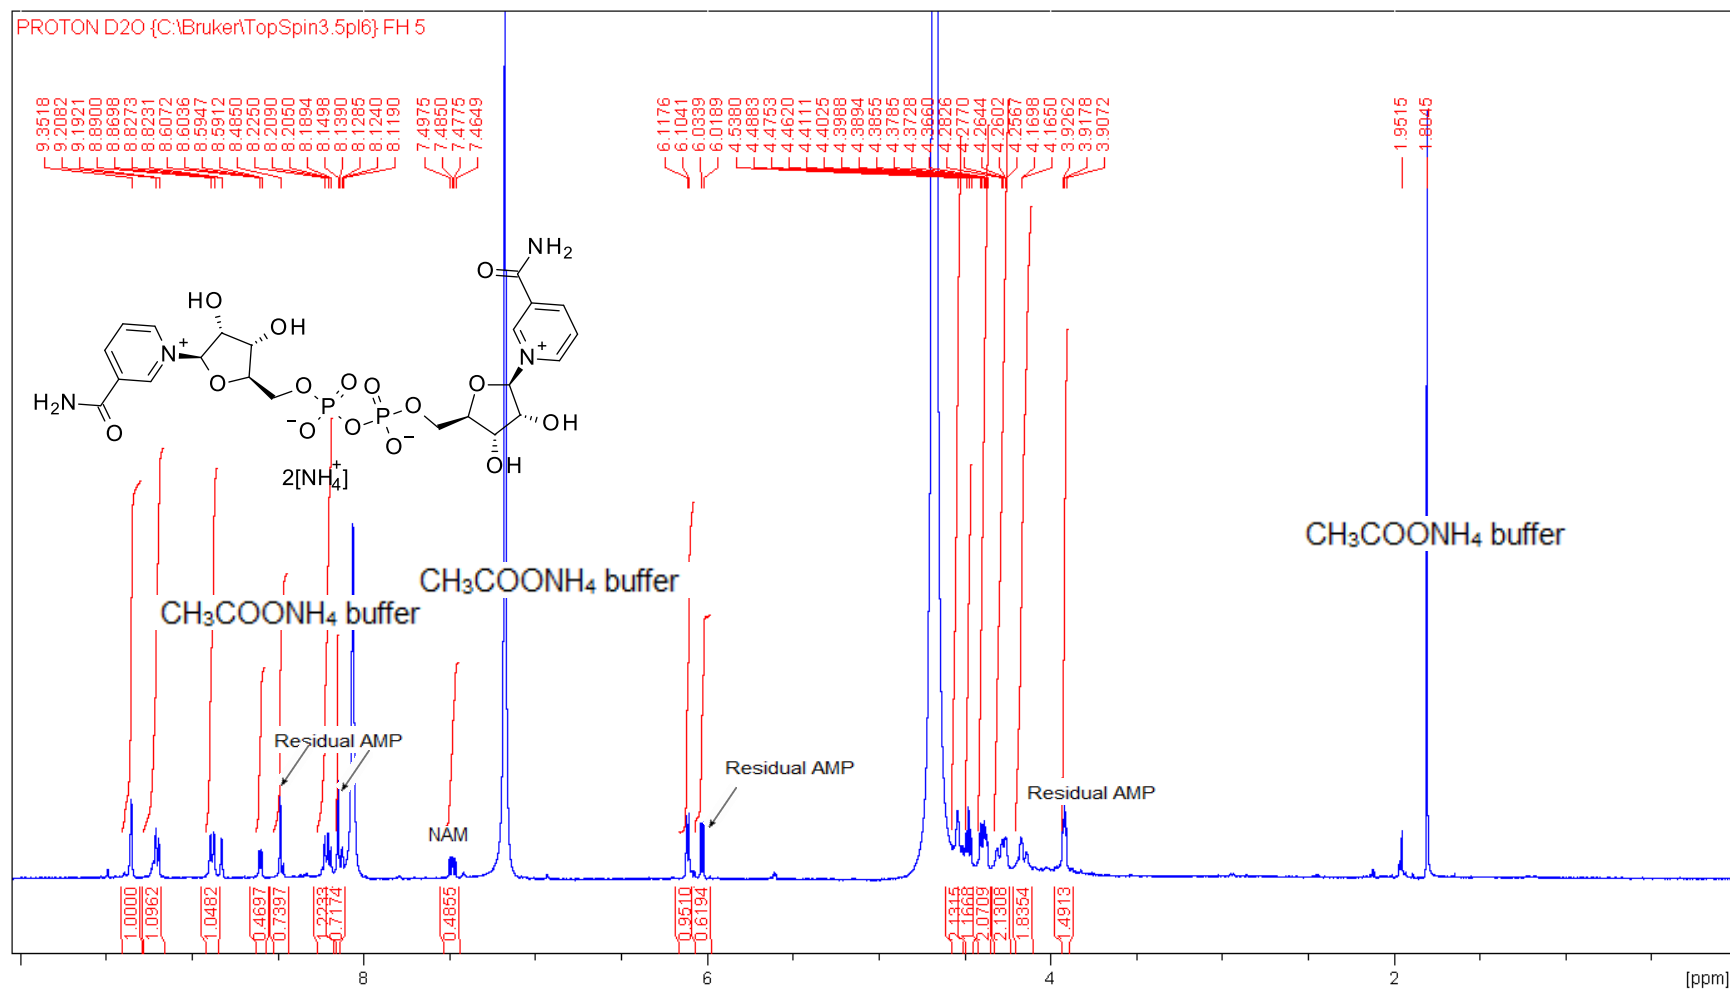

Compound 22. 400 MHz <sup>1</sup>H NMR spectrum in D<sub>2</sub>O

P31CPD D2O {C:\Bruker\TopSpin3.5pl6} FH 24

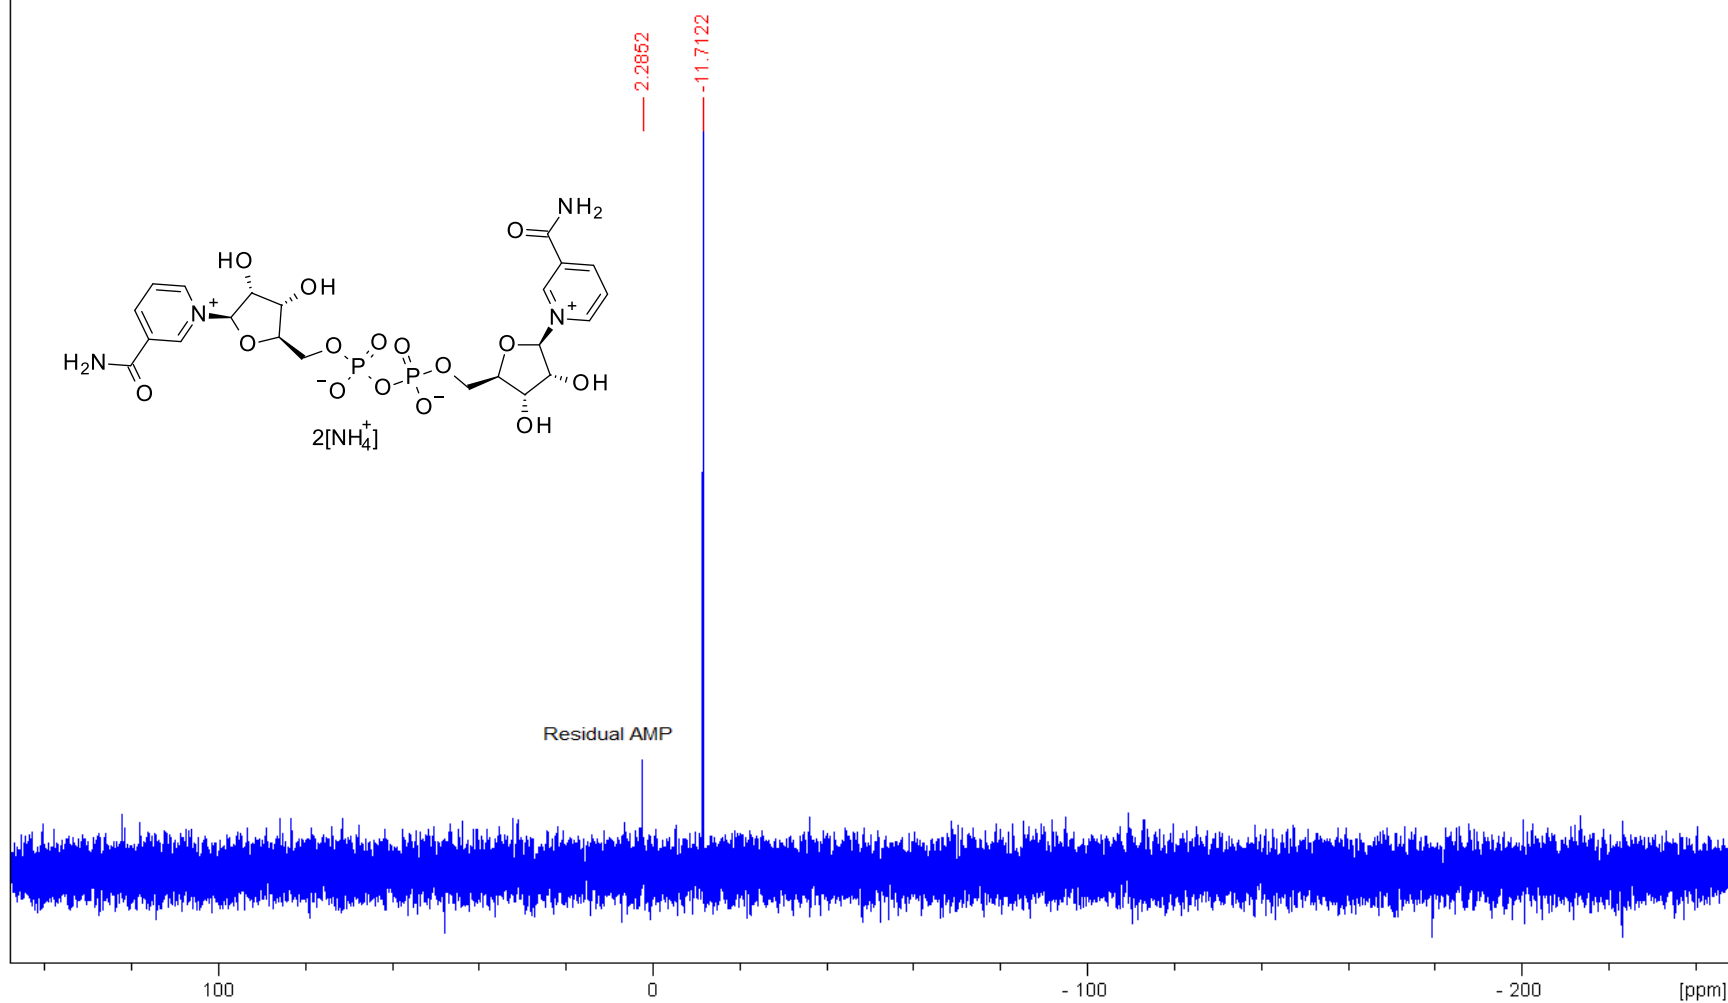

Compound 22. 162 MHz  $^{31}\text{P}$  NMR spectrum in  $\text{D}_2\text{O}$

mm\_1119121\_2\_double\_nmn\_02 #21 15 RT: 0.200.60 AU: 3 NL: 4.12E5

F: FTMS + p ESI Full ms[50.00-900.0]

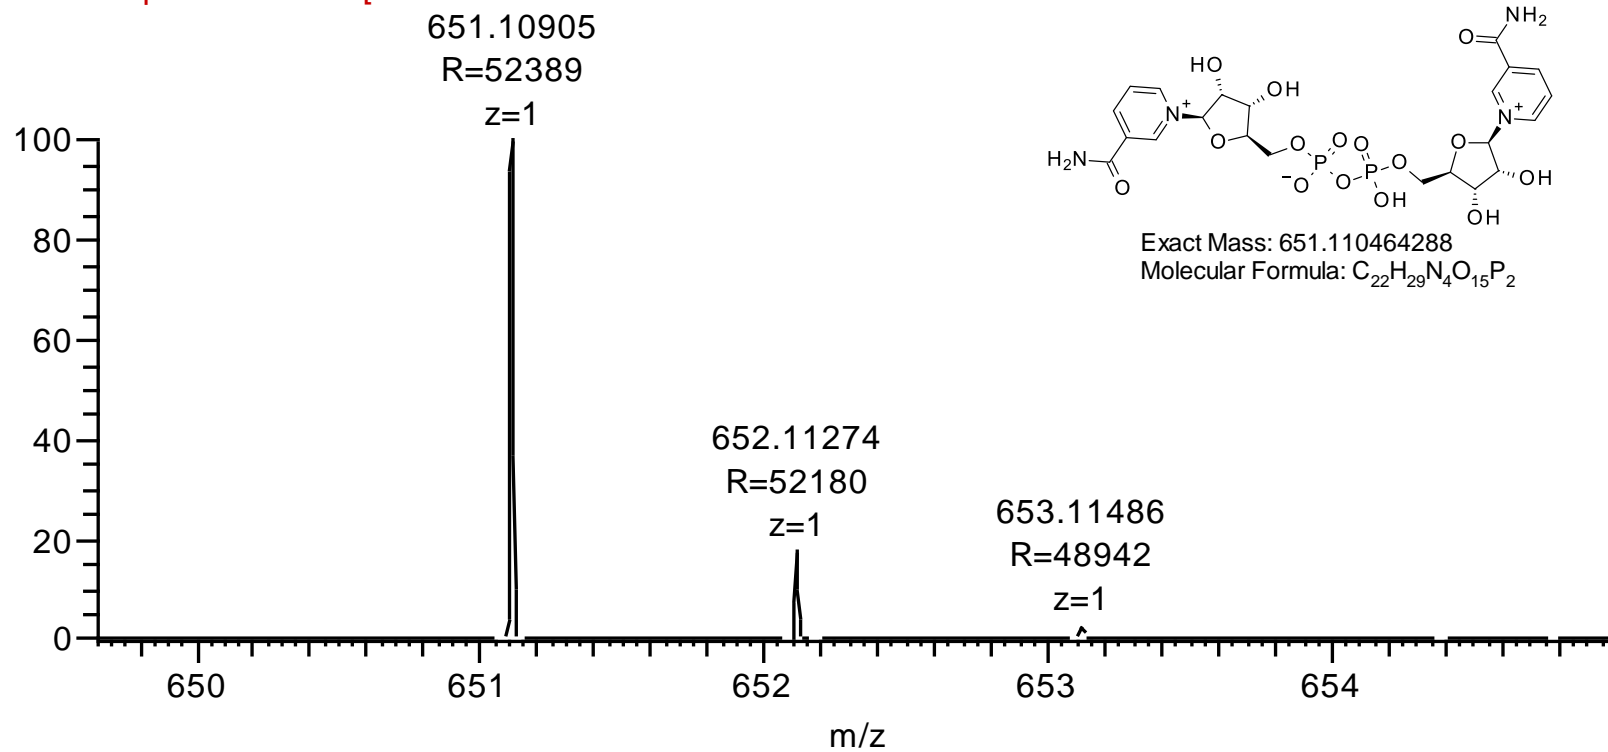

Compound 22. HRMS spectra

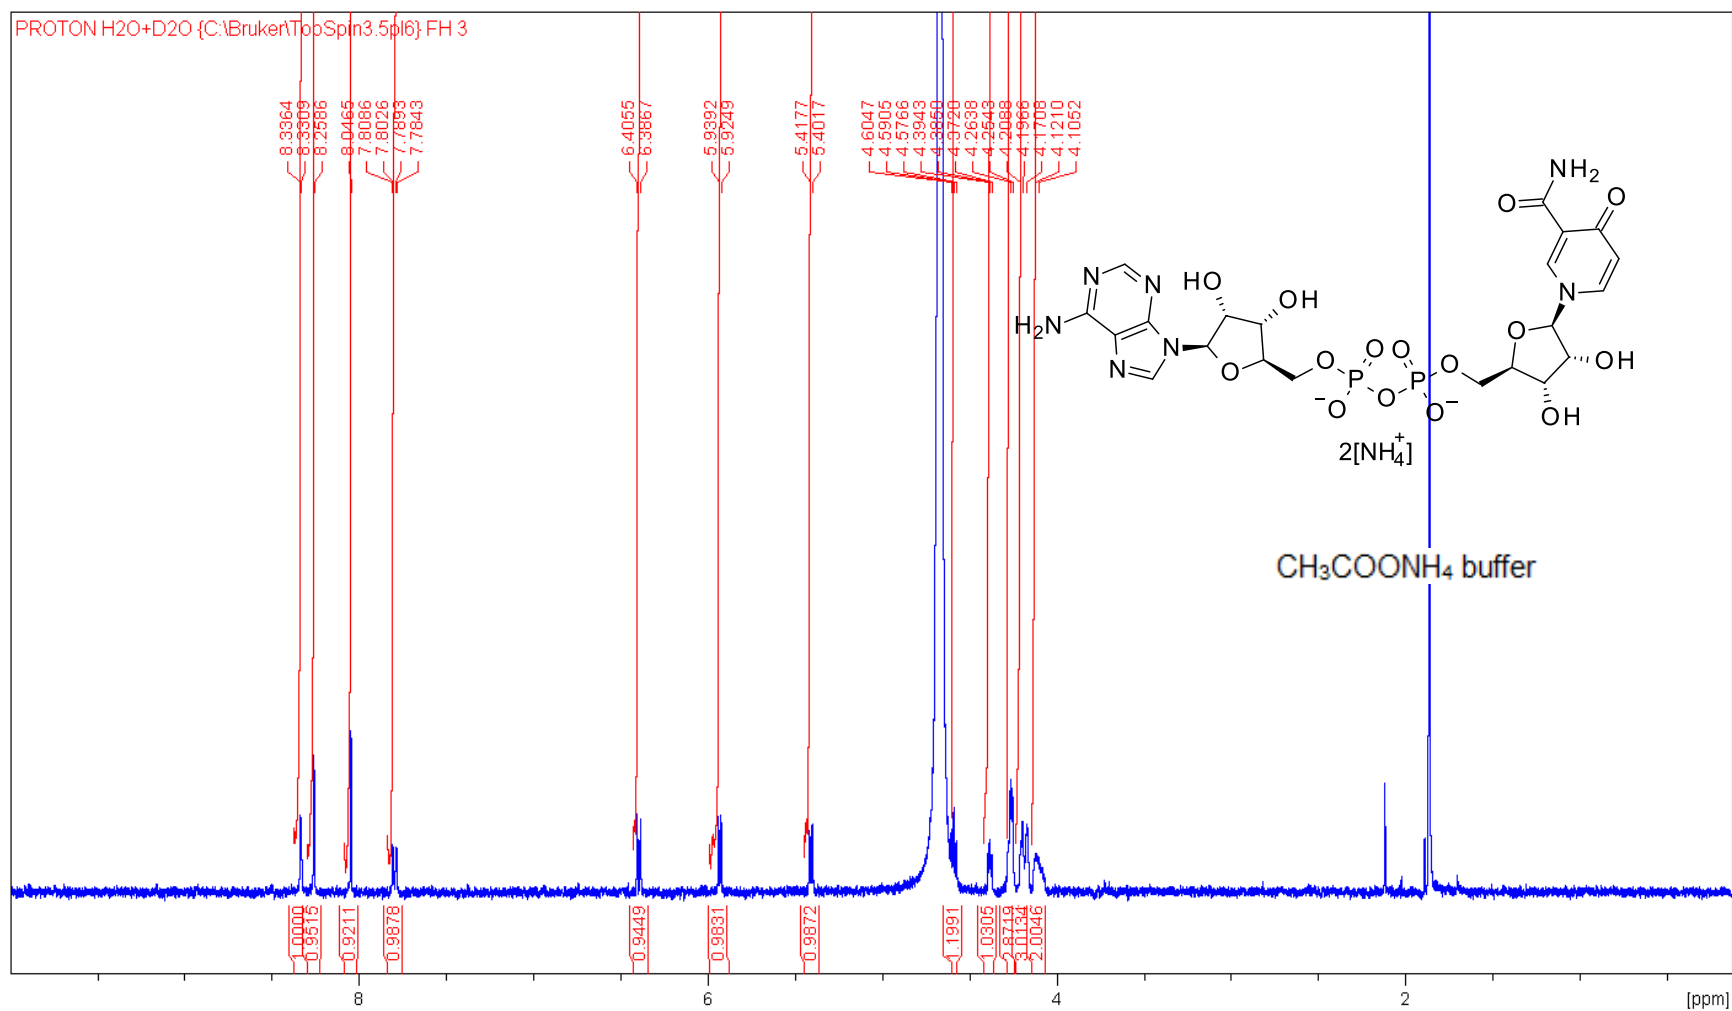

Compound 23. 400 MHz  $^1\text{H}$  NMR spectrum in  $\text{D}_2\text{O}$



C13CPD D2O {C:\Bruker\TopSpin3.5pl6} FH 14

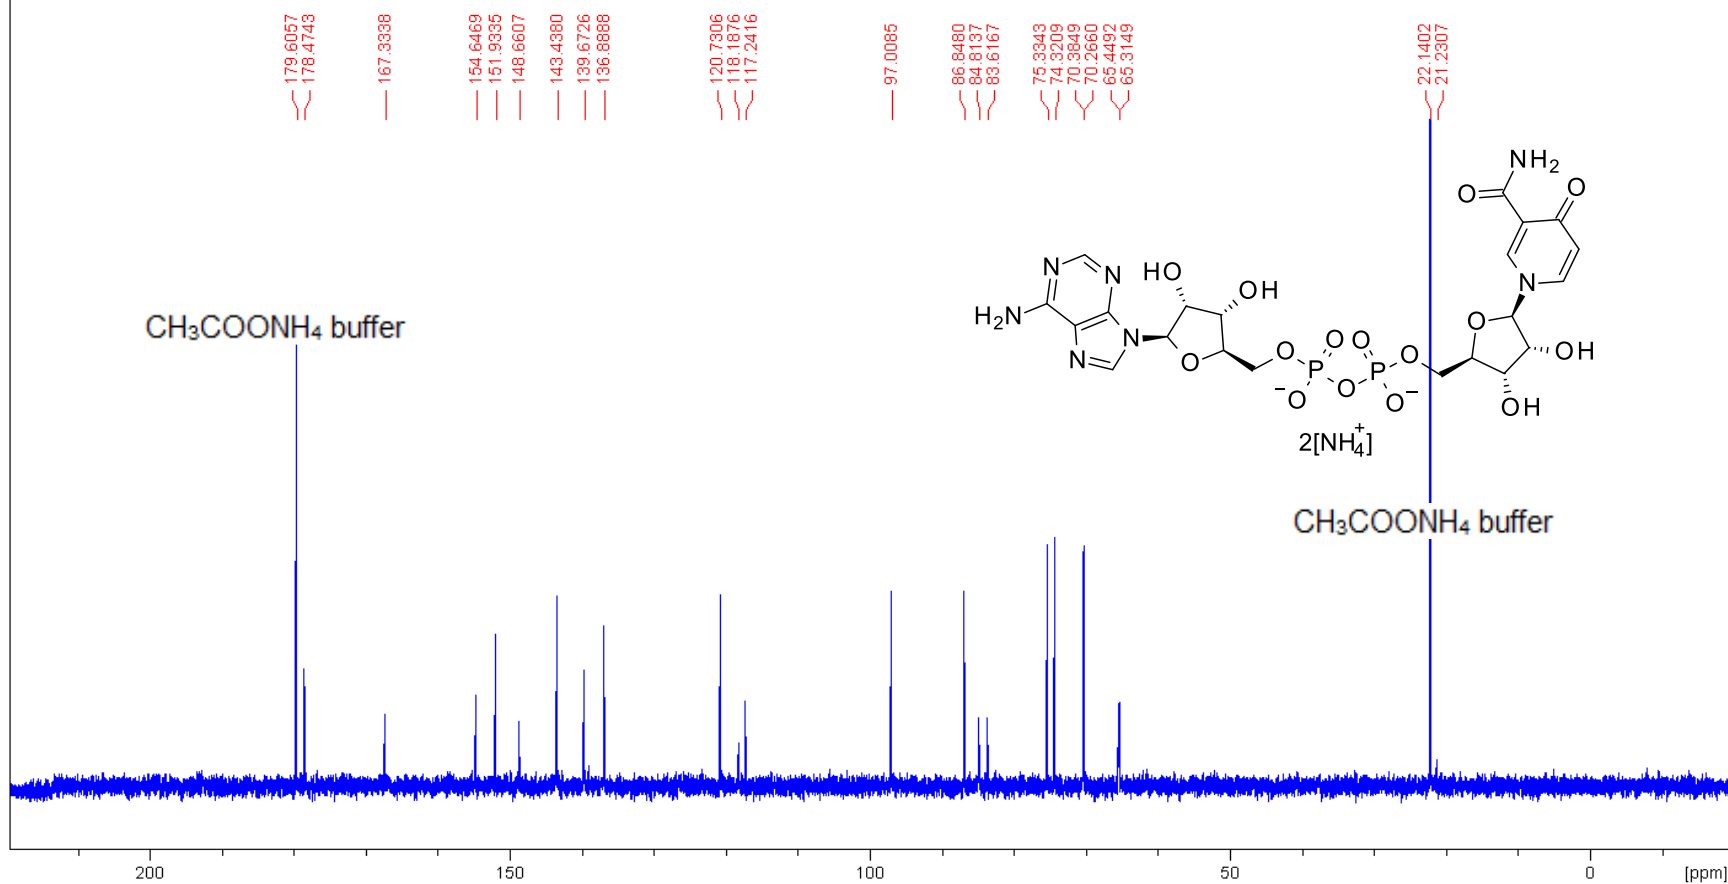

Compound 23. 100 MHz <sup>13</sup>C NMR spectrum in D<sub>2</sub>O

P31CPD H2O+D2O {C:\Bruker\TopSpin3.5pl6} FH 3

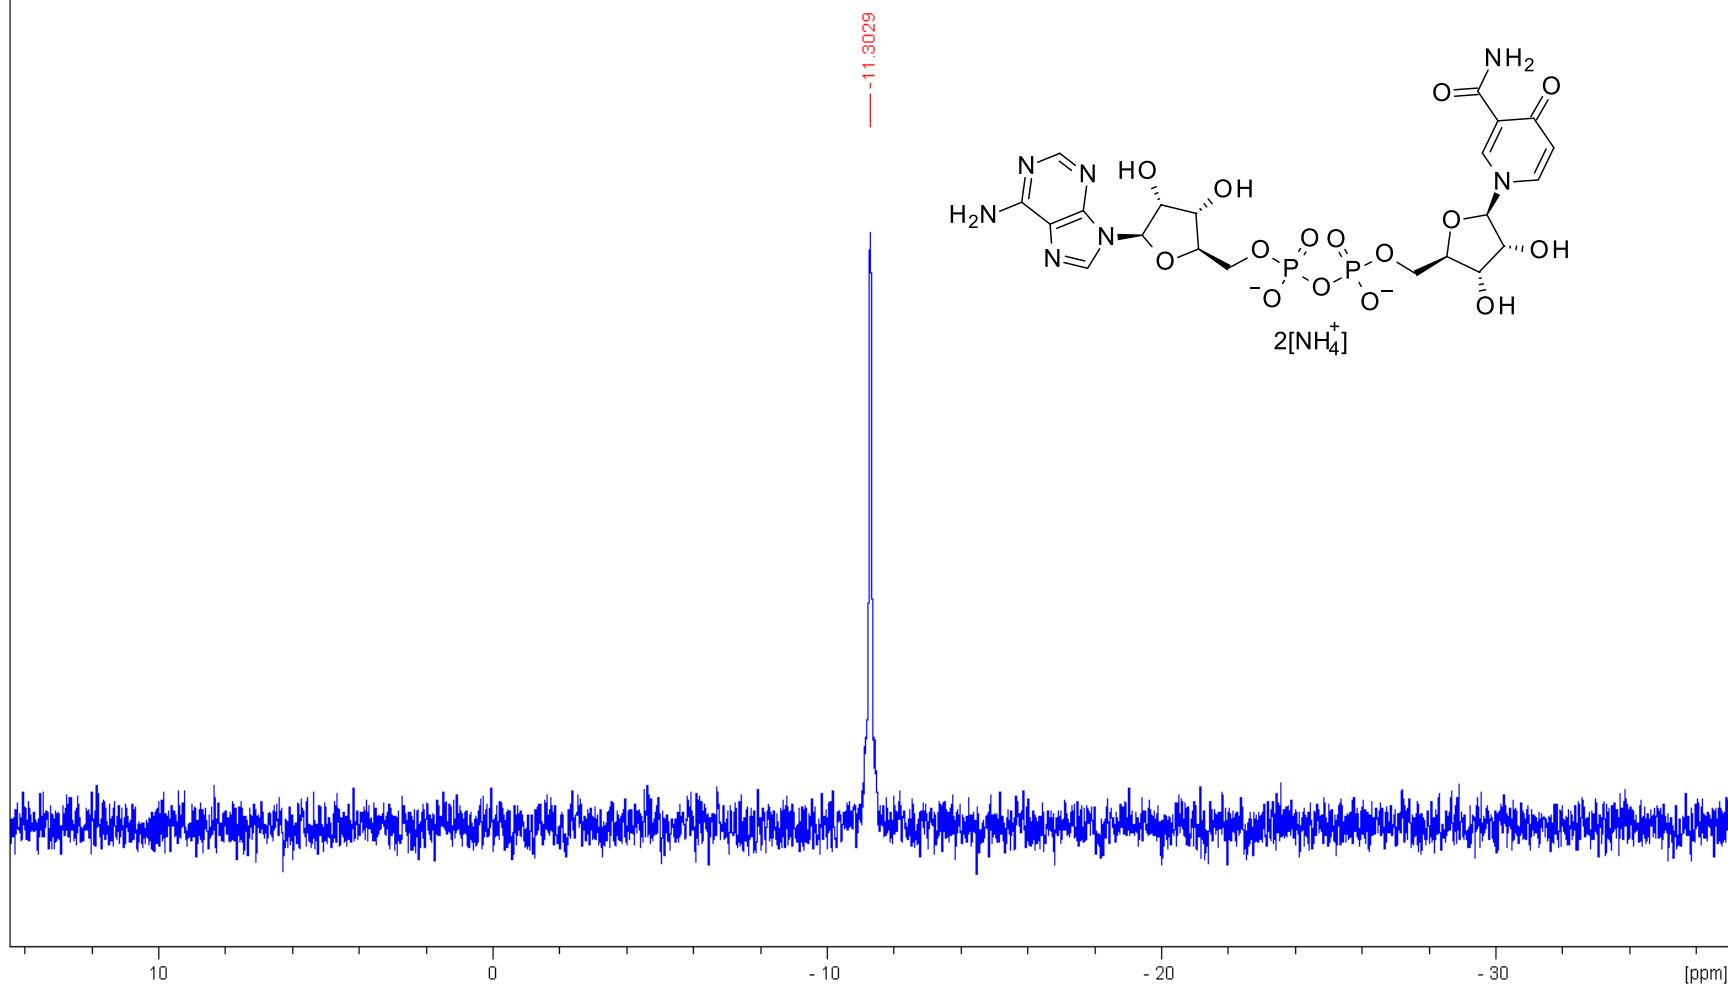

Compound 23. 162 MHz <sup>31</sup>P NMR spectrum in D<sub>2</sub>O

mm\_1119121\_4ndao\_02 #21-46 RT: 0.000000 min. 12E5

F: FTMS + p ESI Full ms [50.00-900.0]

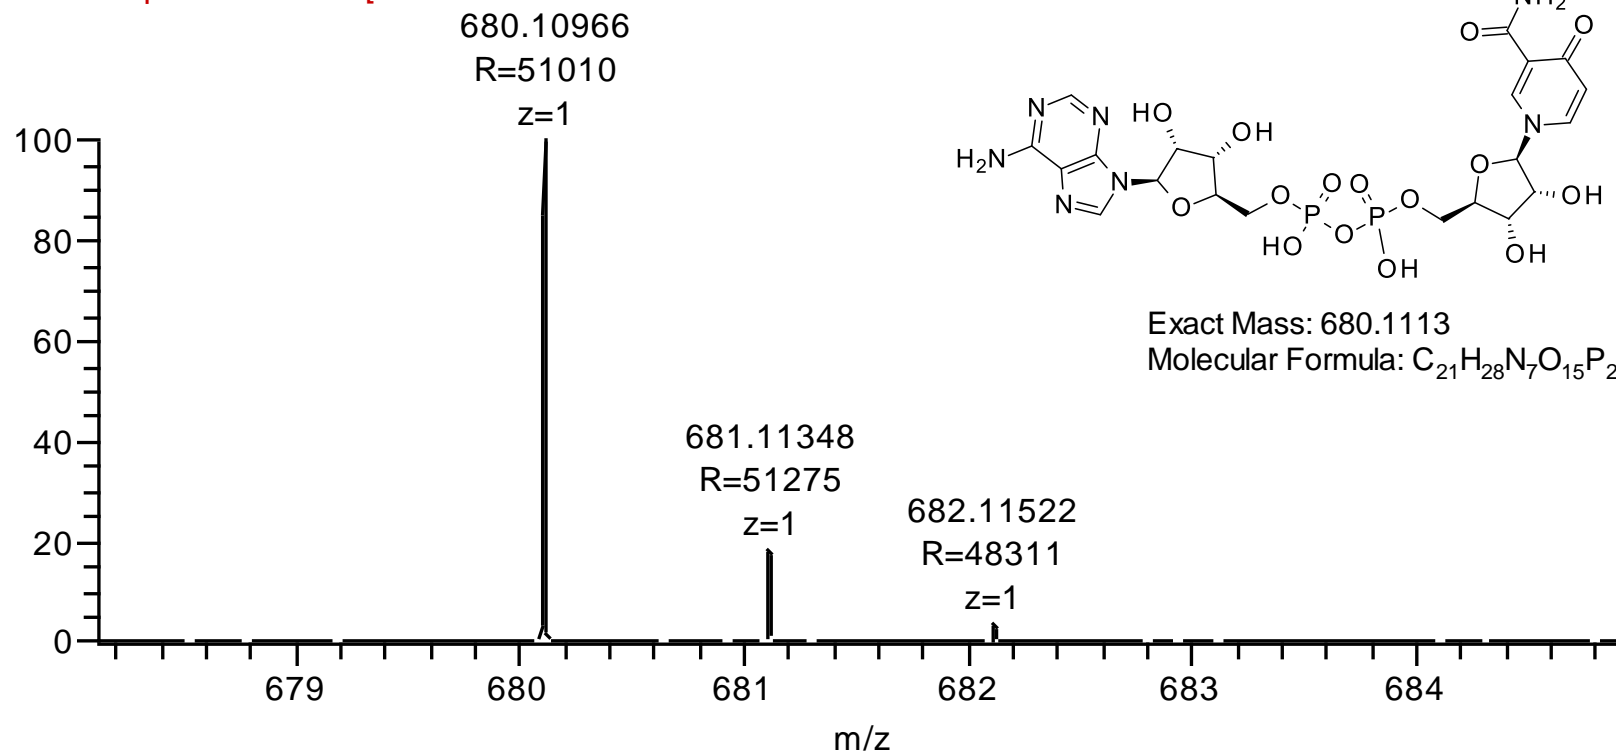

Compound 23. HRMS Spectra

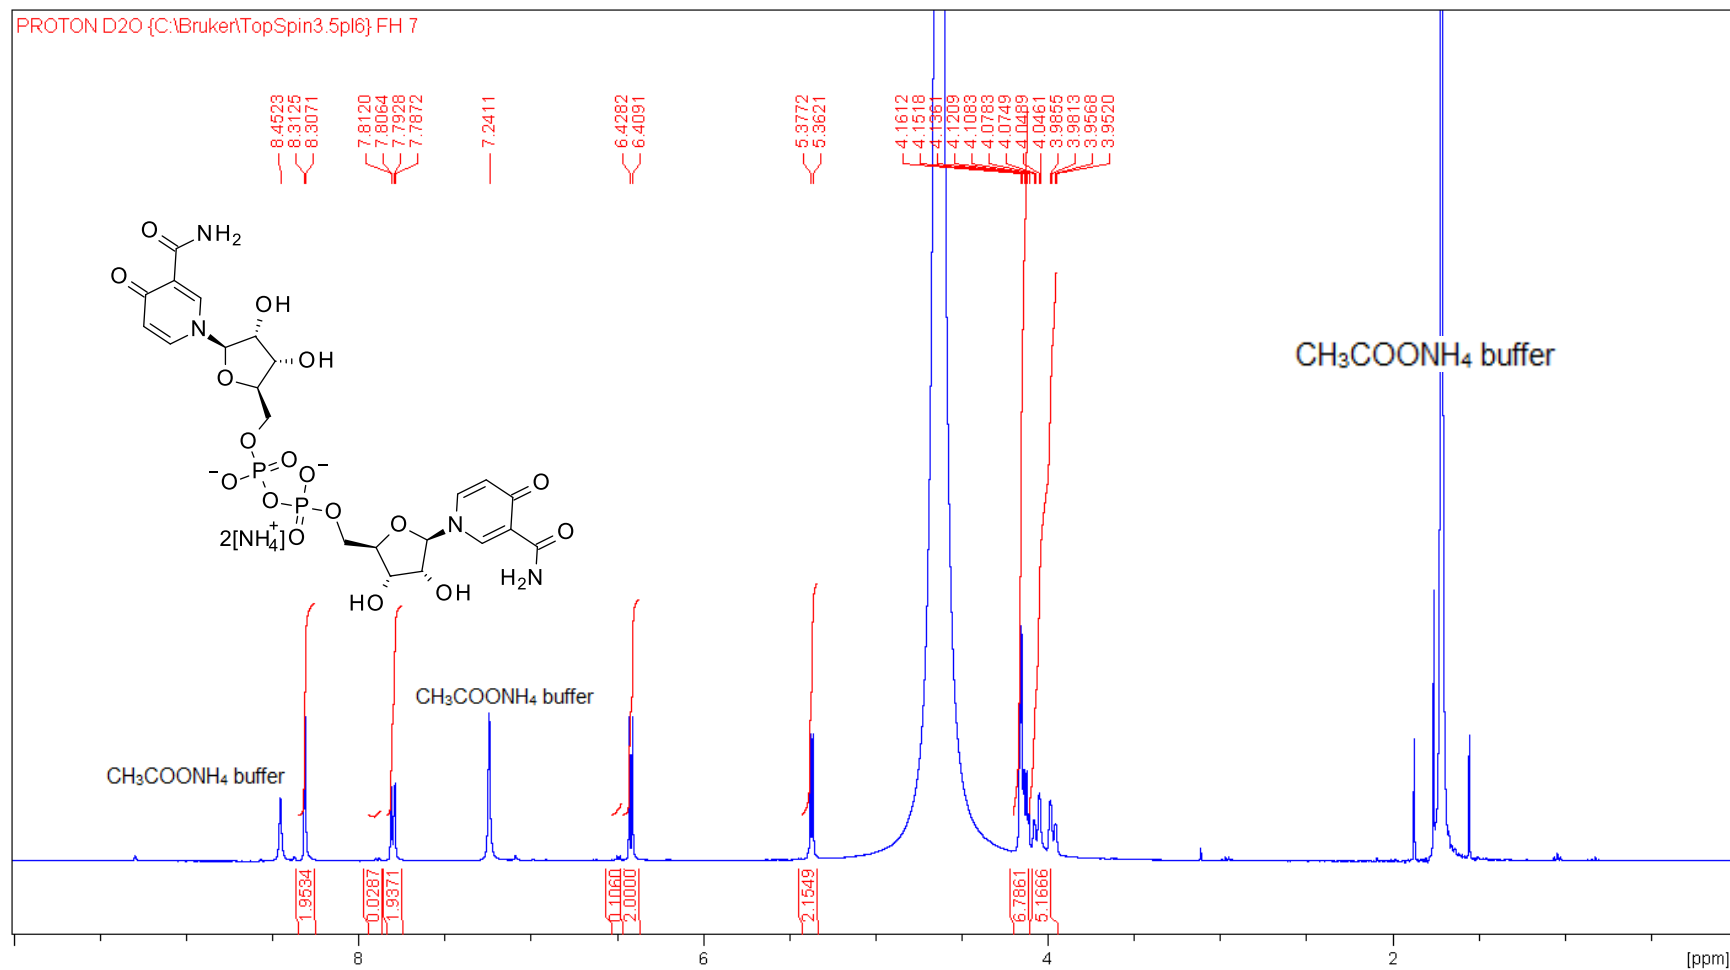

**Compound 24.** 400 MHz <sup>1</sup>H NMR spectrum in D<sub>2</sub>O

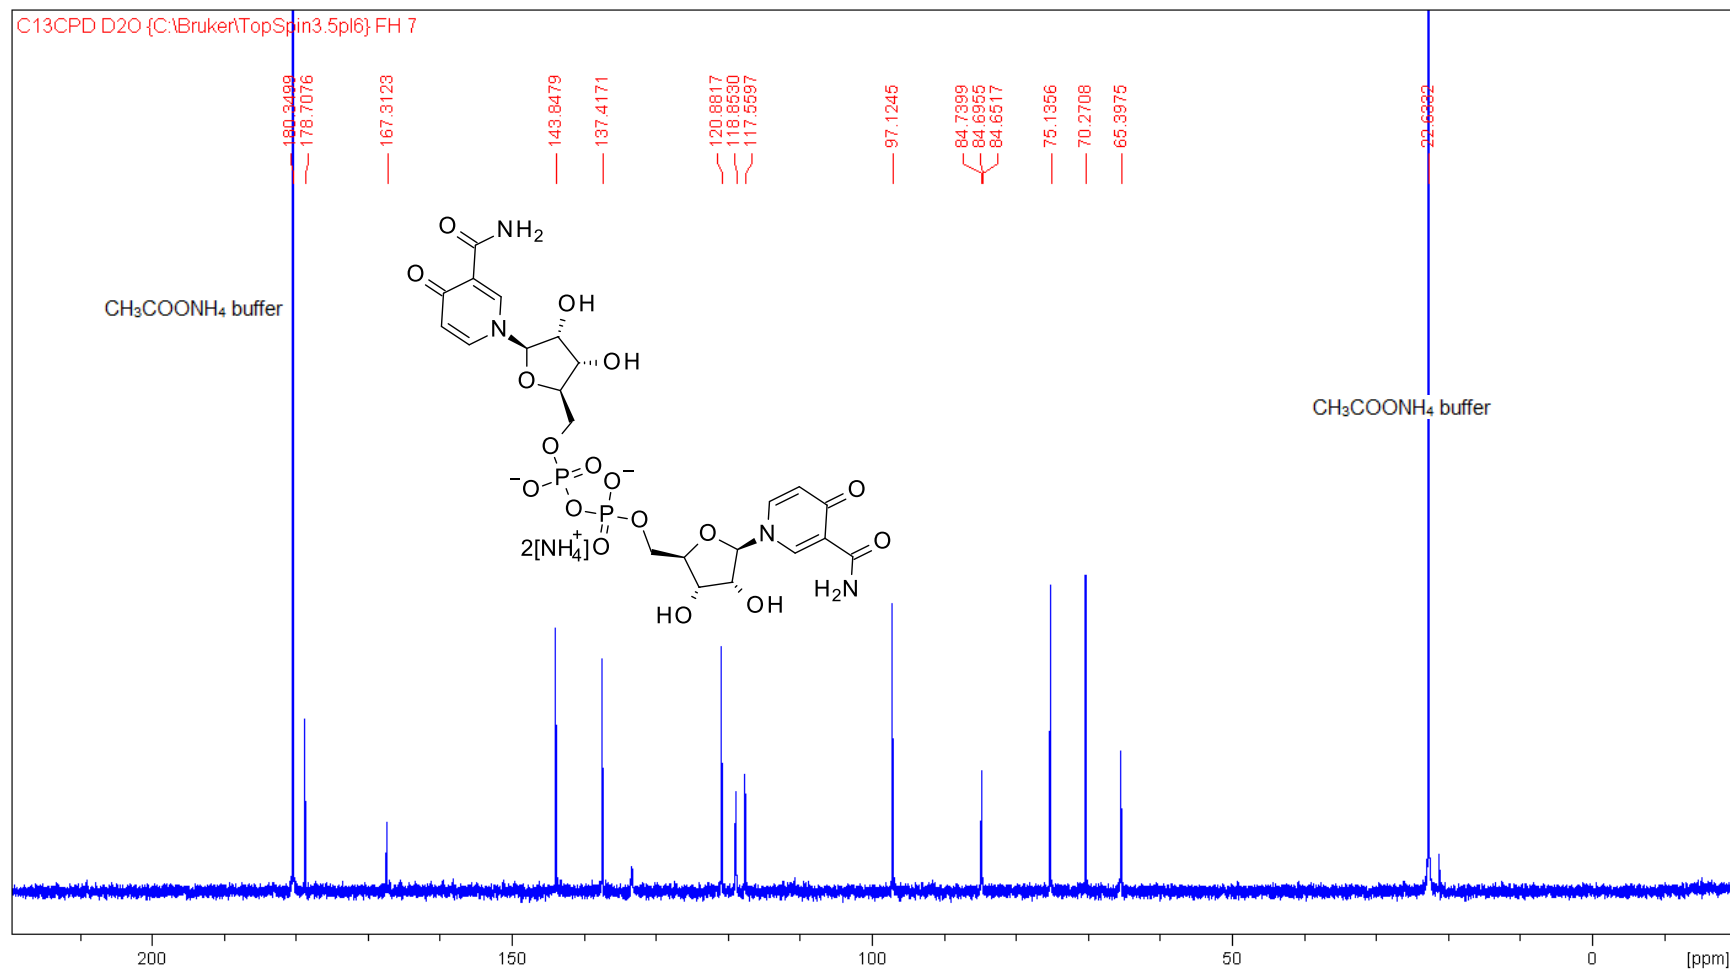

Compound 24. 100 MHz <sup>13</sup>C NMR spectrum in D<sub>2</sub>O

P31CPD D2O {C:\Bruker\TopSpin3.5pl6} FH 7

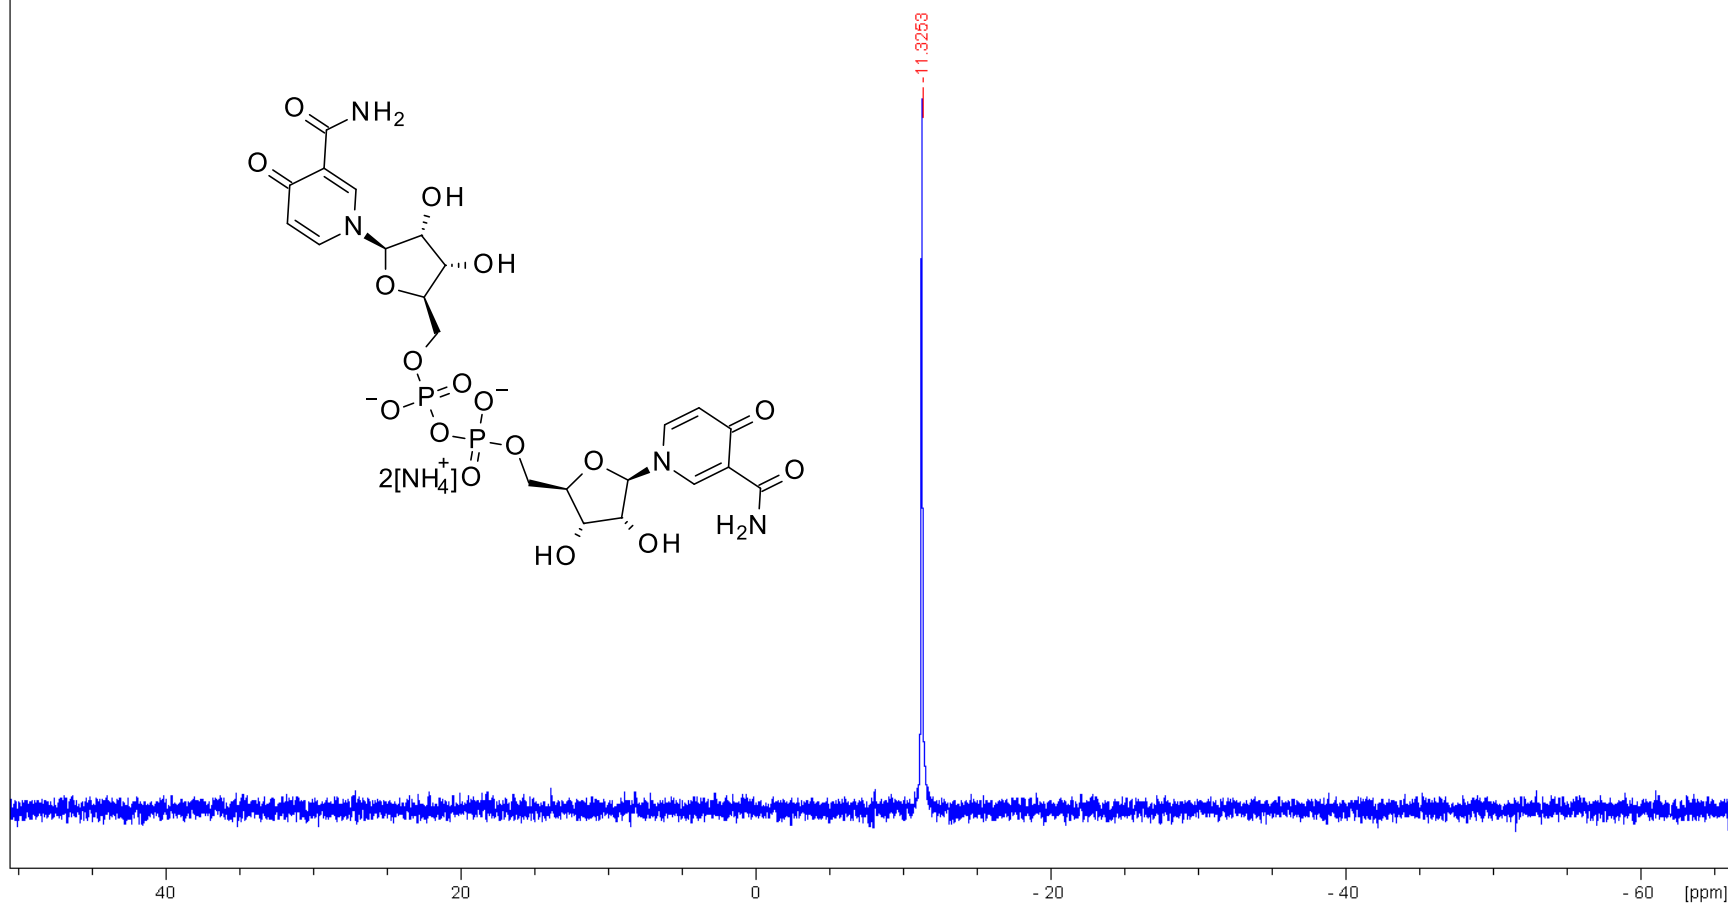

Compound 24. 162 MHz  $^{31}\text{P}$  NMR spectrum in  $\text{D}_2\text{O}$

mm\_1119121\_3\_double\_nmno\_02 #2042 RT: 0.20052 Min: 7 NL: 1.12E5

F: FTMS + p ESI Full ms [50.00-900.0]

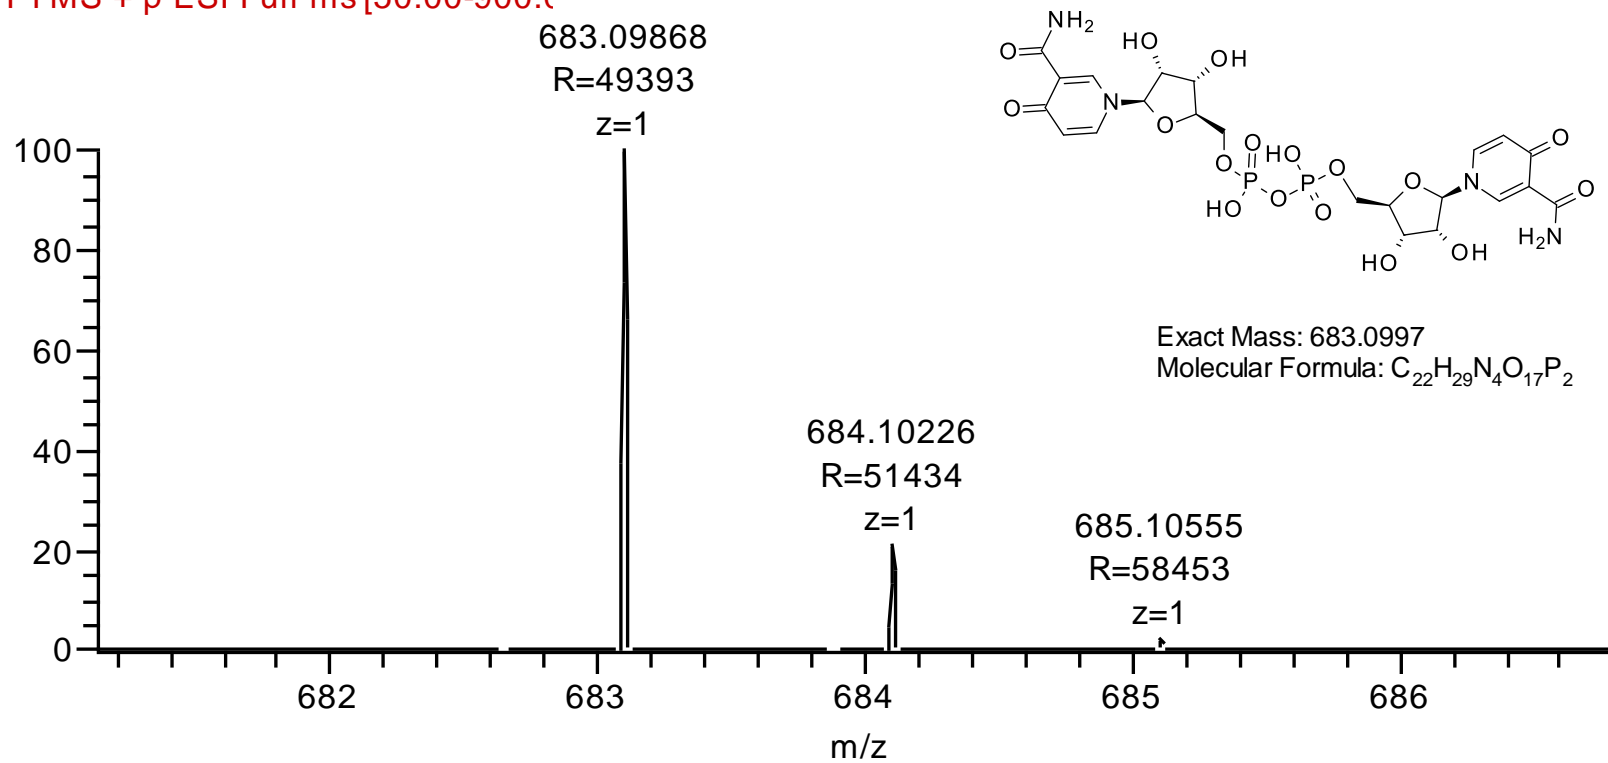

Compound 24. HRMS Sprctra

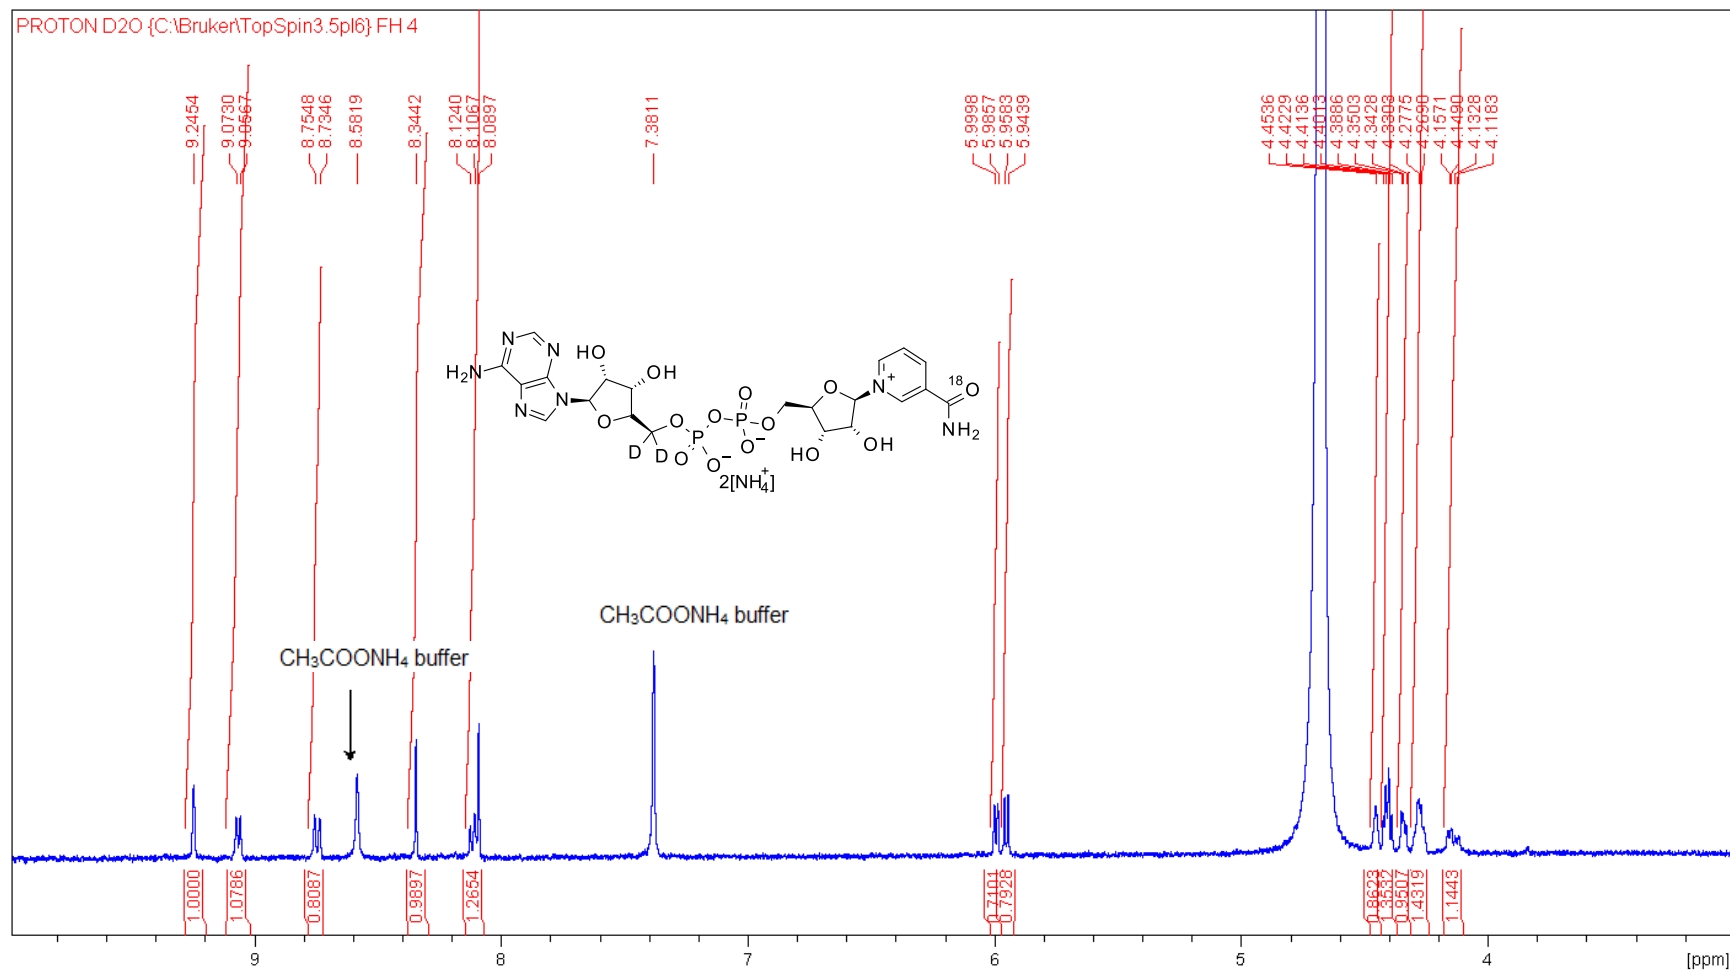

Compound 25. 400 MHz <sup>1</sup>H NMR spectrum in D<sub>2</sub>O



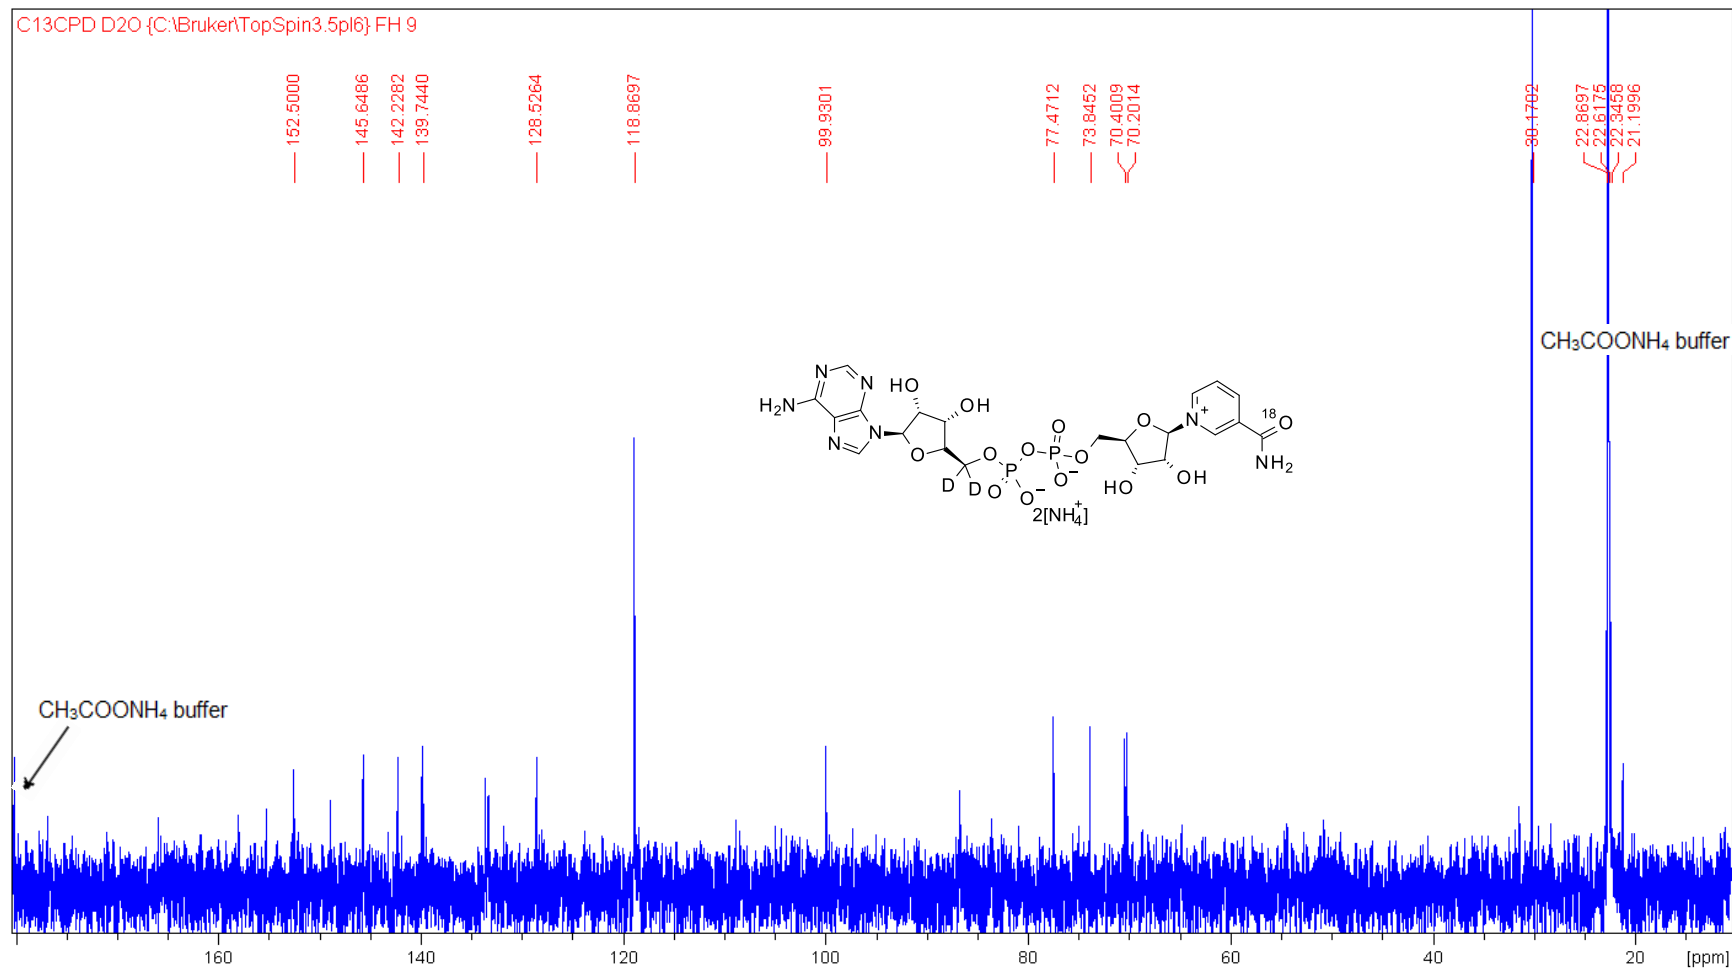

Compound 25. 100 MHz <sup>13</sup>C NMR spectrum in D<sub>2</sub>O

P31CPD D2O {C:\Bruker\TopSpin3.5pl6} FH 1

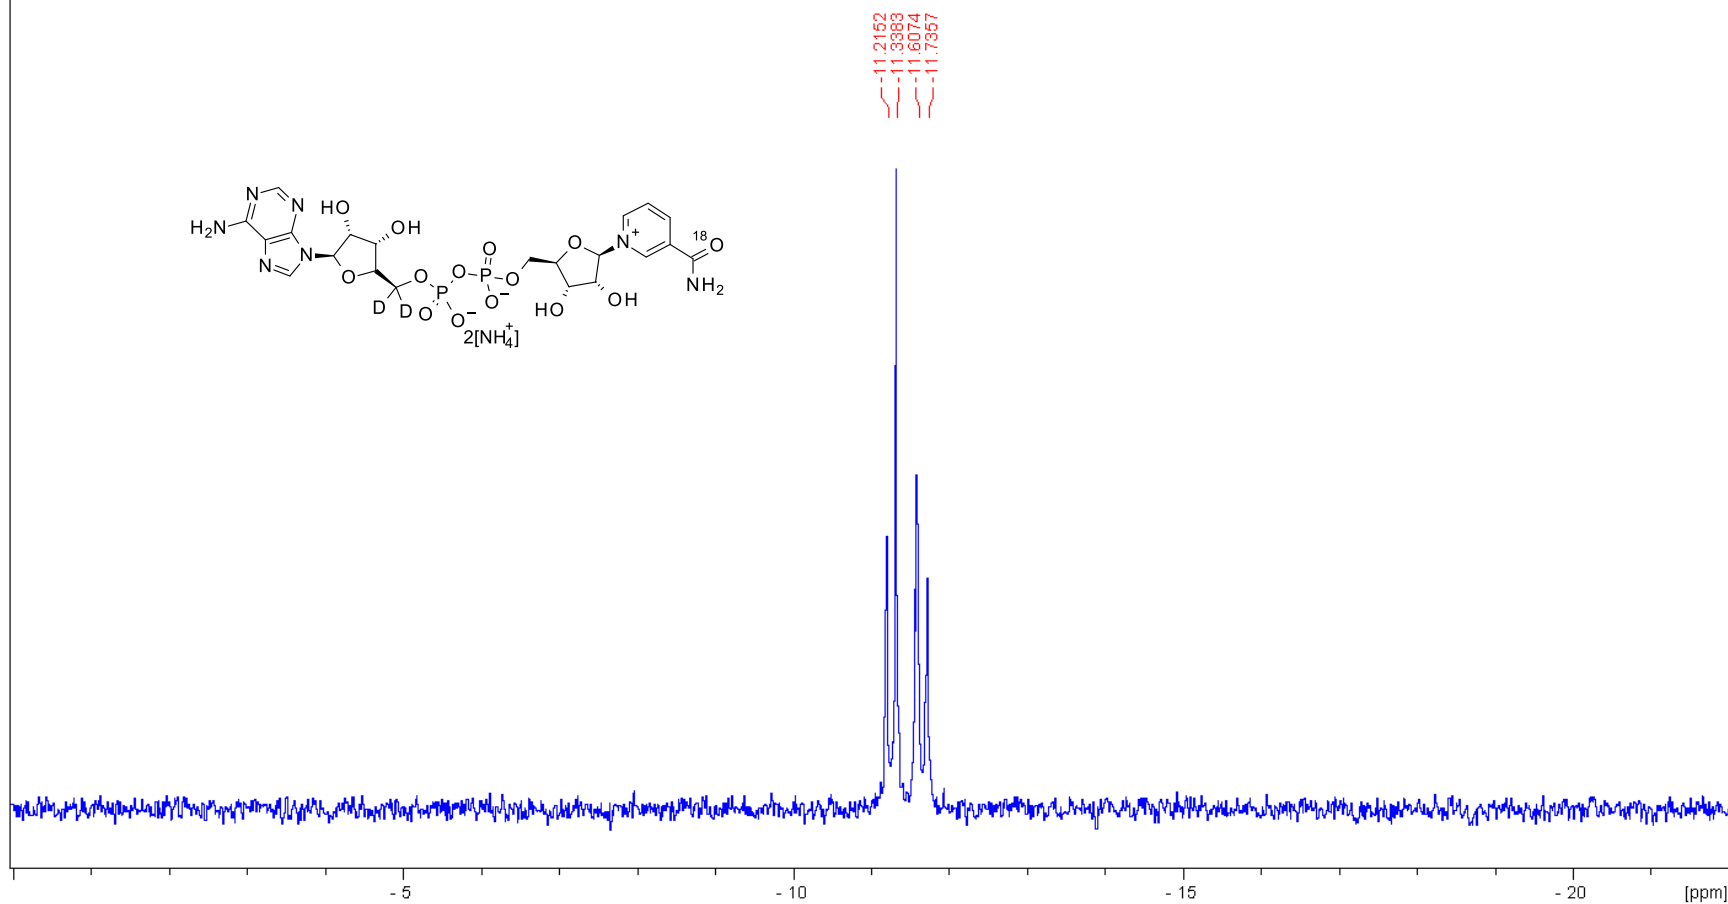

Compound 25. 162 MHz  $^{31}\text{P}$  NMR spectrum in  $\text{D}_2\text{O}$

Fisal-NAD\_direct\_infusion #15-59 RT: 0.23 min

F: FTMS + p ESI Full ms[110.00-700.00]

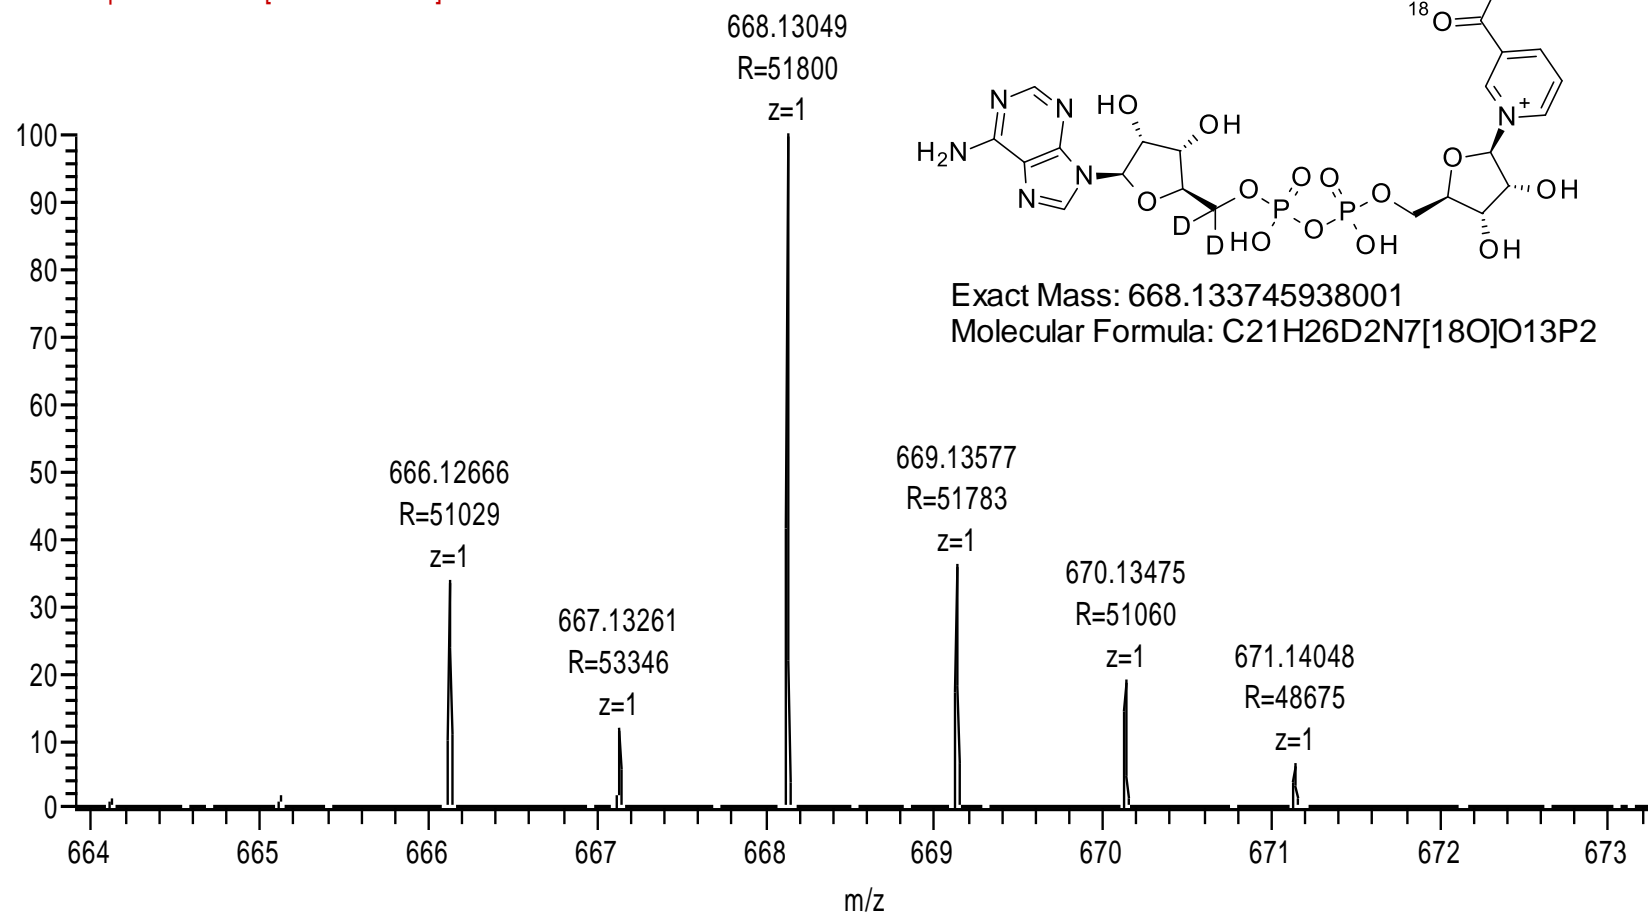

Compound 25. HRMS Spectra

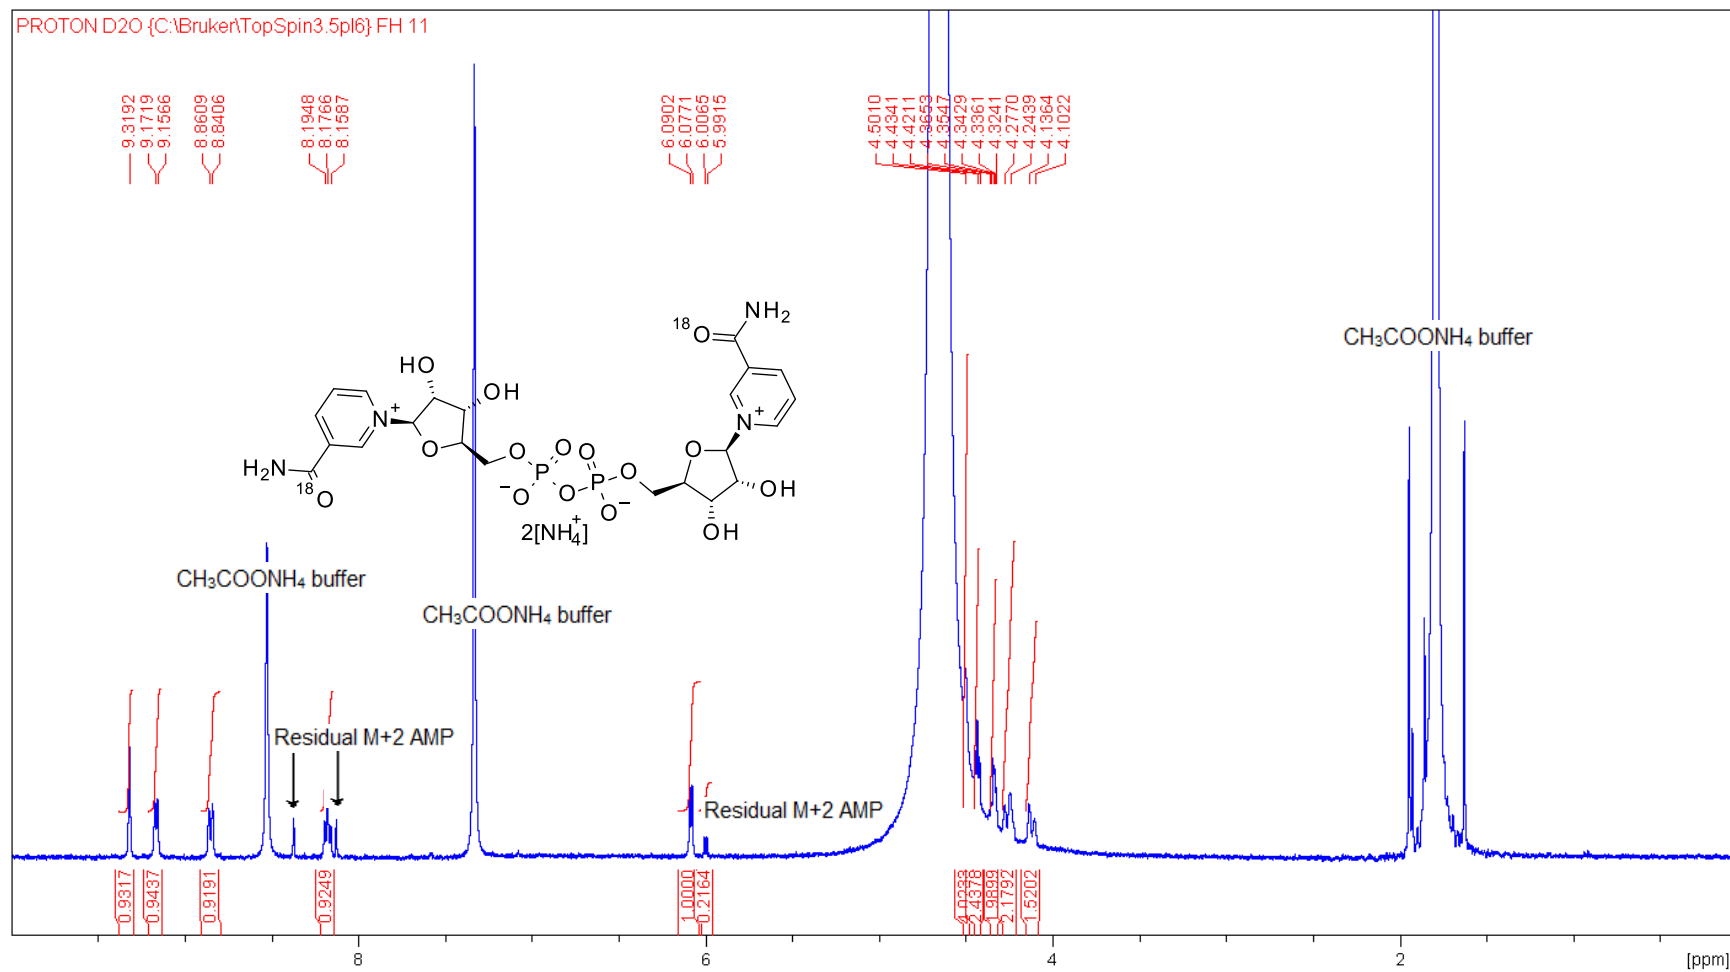

Compound 26. 400 MHz <sup>1</sup>H NMR spectrum in D<sub>2</sub>O

P31CPD D2O {C:\Bruker\TopSpin3.5pl6} FH 11

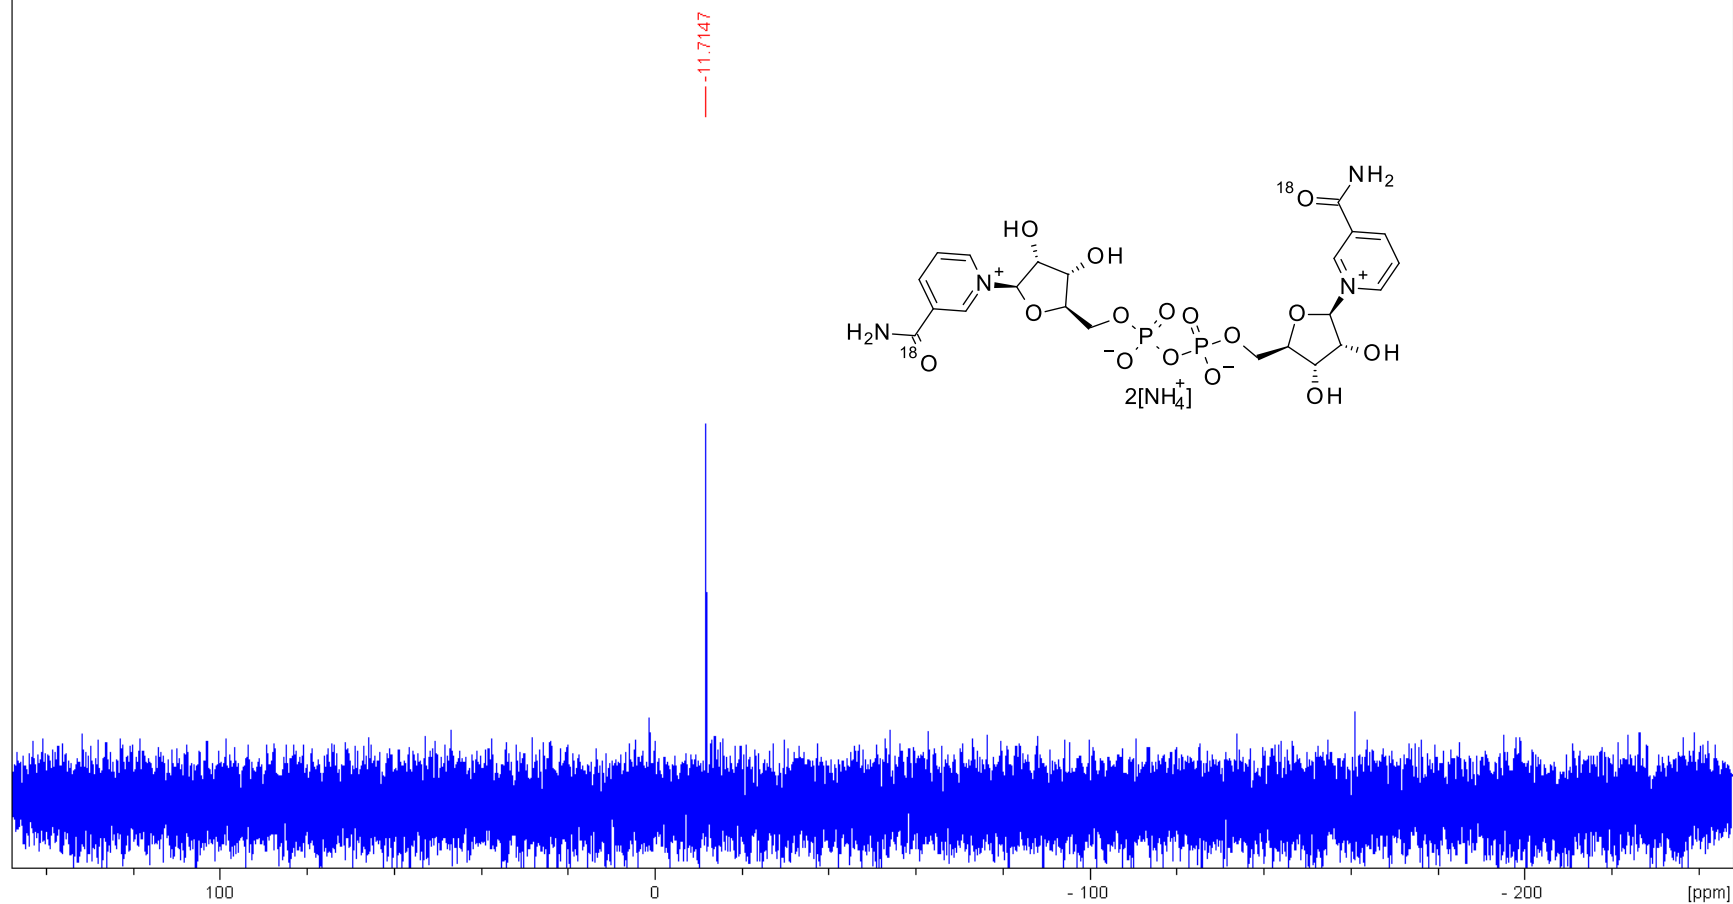

Compound 26. 162 MHz  $^{31}\text{P}$  NMR spectrum in  $\text{D}_2\text{O}$

mm\_061920\_double\_nmn\_pure\_04 #7-29 RT: 0.05-0.25 AV: 23 NL: 3.98E4  
F: (0.0) +p ESI!corona sid=75.00 det=918.00 Full ms [300.00-1000.00]

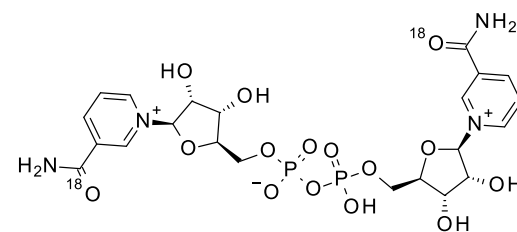

Exact Mass: 655.118955848001  
Molecular Formula: C<sub>22</sub>H<sub>29</sub>N<sub>4</sub>[<sup>18</sup>O]<sub>2</sub>O<sub>13</sub>P<sub>2</sub>

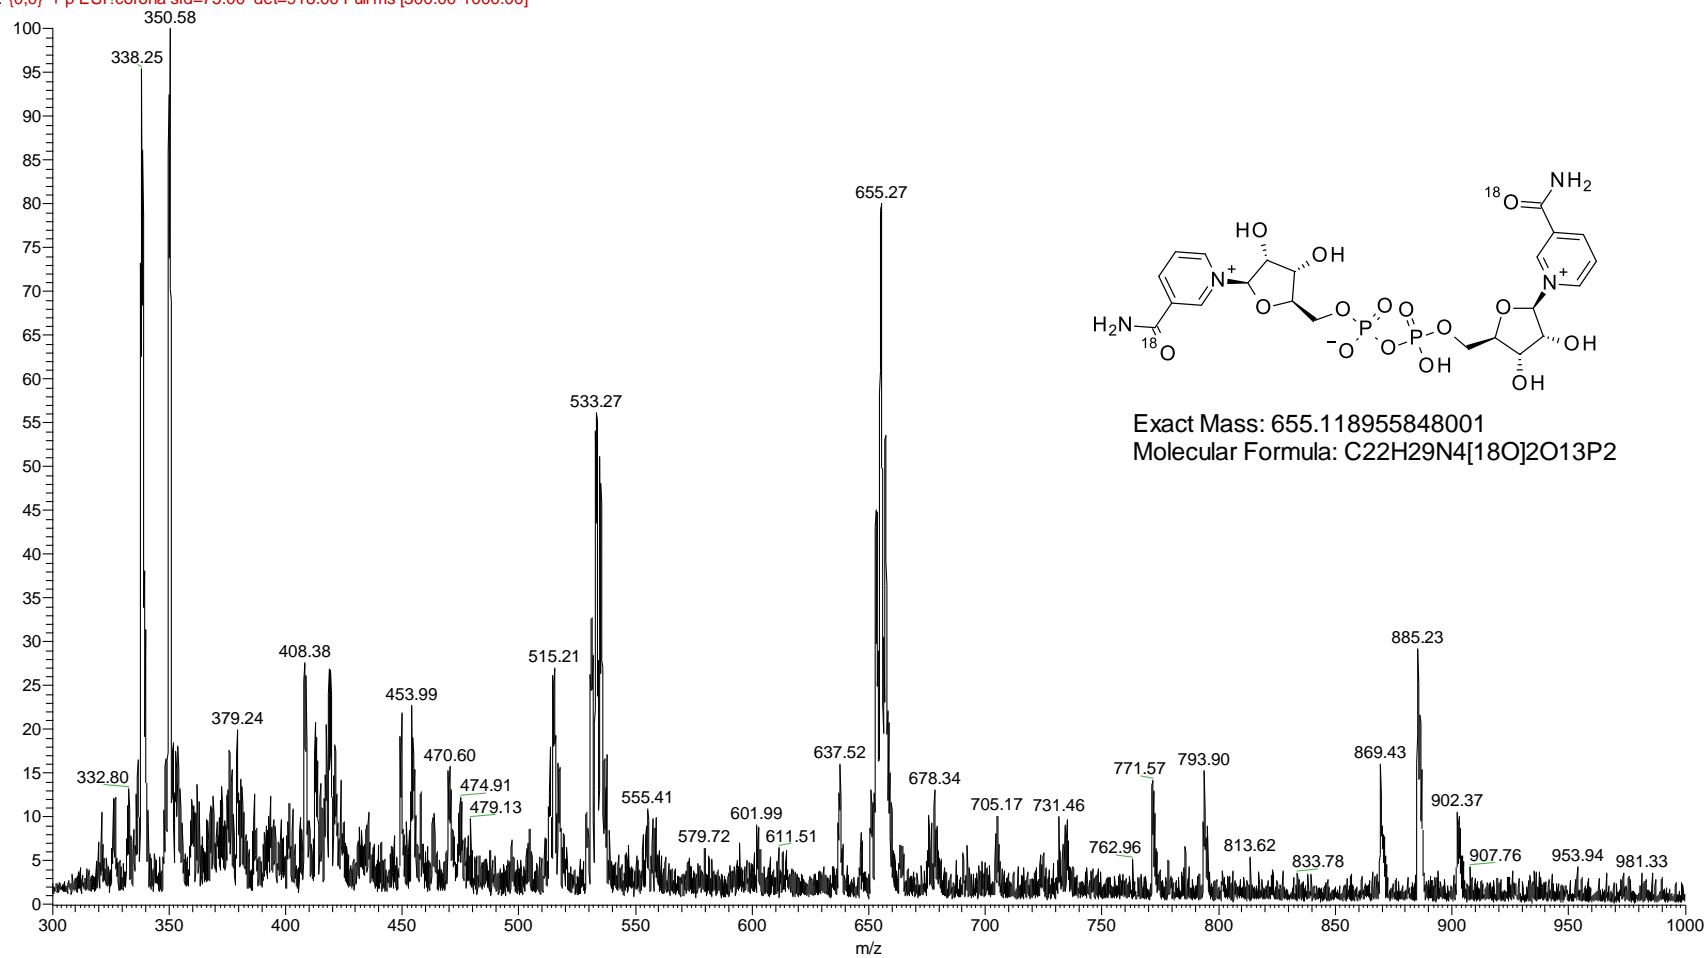

Compound 26. ESI-MS spectra

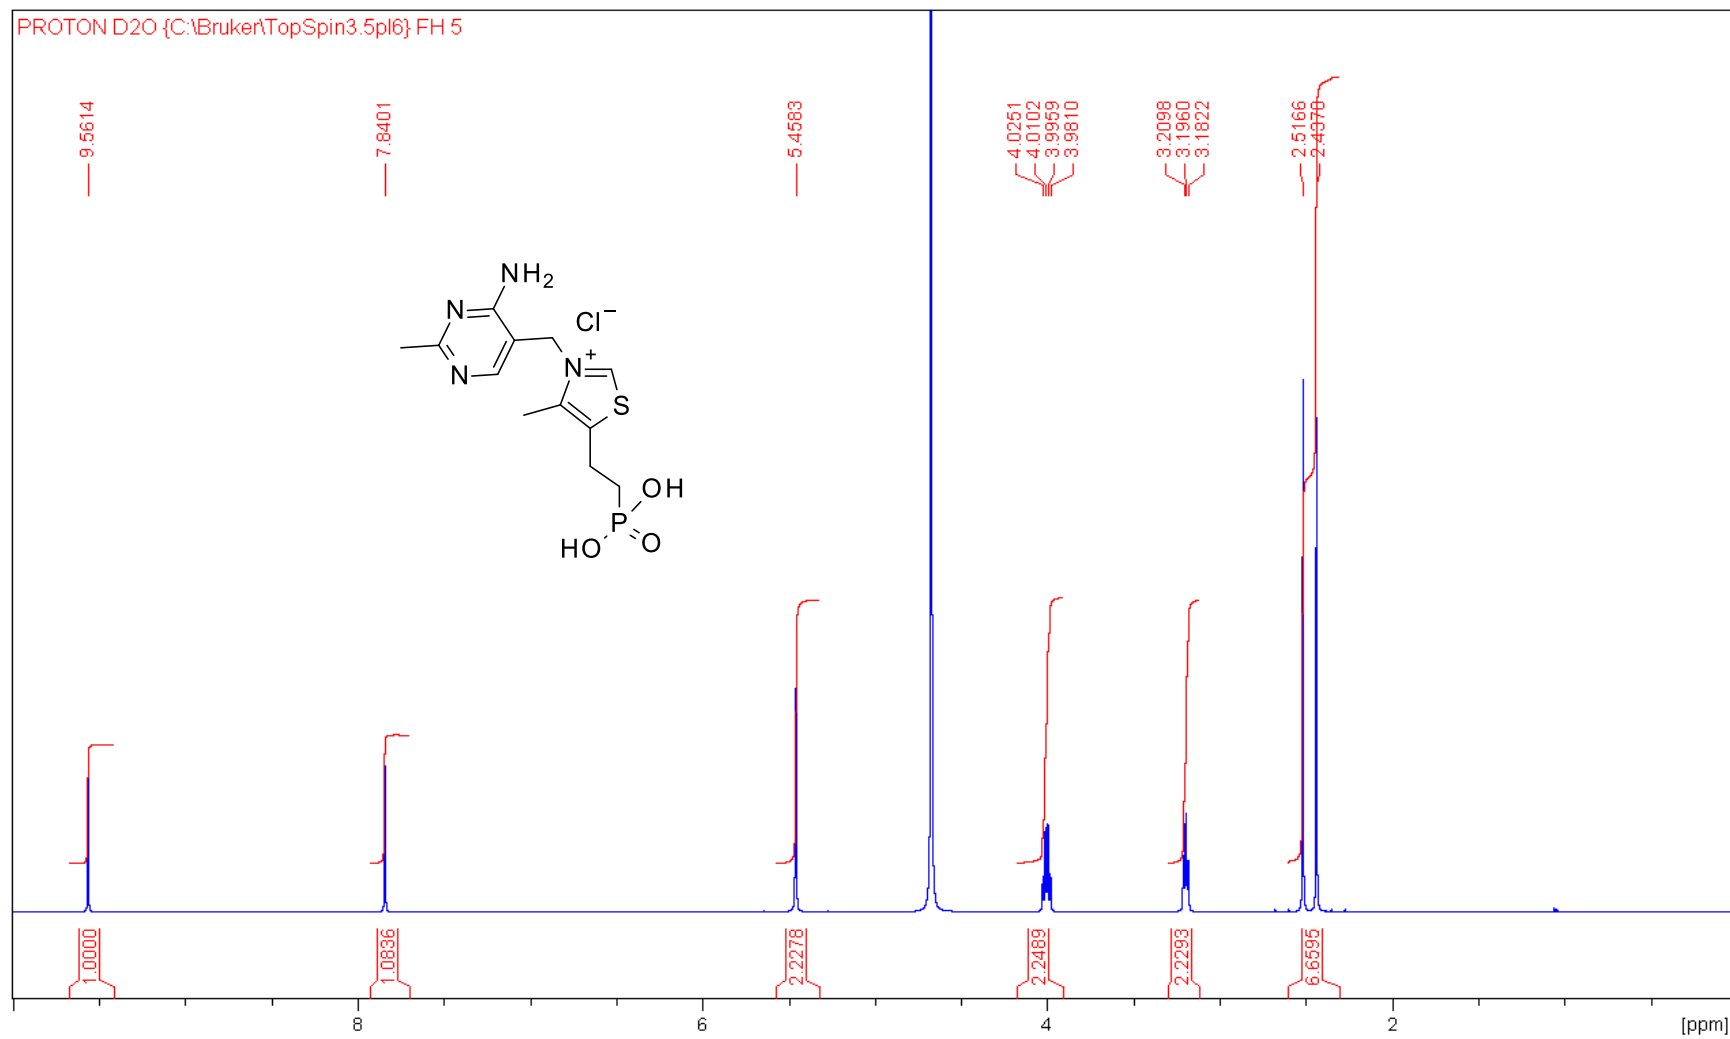

Compound 28. 400 MHz  $^1\text{H}$  NMR spectrum in  $\text{D}_2\text{O}$

C13CPD D2O {C:\Bruker\TopSpin3.5pl6} FH 5

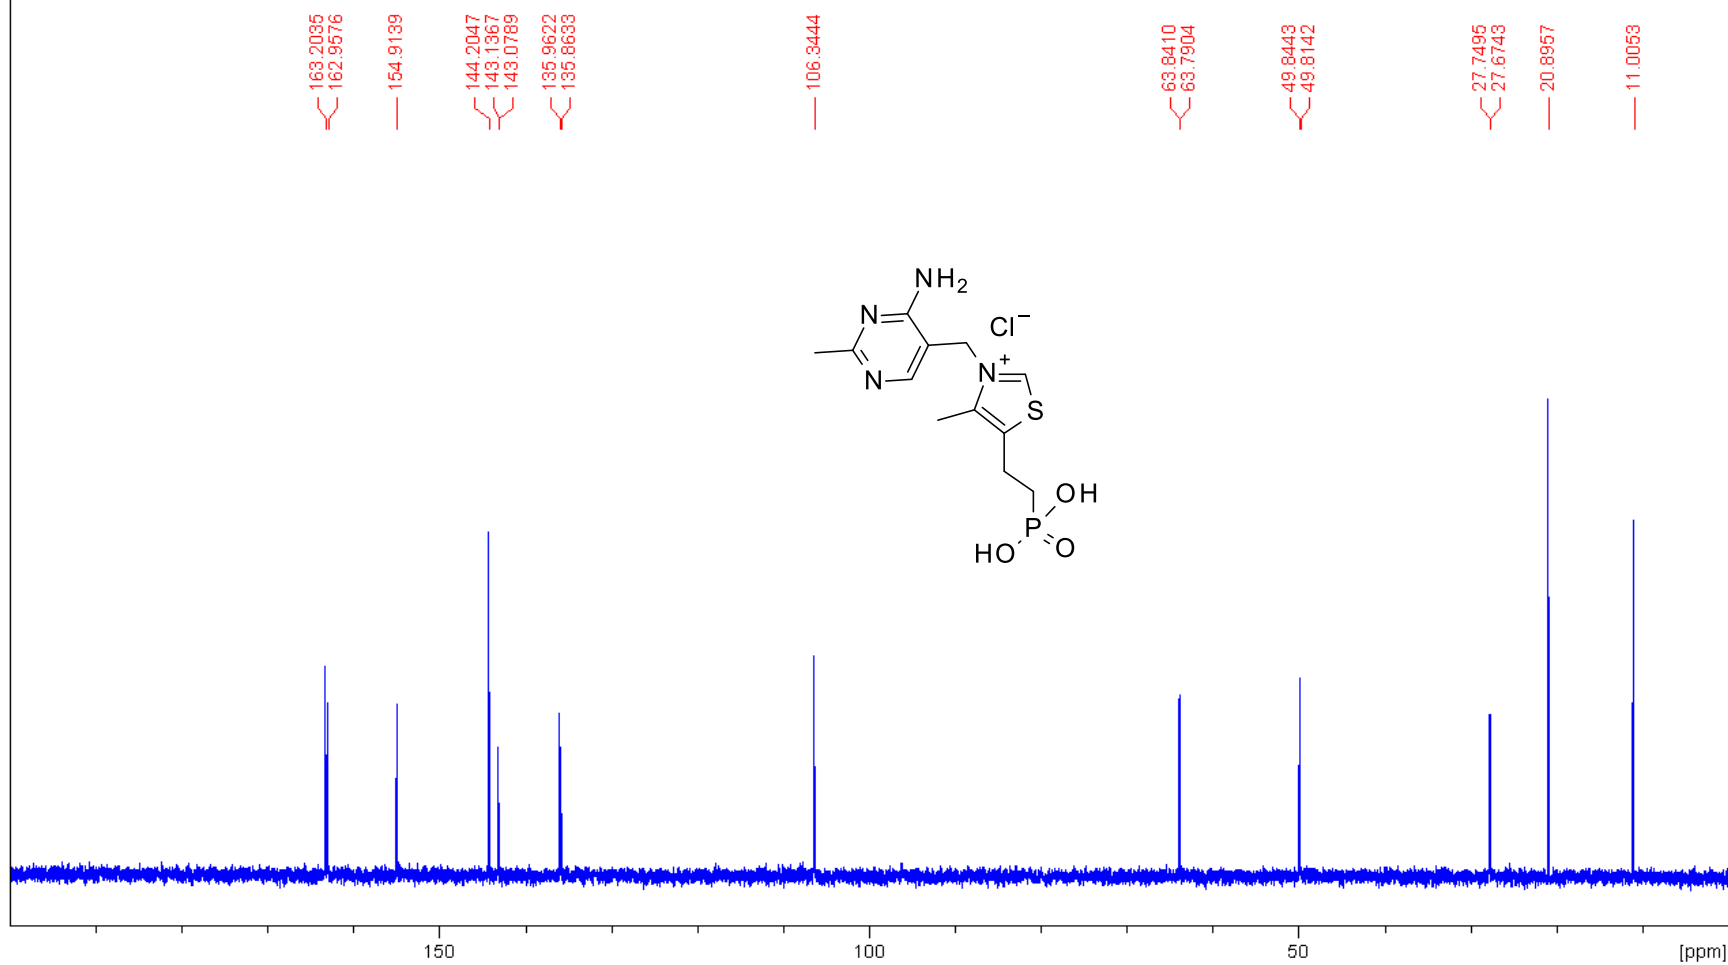

Compound 28. 100 MHz  $^{13}\text{C}$  NMR spectrum in  $\text{D}_2\text{O}$



P31CPD D2O {C:\Bruker\TopSpin3.5pl6} FH 5

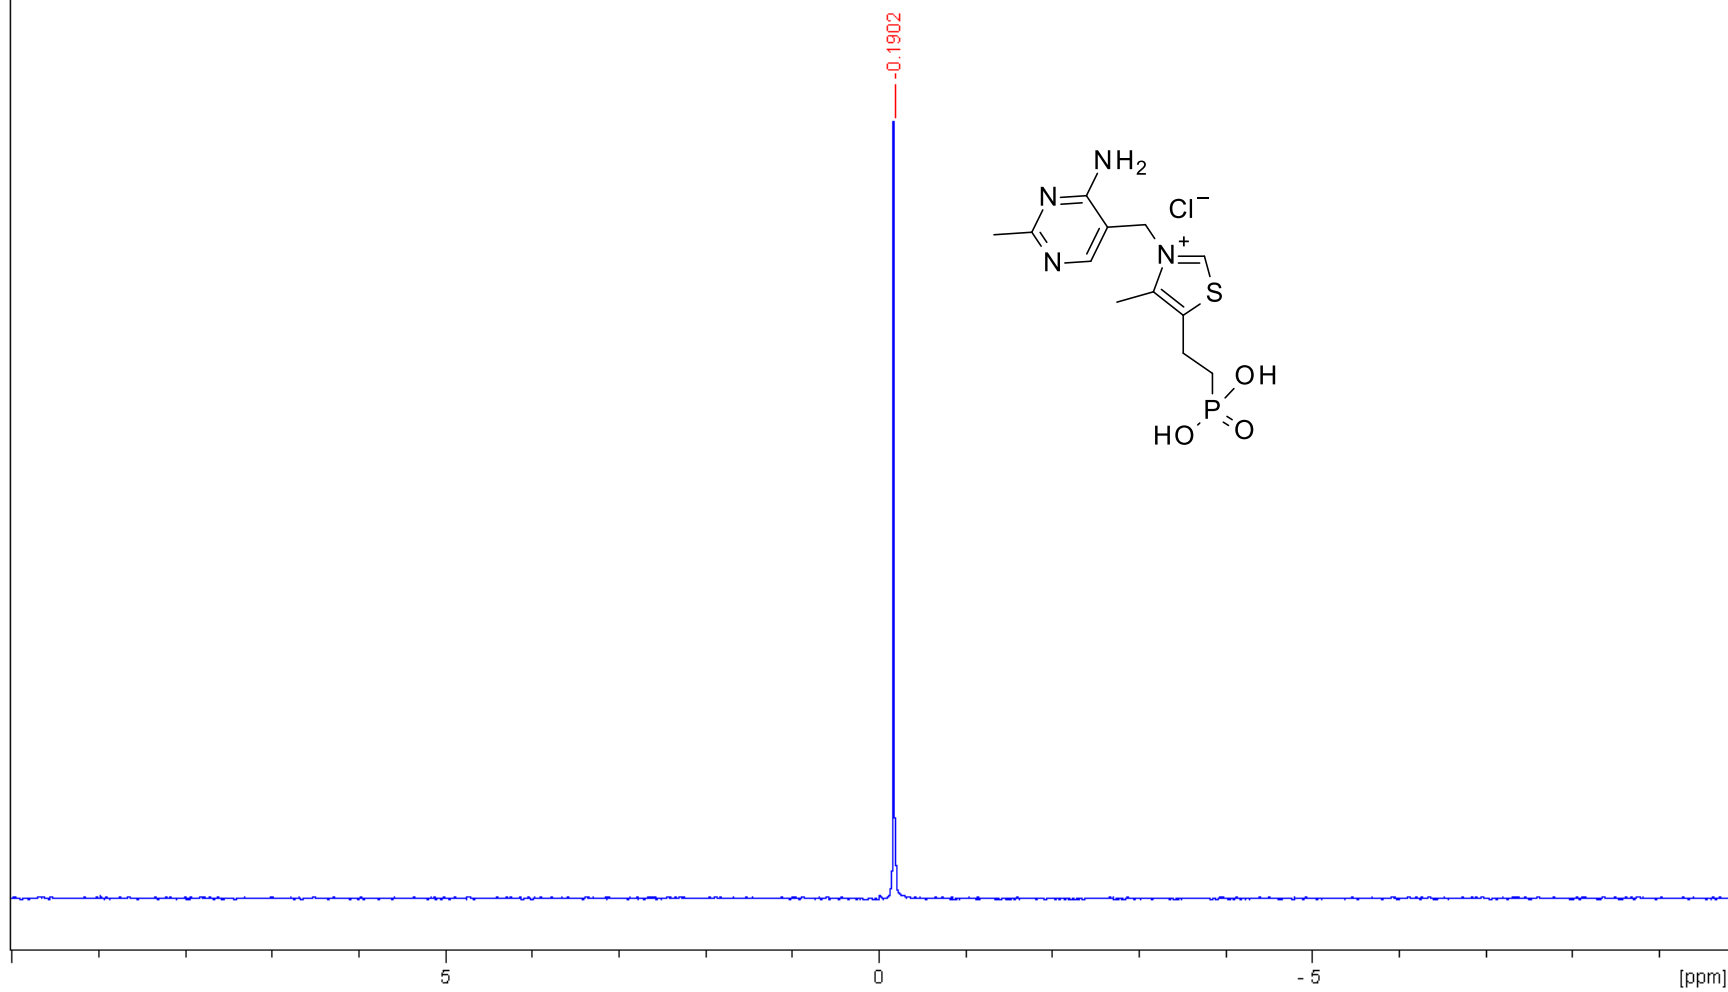

Compound 28. 162 MHz  $^{31}\text{P}$  NMR spectrum in  $\text{D}_2\text{O}$

P31CPD D2O {C:\Bruker\TopSpin3.5pl6} FH 11

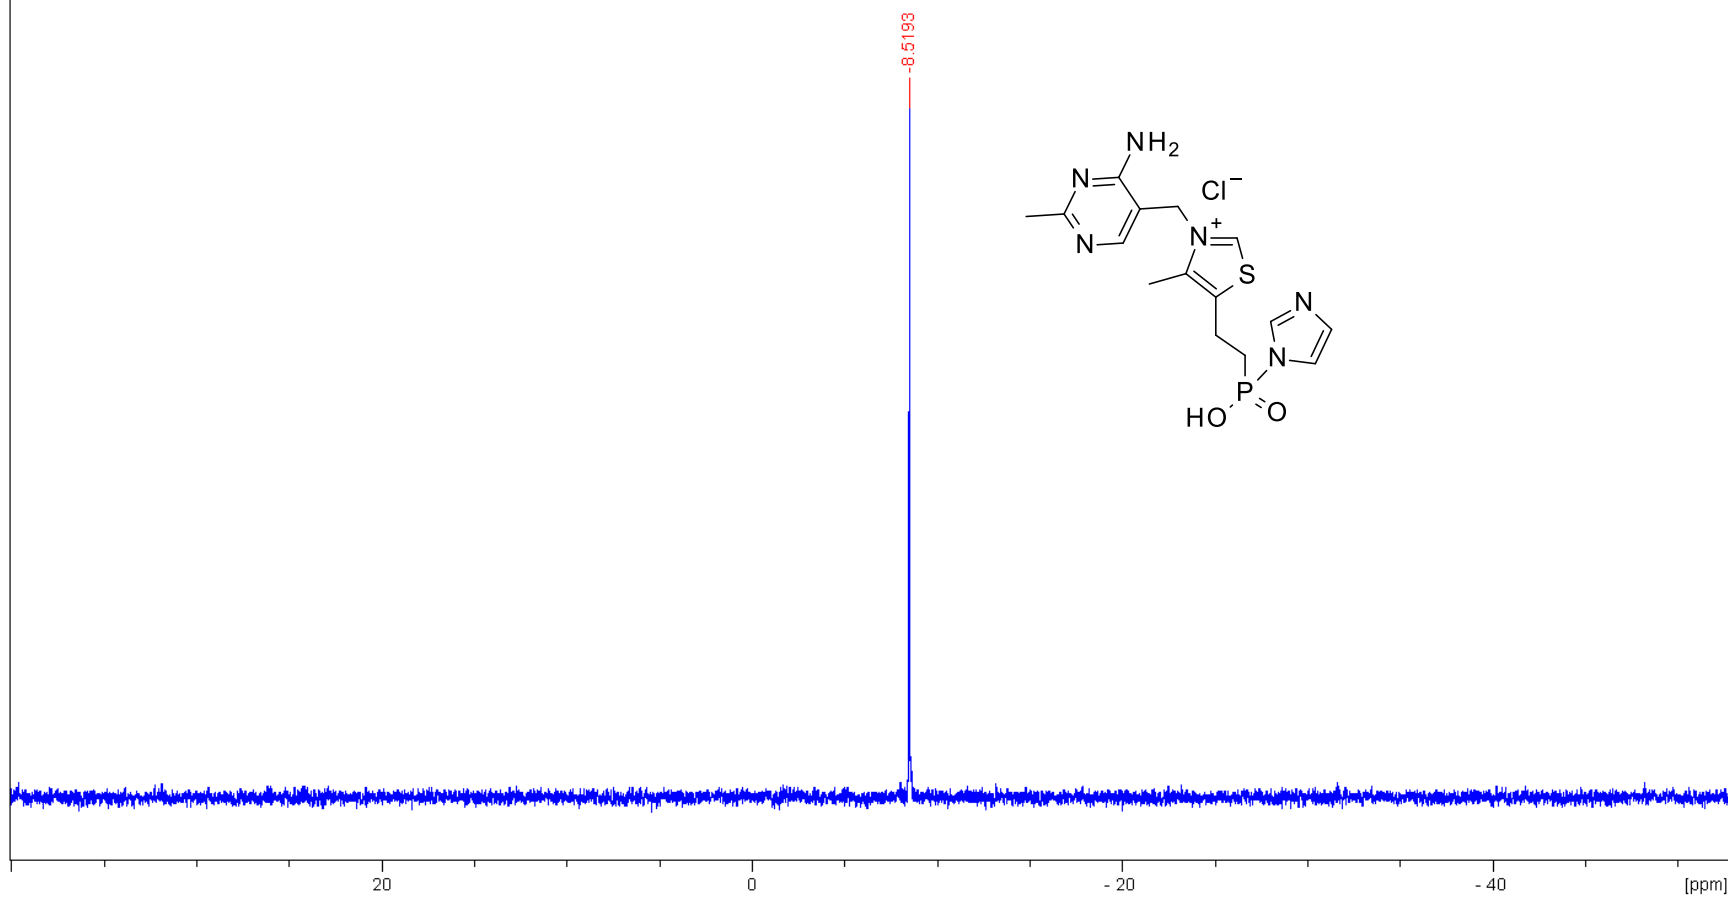

Compound 29. 162 MHz  $^{31}\text{P}$  NMR spectrum in  $\text{D}_2\text{O}$

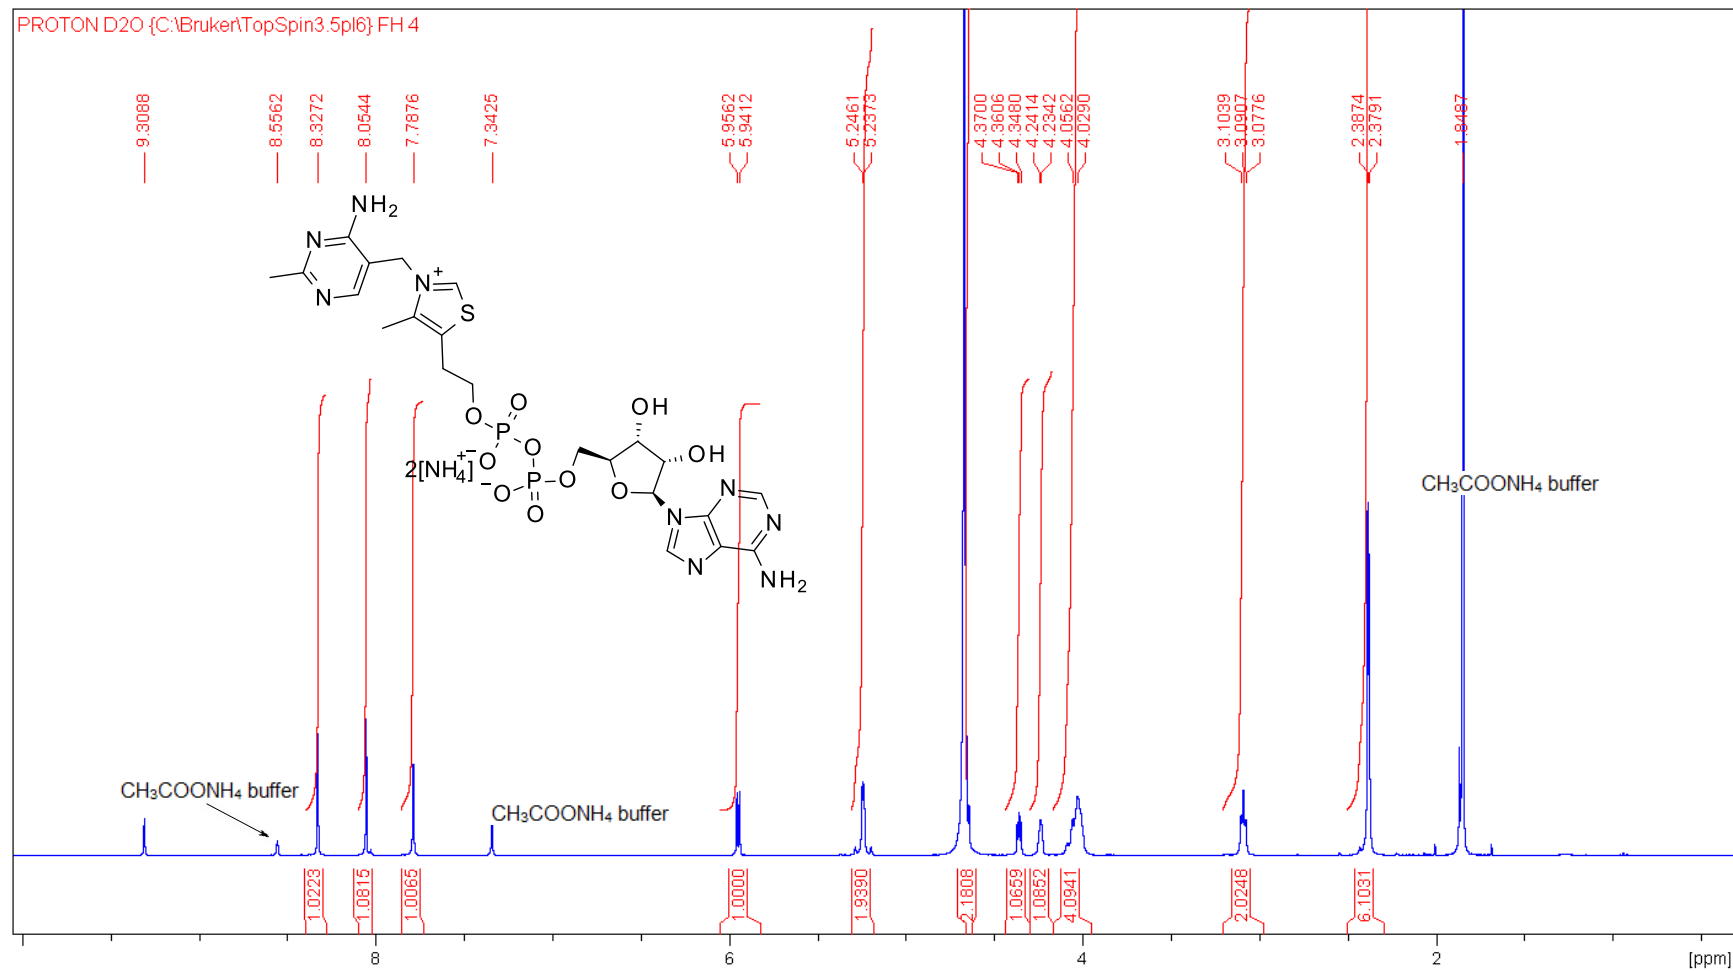

Compound 30a. 400 MHz <sup>1</sup>H NMR spectrum in D<sub>2</sub>O

C13CPD D2O-{C:\Bruker\TopSpin3.5pl6}-FH 4

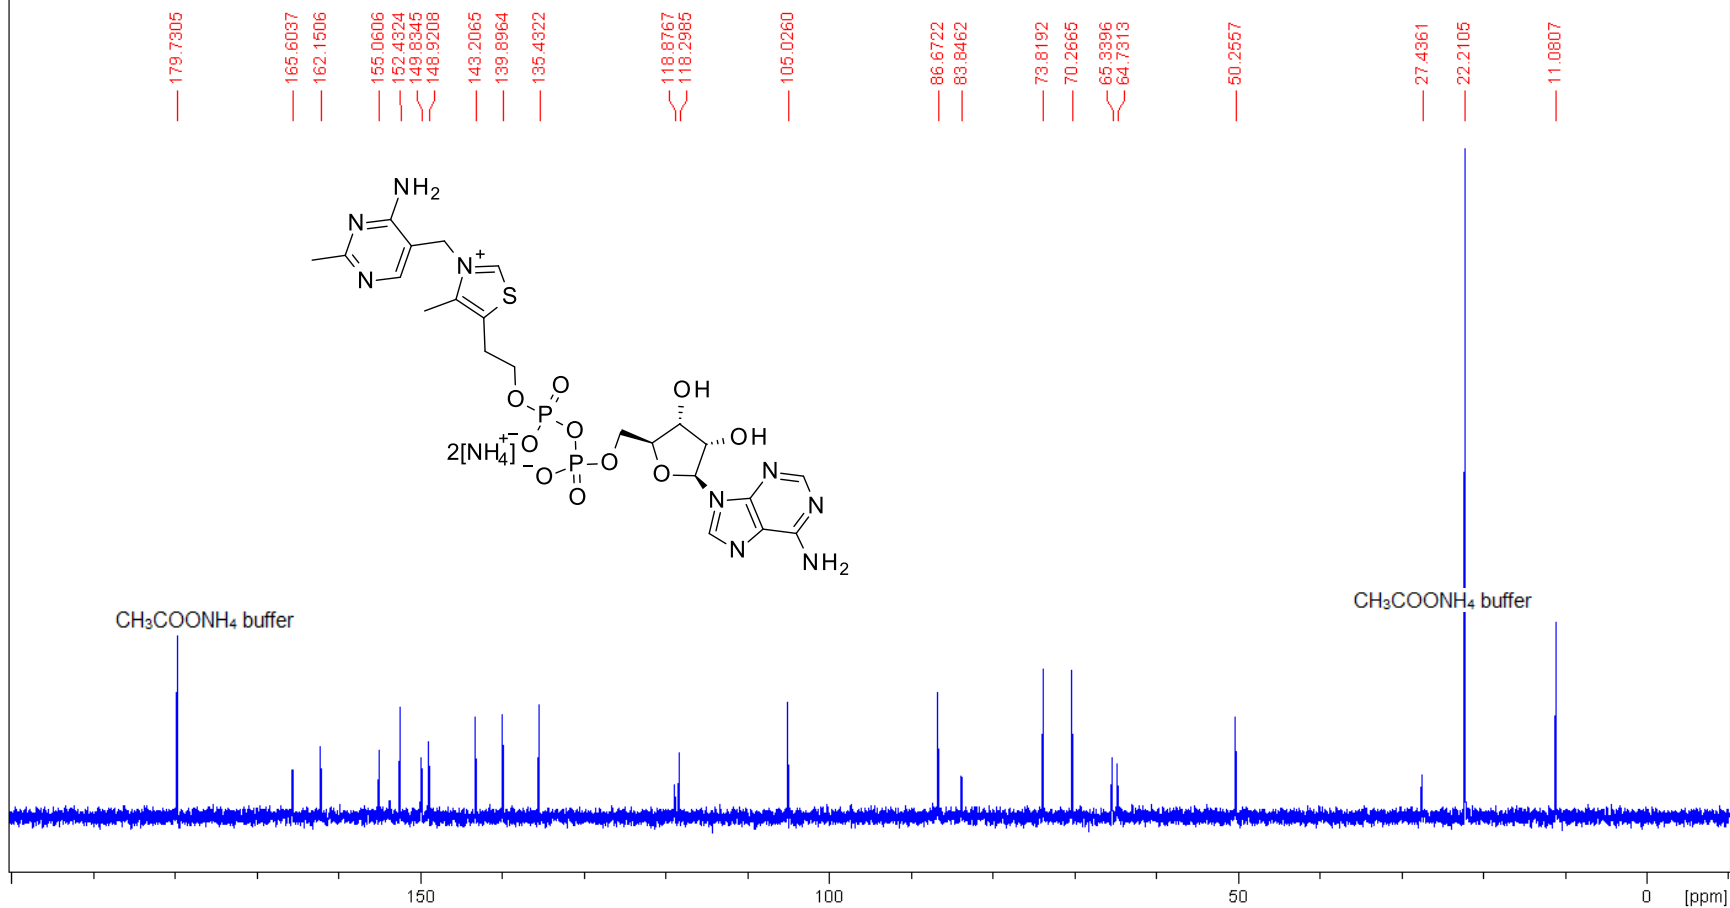

Compound 30a. 100 MHz  $^{13}\text{C}$  NMR spectrum in  $\text{D}_2\text{O}$

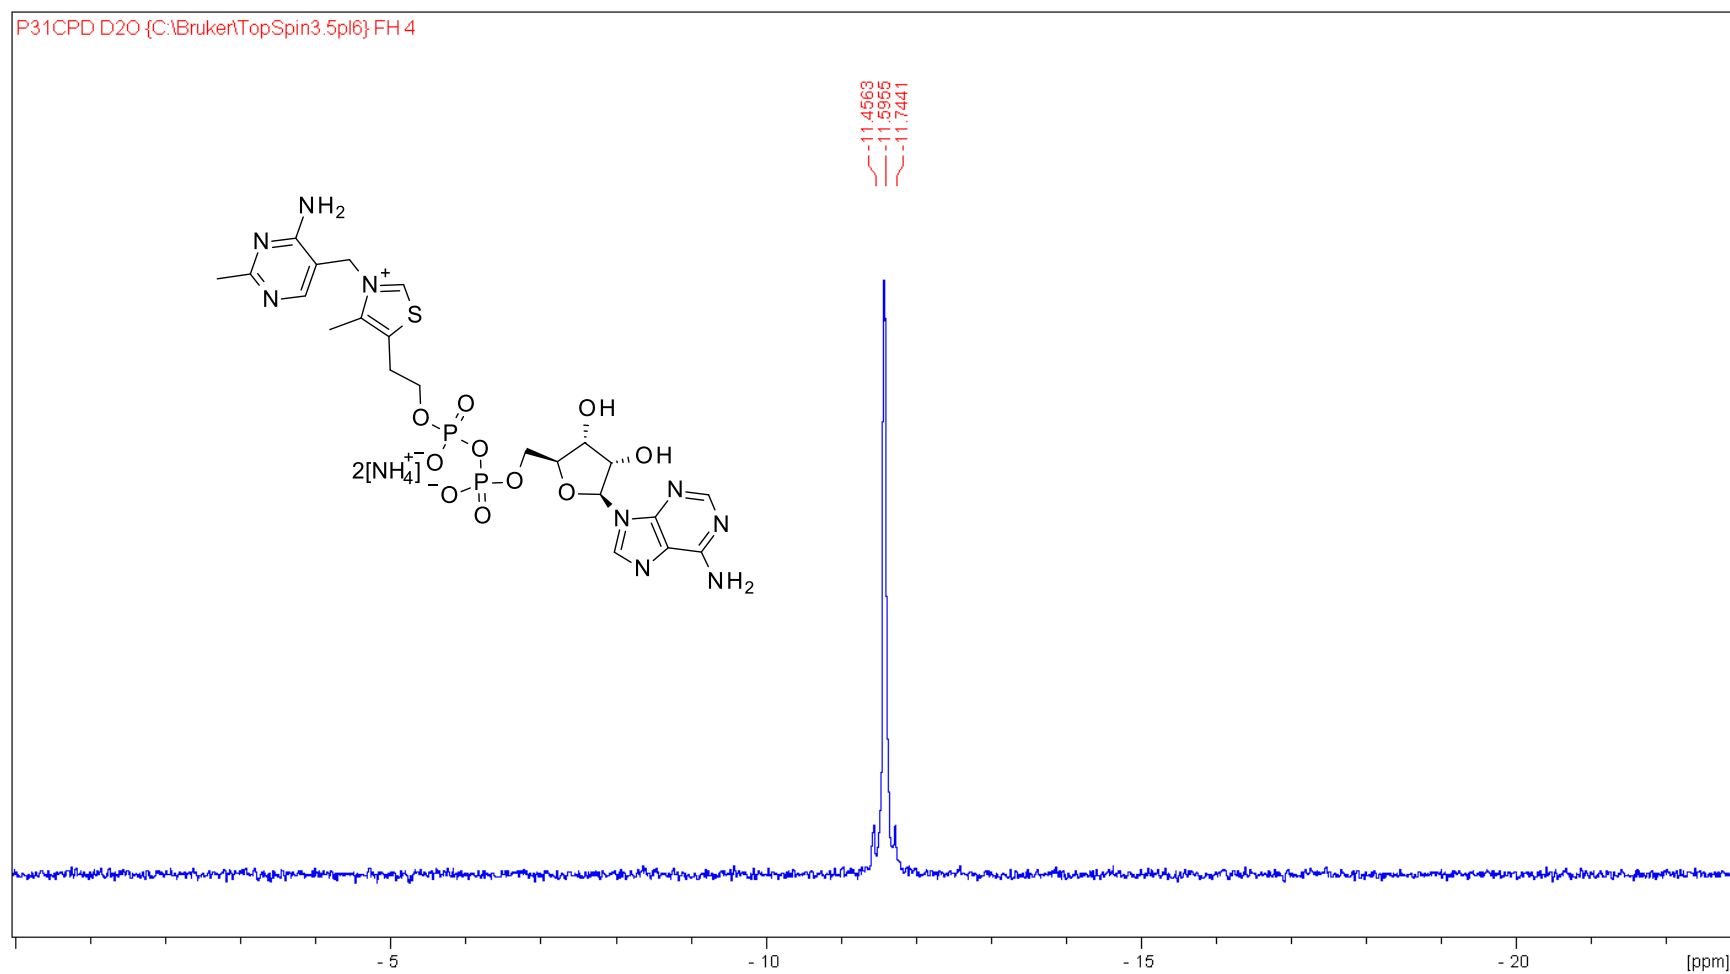

Compound 30a. 162 MHz  $^{31}\text{P}$  NMR spectrum in  $\text{D}_2\text{O}$

mm\_1119121\_4\_thiamine\_adenosine ... #1652 RT: 0.21-0.65 AV: 13 NL: 9.85E6

F: FTMS + p ESI Full ms [50.00-900.0]

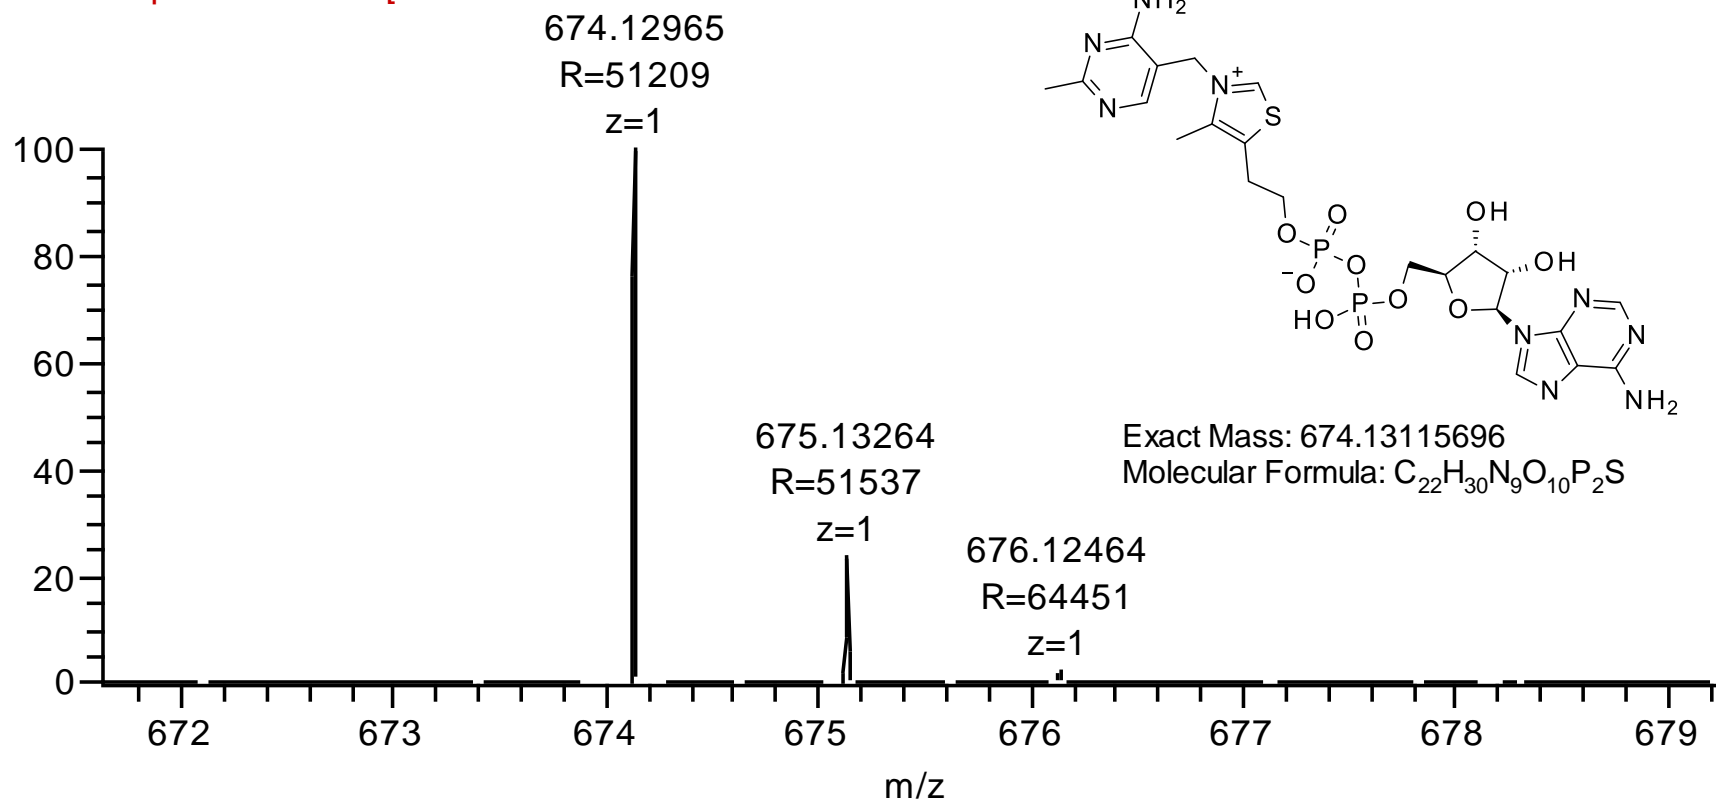

Compound 30a. HRMS spectra

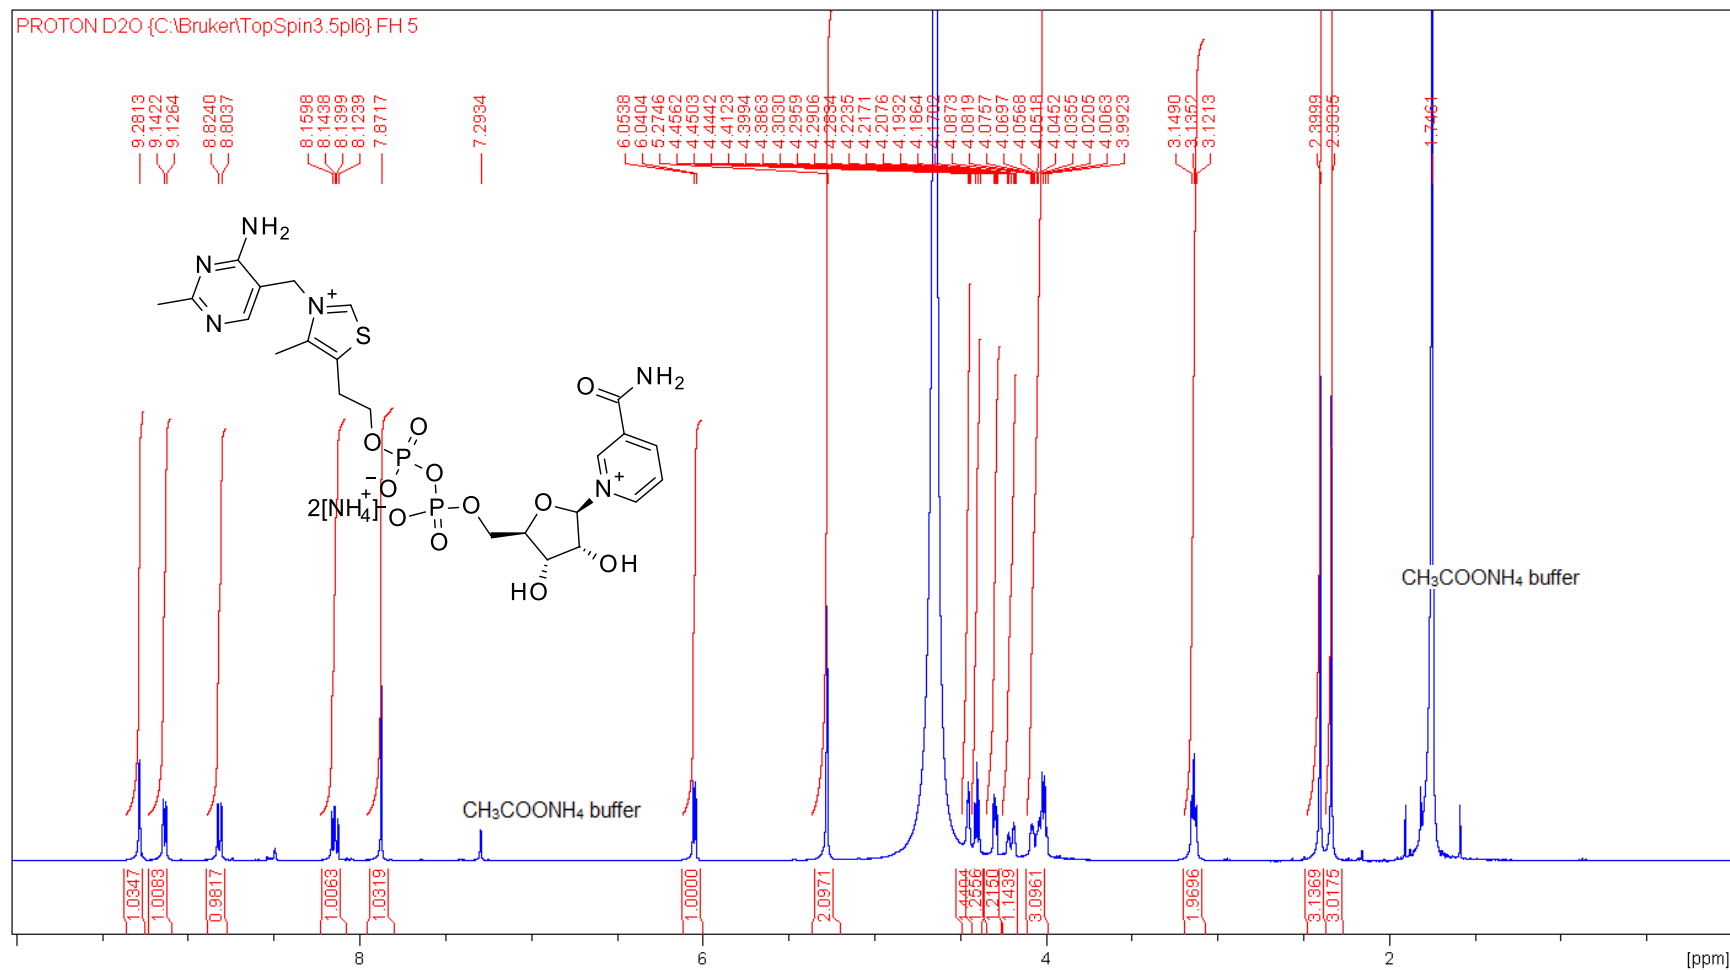

Compound 31. 400 MHz <sup>1</sup>H NMR spectrum in D<sub>2</sub>O

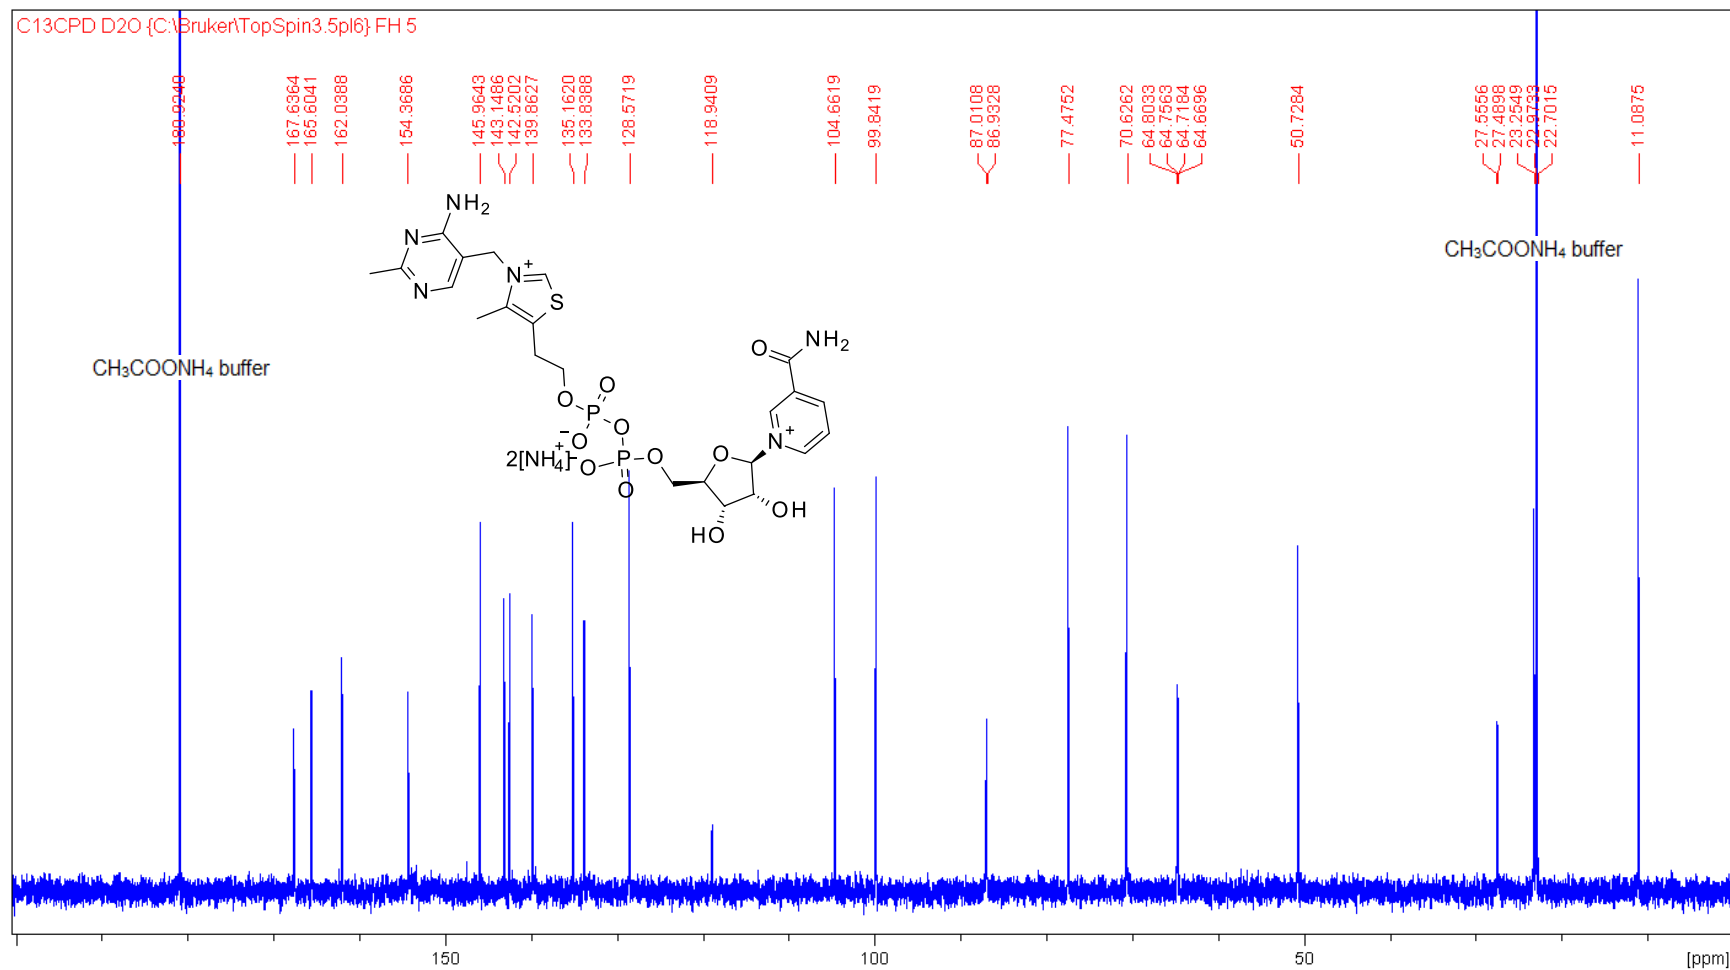

Compound 31. 100 MHz <sup>13</sup>C NMR spectrum in D<sub>2</sub>O



P31CPD D2O {C:\Bruker\TopSpin3.5pl6} FH 5

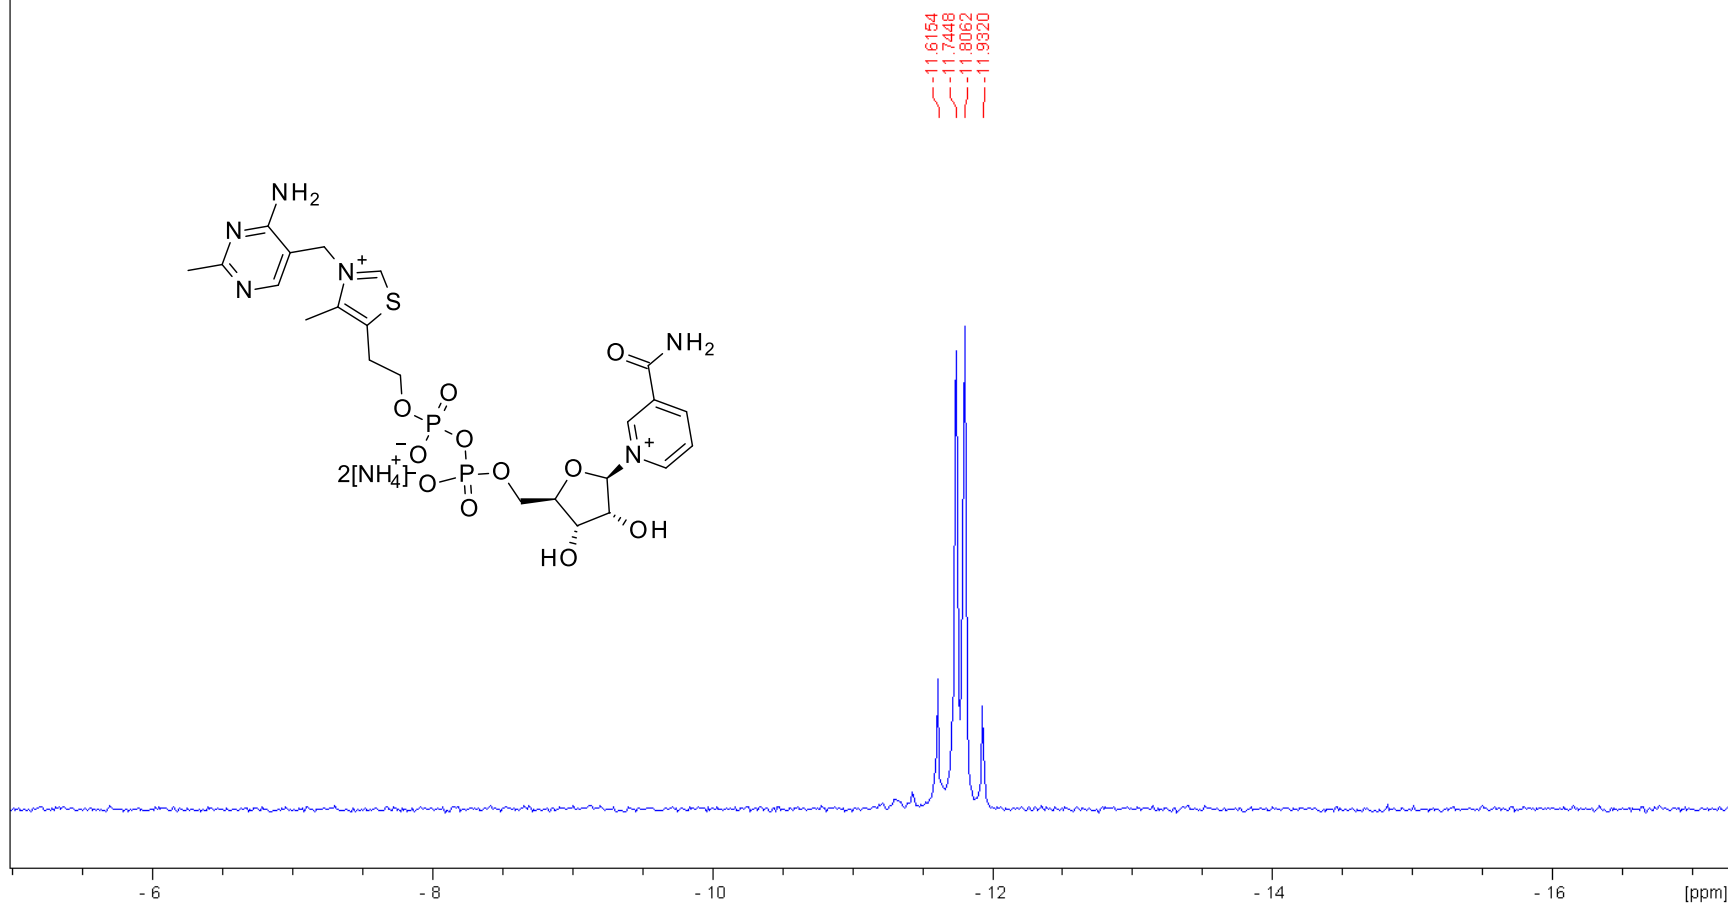

**Compound 31.** 162 MHz  $^{31}\text{P}$  NMR spectrum in  $\text{D}_2\text{O}$

mm\_1119121\_5\_thiamine\_nmn\_pop 02 #19 19 RT: 0.35 0.57 AV: 10 NL: 6.64E6

F: FTMS + p ESI Full ms[50.00-900.0]

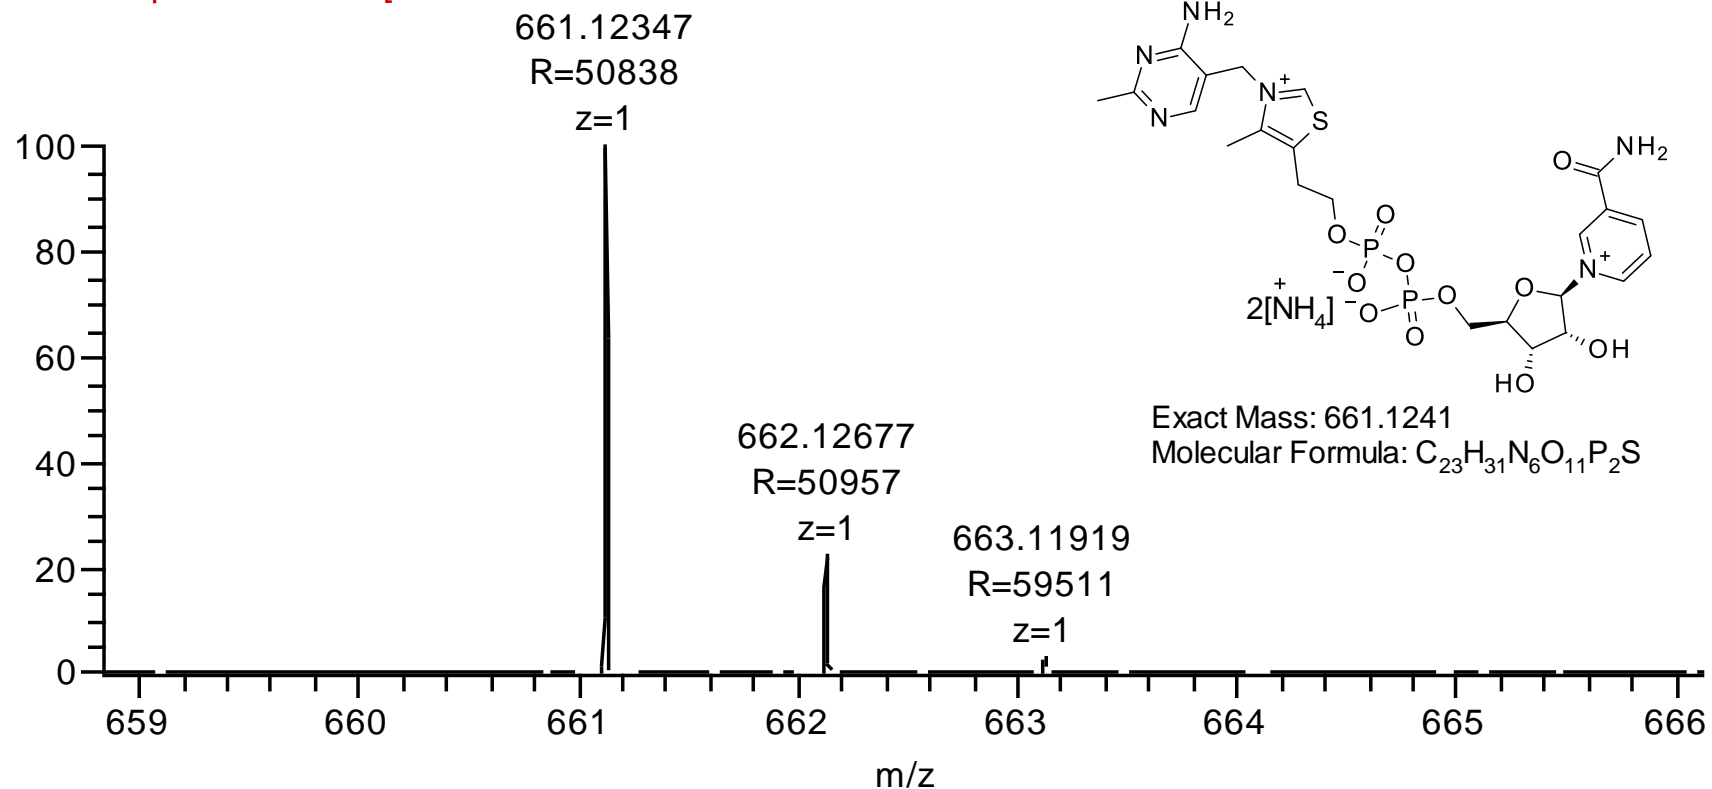

Compound 31. HRMS spectra

P31 DMSO {C:\Bruker\TopSpin3.5pl6} FH 2

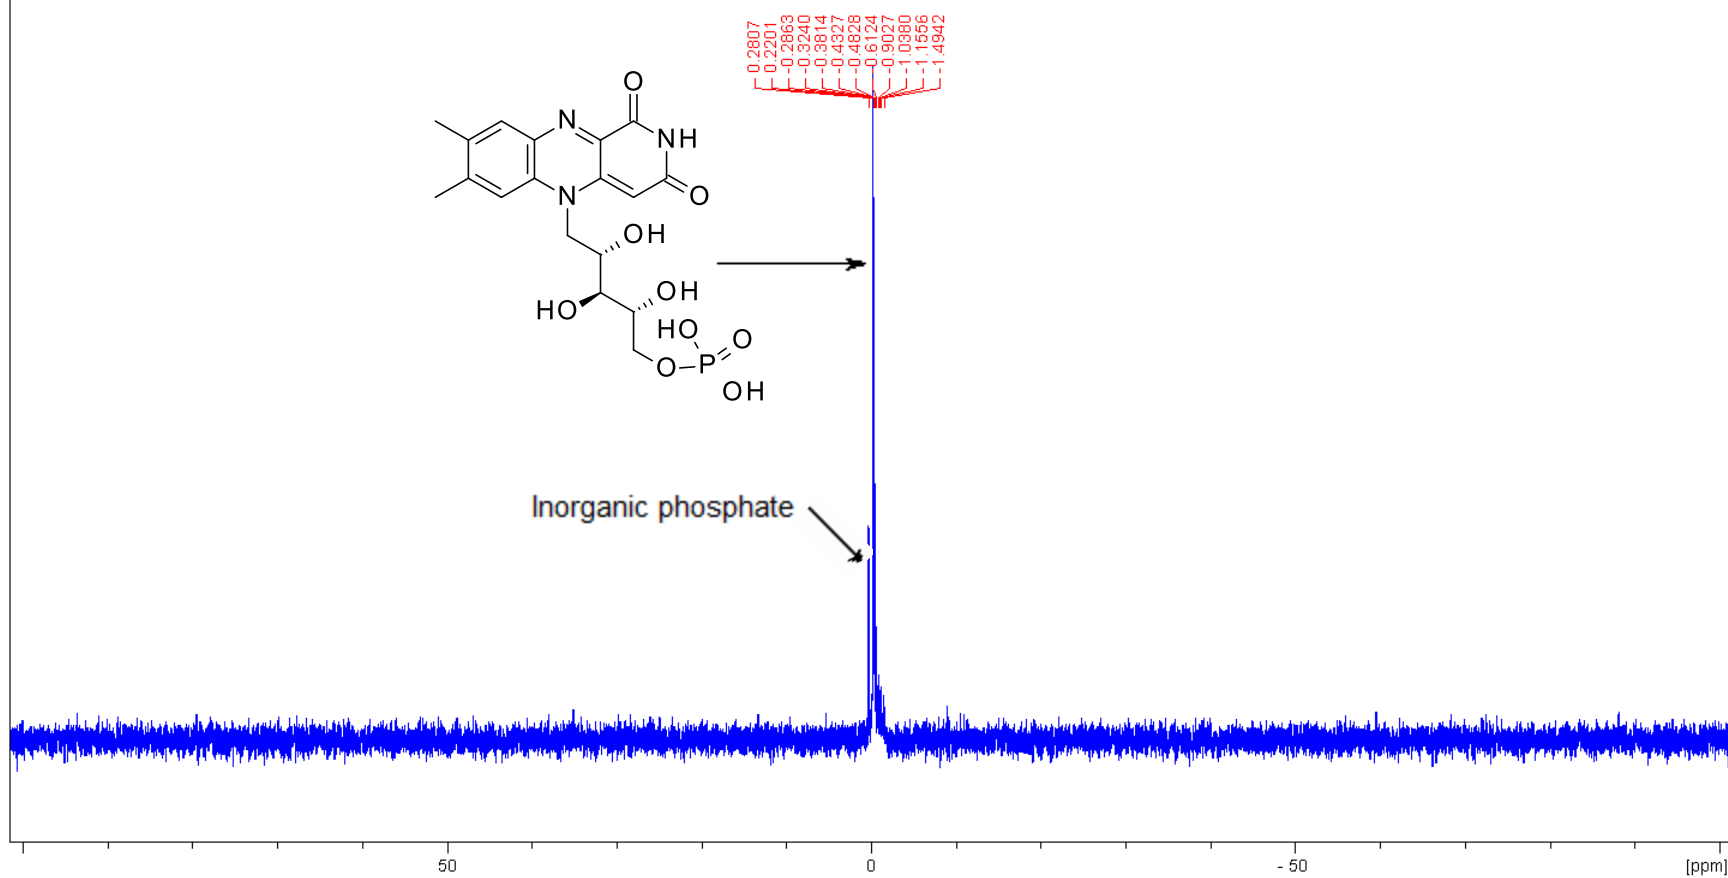

Compound 32. 162 MHz  $^{31}\text{P}$  NMR spectrum in  $\text{D}_2\text{O}$

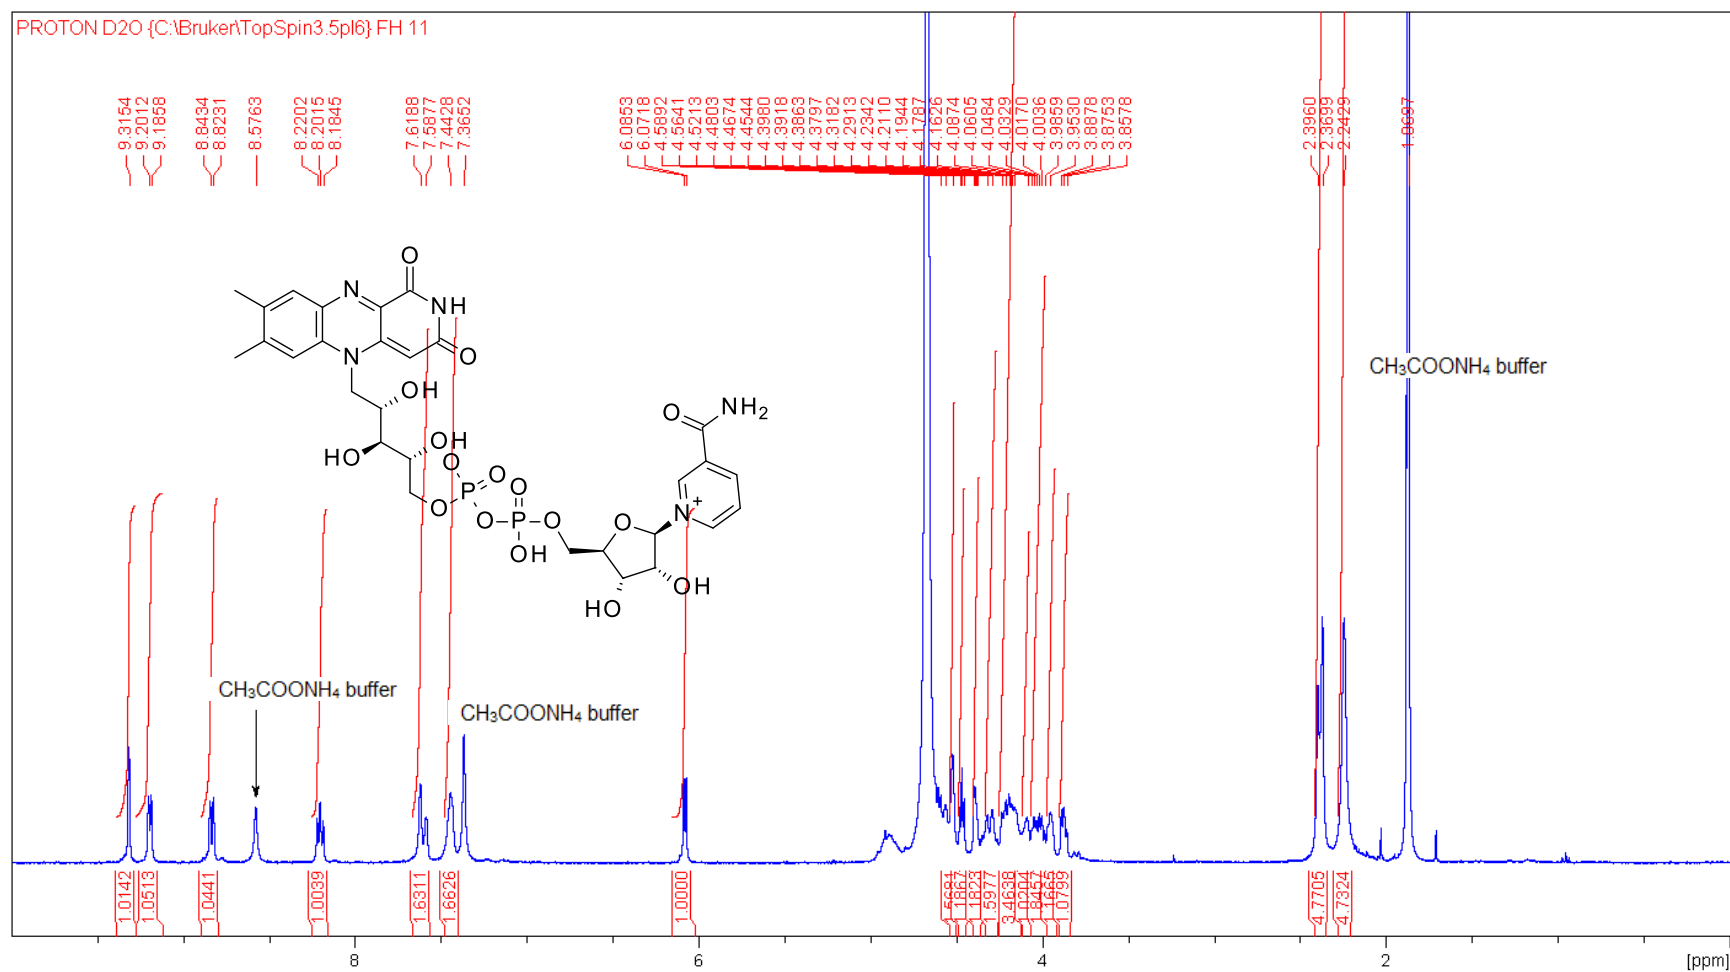

Compound33. 400 MHz <sup>1</sup>H NMR spectrum in D<sub>2</sub>O

C13CPD D2O {C:\Bruker\TopSpin3.5pl6} FH 11

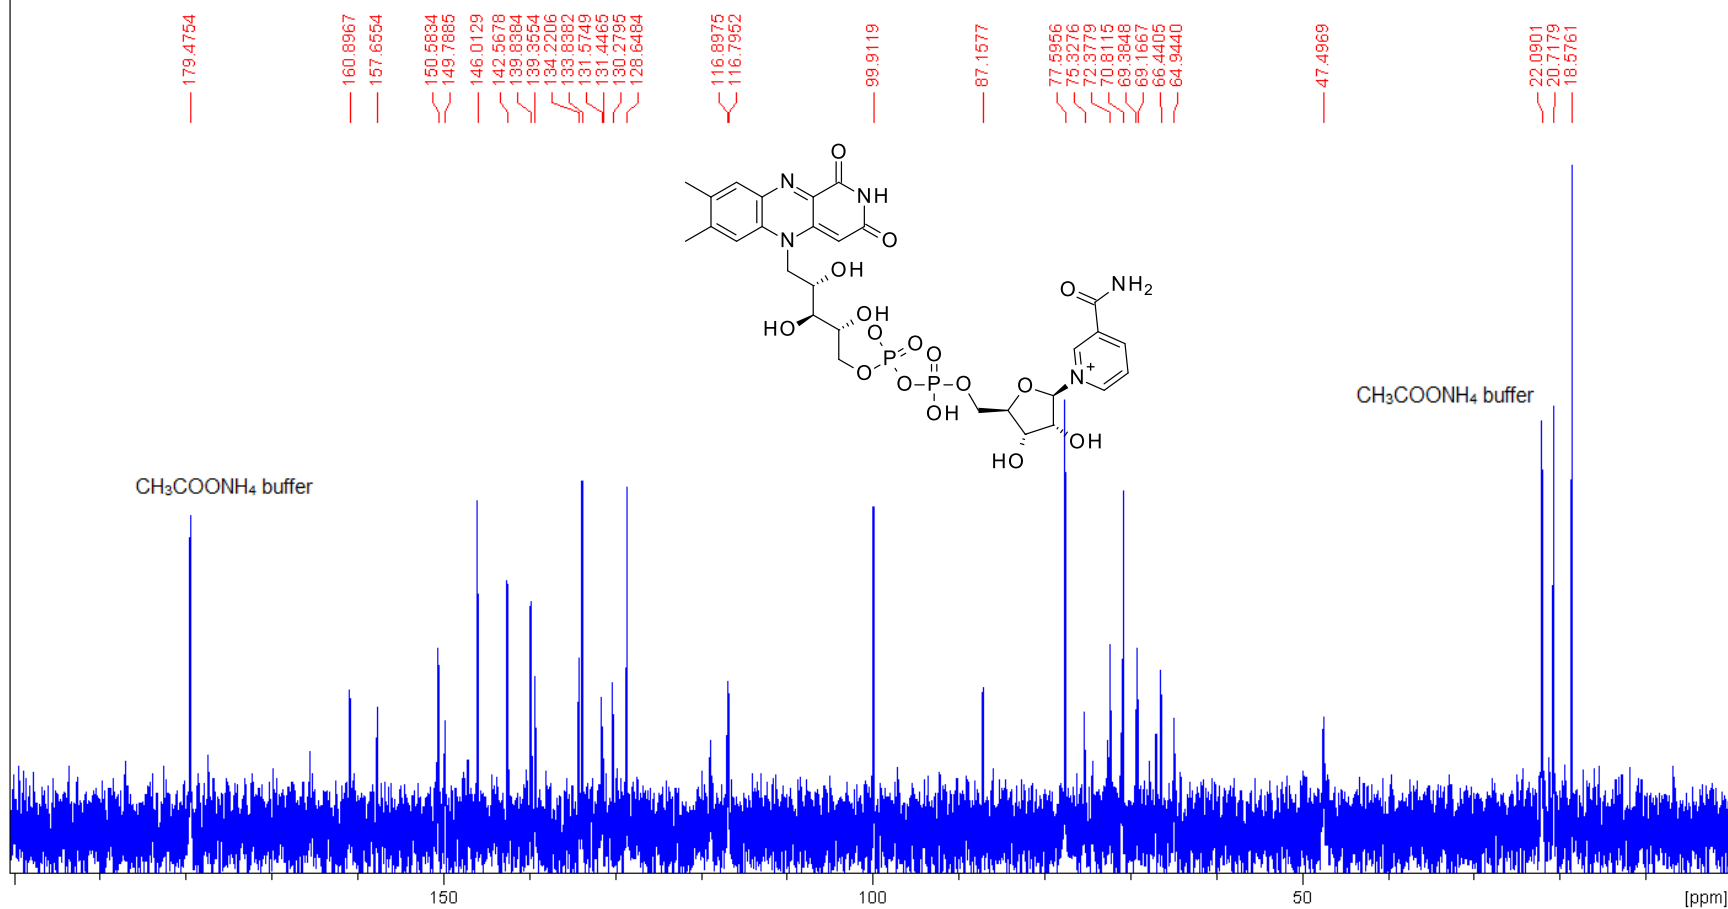

Compound 33. 100 MHz  $^{13}\text{C}$  NMR spectrum in  $\text{D}_2\text{O}$

P31CPD D2O {C:\Bruker\TopSpin3.5pl6} FH 2

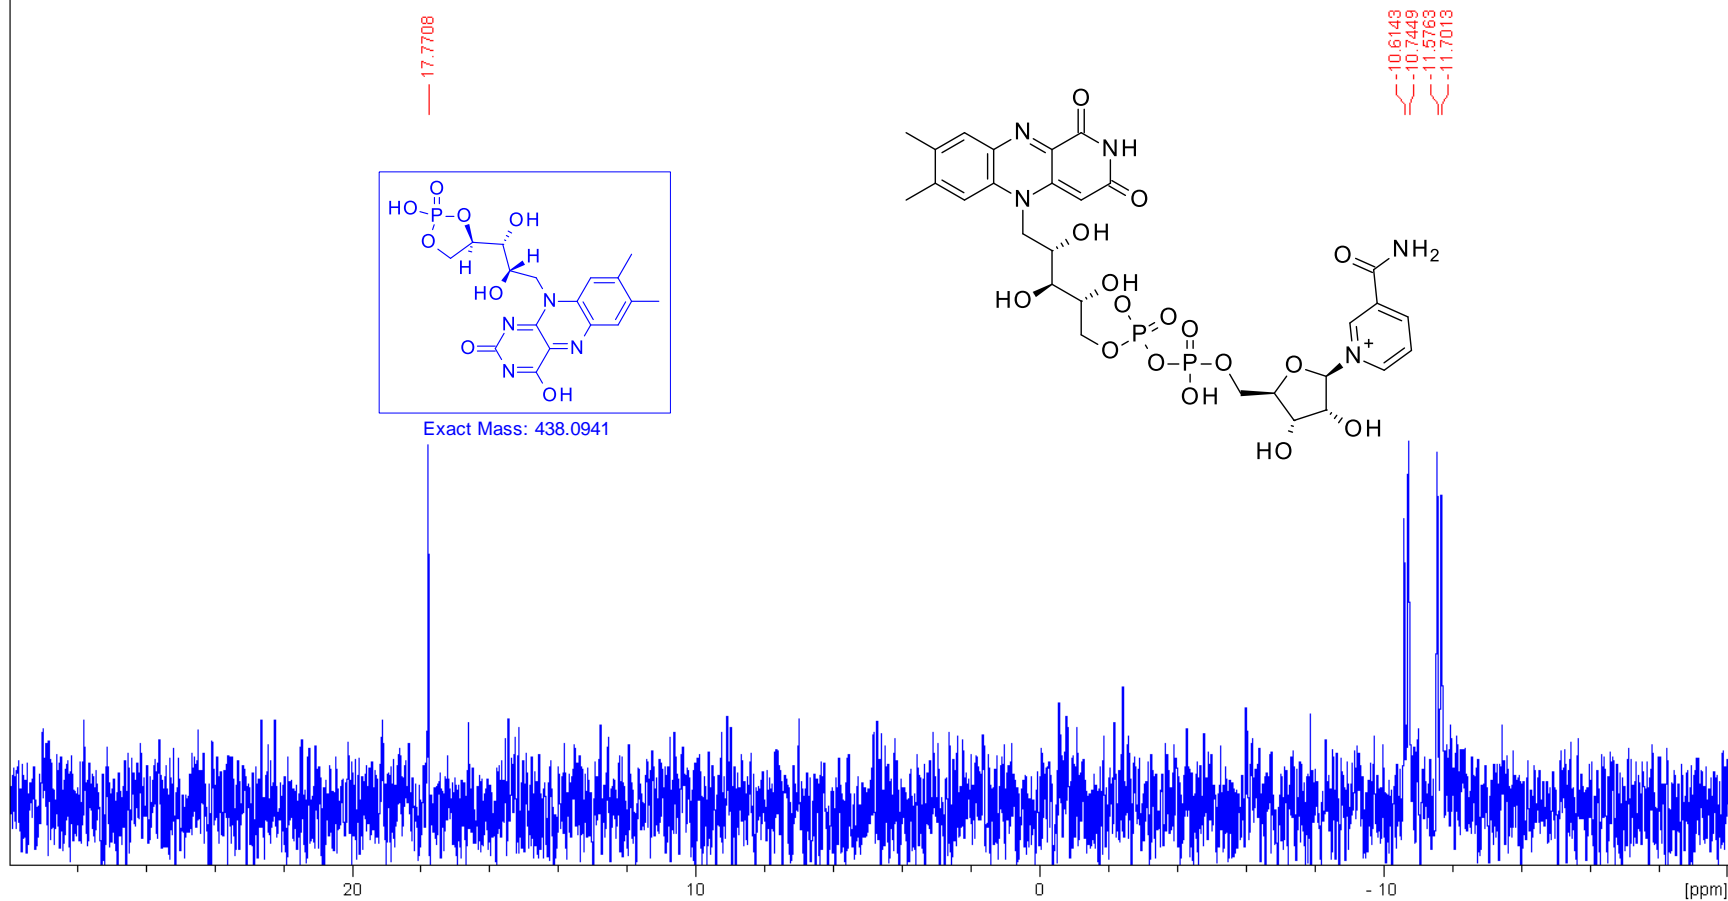

Compound 33. 162 MHz  $^{31}\text{P}$  NMR spectrum in  $\text{D}_2\text{O}$

mm\_092720\_fh\_04\_53\_1000mass\_02 #1-33 RT: 0.00-0.28 AV: 33 NL: 3.20E5  
T: {0,0} + p ESI !corona sid=75.00 det=9

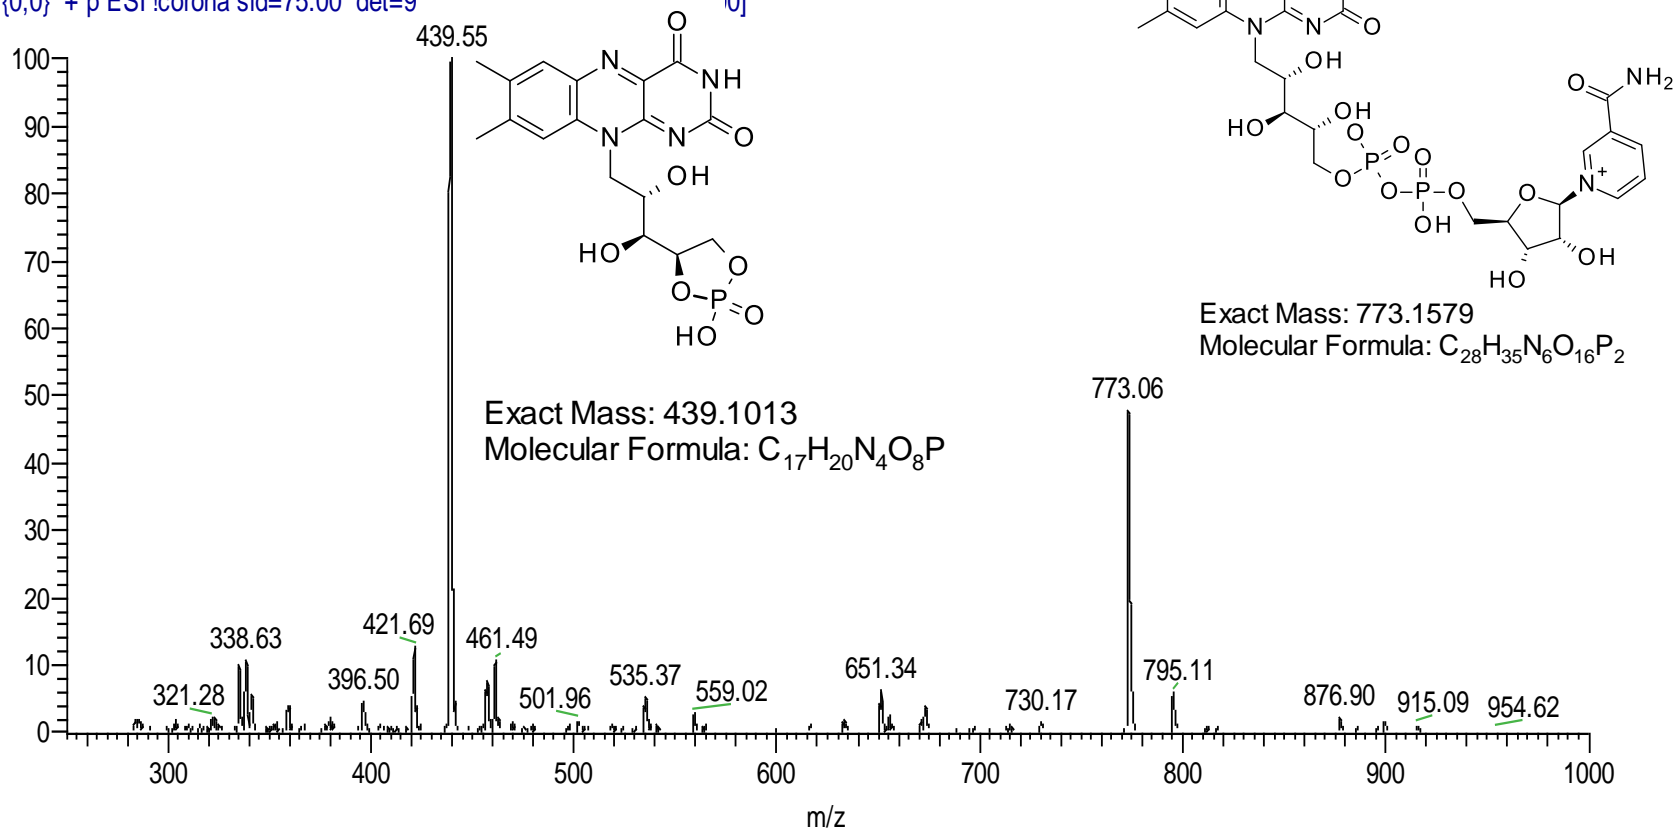

**Compound 33&34.** ESI-MS spectra

mm\_1119121\_6\_riboflavin\_nmn\_pop 02 #00 40 RT: 0.42 0.63 AV: 7 NL: 4.93E5

F: FTMS + p ESI Full ms [50.00-900.0]

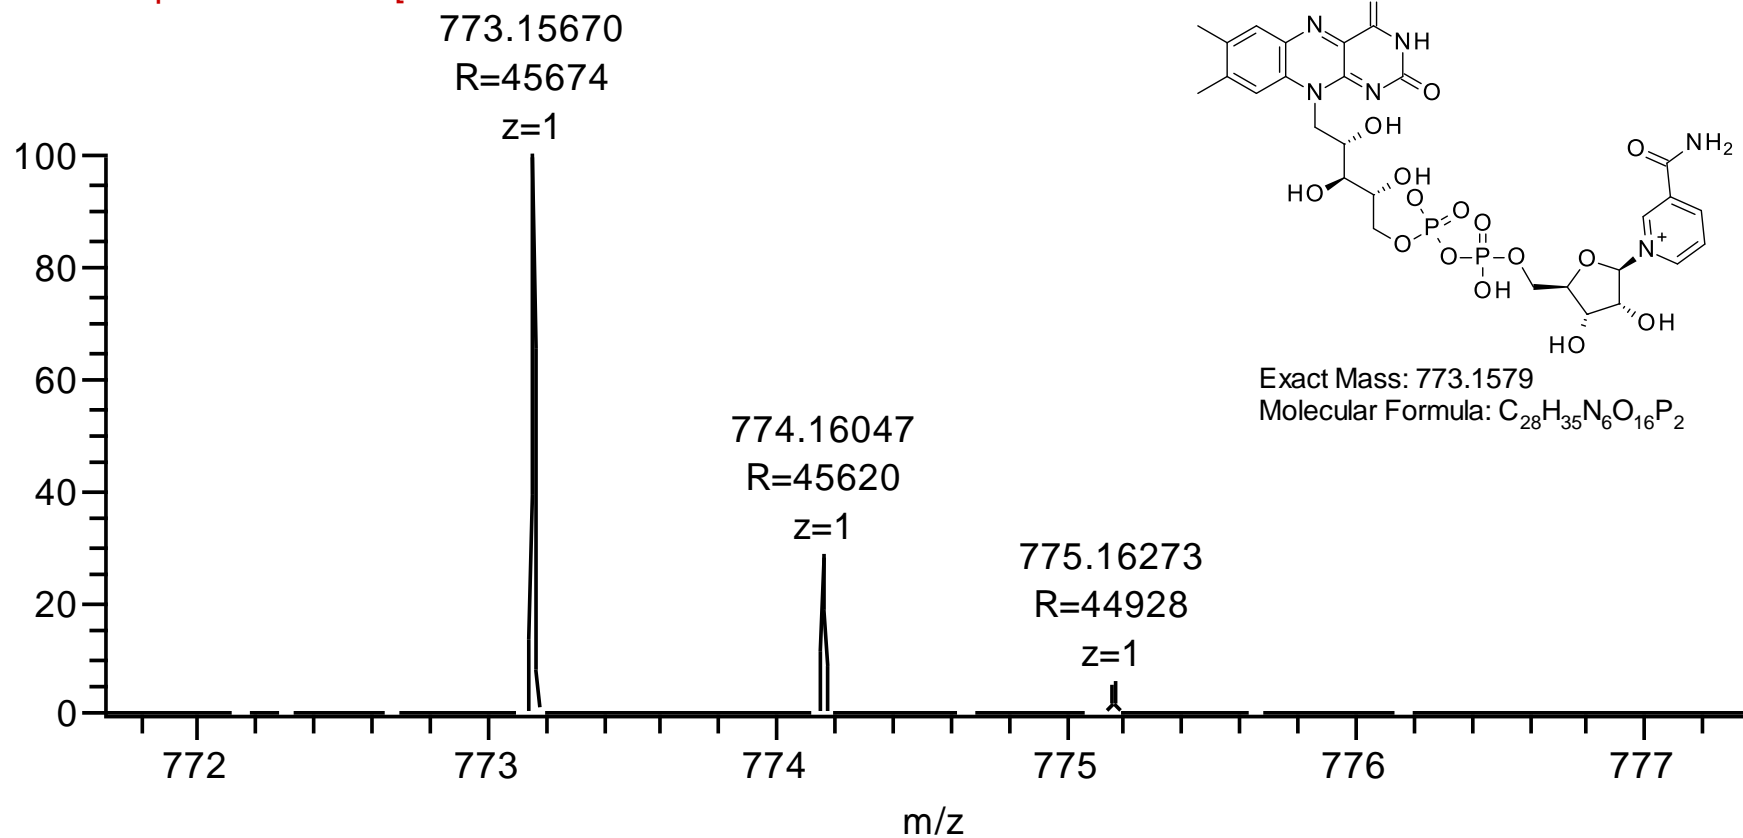

Compound 33. HRMS spectra



"LB\_20211126\_cFMN from FMN\_D2O-TMP\_full characterization" 1 1 C:\Bruker\TopSpin3.5pl6\data\LB\nmr  
 PROTON D2O {C:\Bruker\TopSpin3.5pl6} LB 5

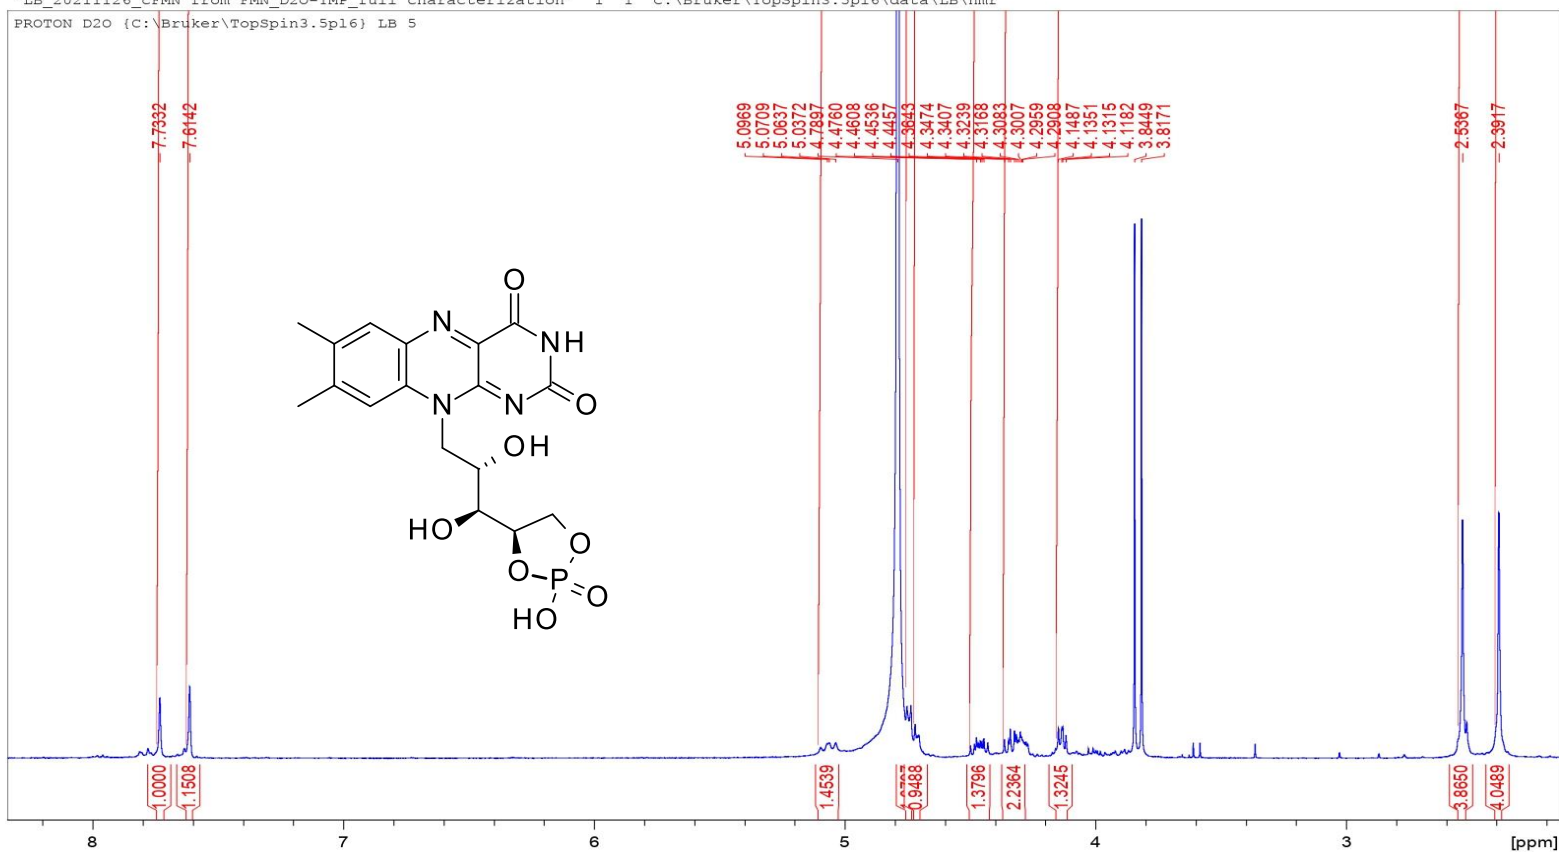

**Compound 34.** 400 MHz  $^1\text{H}$  NMR spectrum in  $\text{D}_2\text{O}$

"LB\_20211126\_cFMN from FMN\_D2O-TMP\_full characterization" 3 1 C:\Bruker\TopSpin3.5pl6\data\LB\nmr  
 C13CPD D2O {C:\Bruker\TopSpin3.5pl6} LB 5

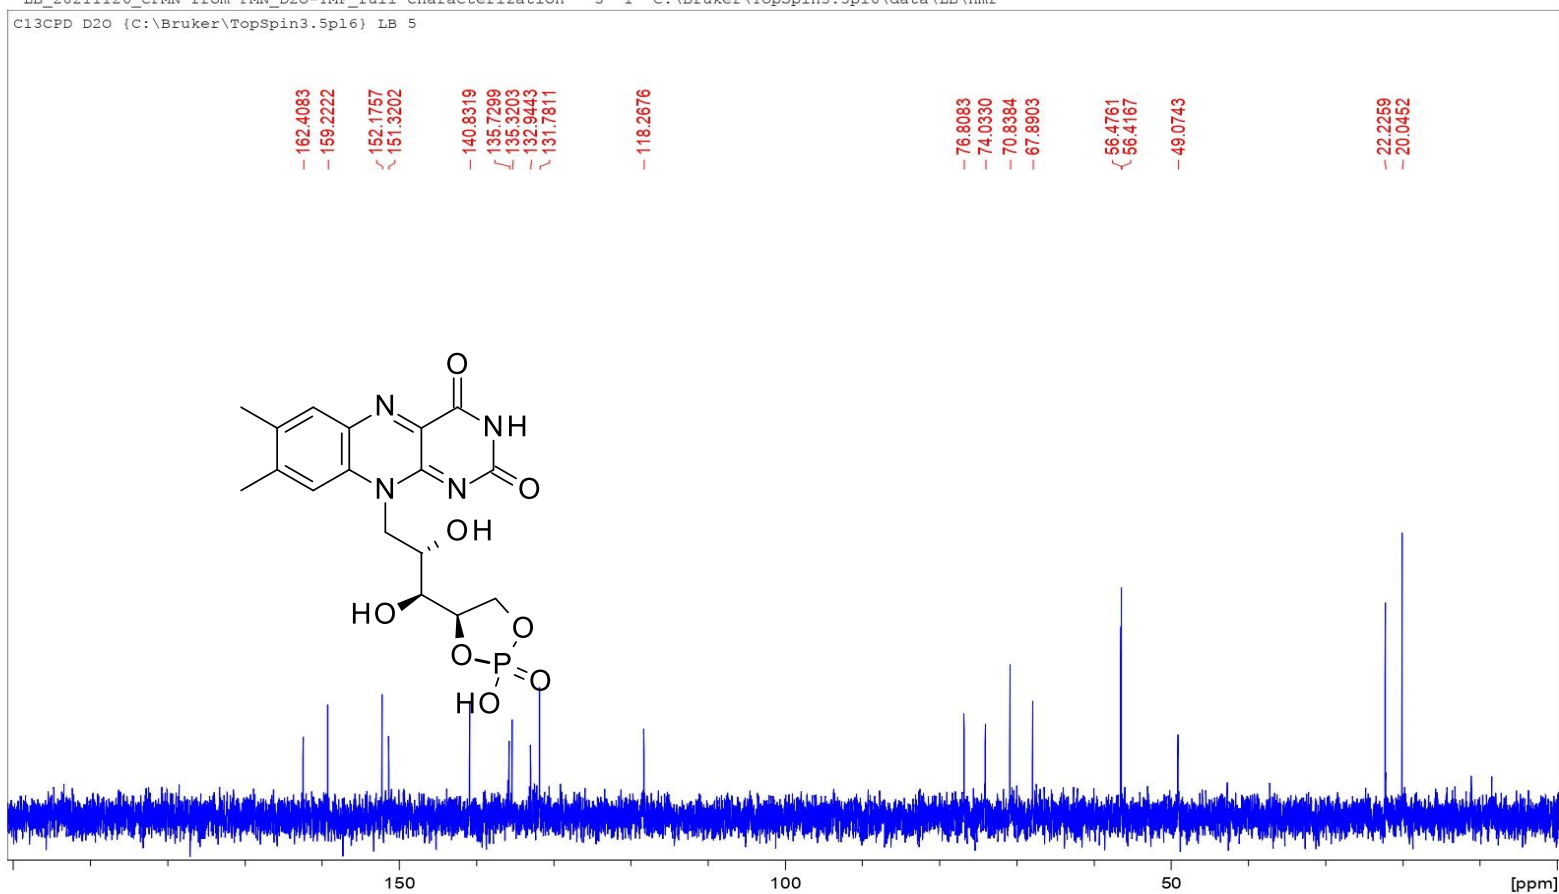

Compound 34. 100 MHz  $^{13}\text{C}$  NMR spectrum in  $\text{D}_2\text{O}$

"LB\_20211126\_cFMN from FMN\_D2O-TMP\_full characterization" 2 1 C:\Bruker\TopSpin3.5pl6\data\LB\nmr  
P31CPD D2O {C:\Bruker\TopSpin3.5pl6} LB 5

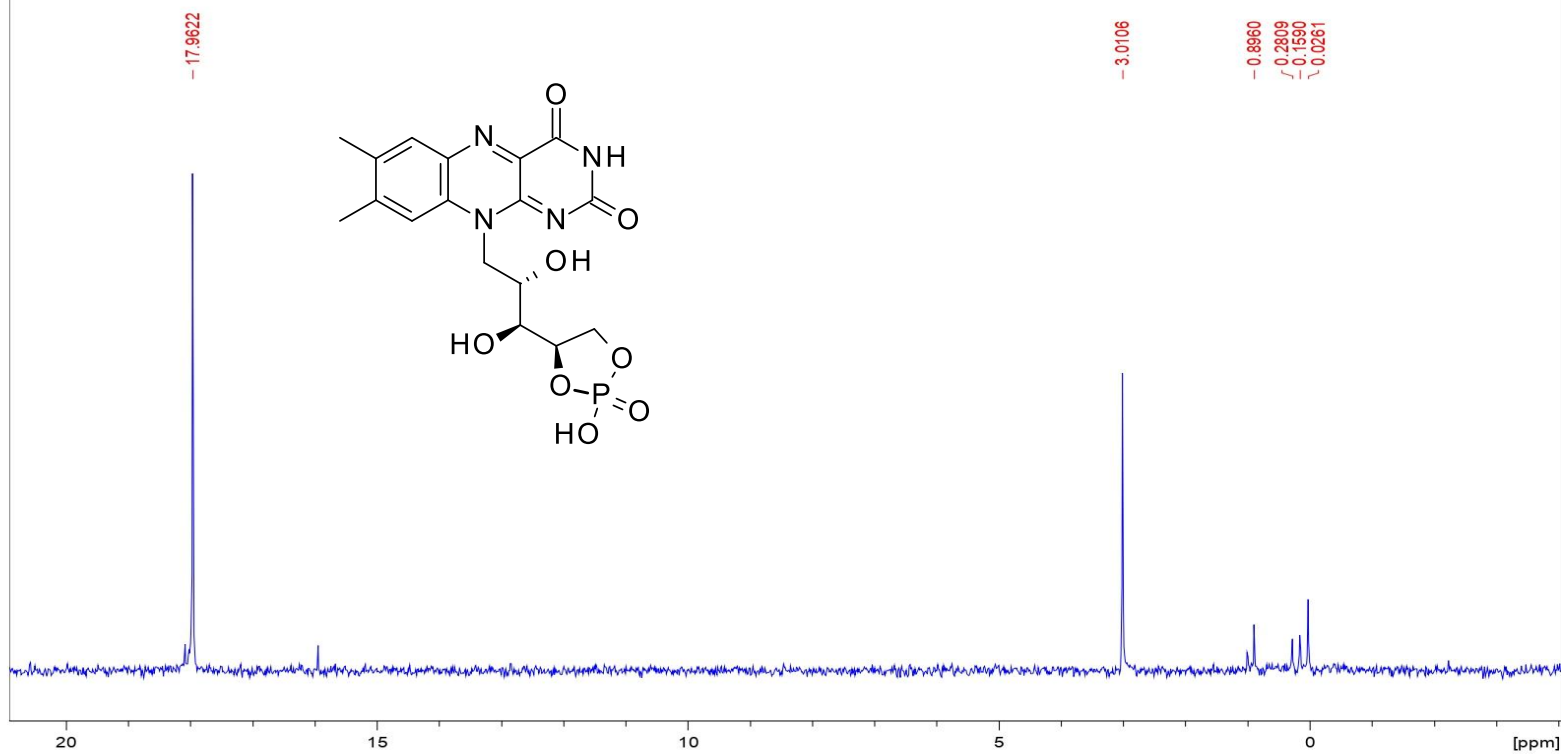

**Compound 34.** 162 MHz  $^{31}\text{P}$  NMR spectrum in  $\text{D}_2\text{O}$

mm\_112221\_riboflavin\_nmn\_pop #244 227 RT: 2.58202 ^V: 27 NL: 1.53E4

F: FTMS + p ESI Full ms2 773.16@

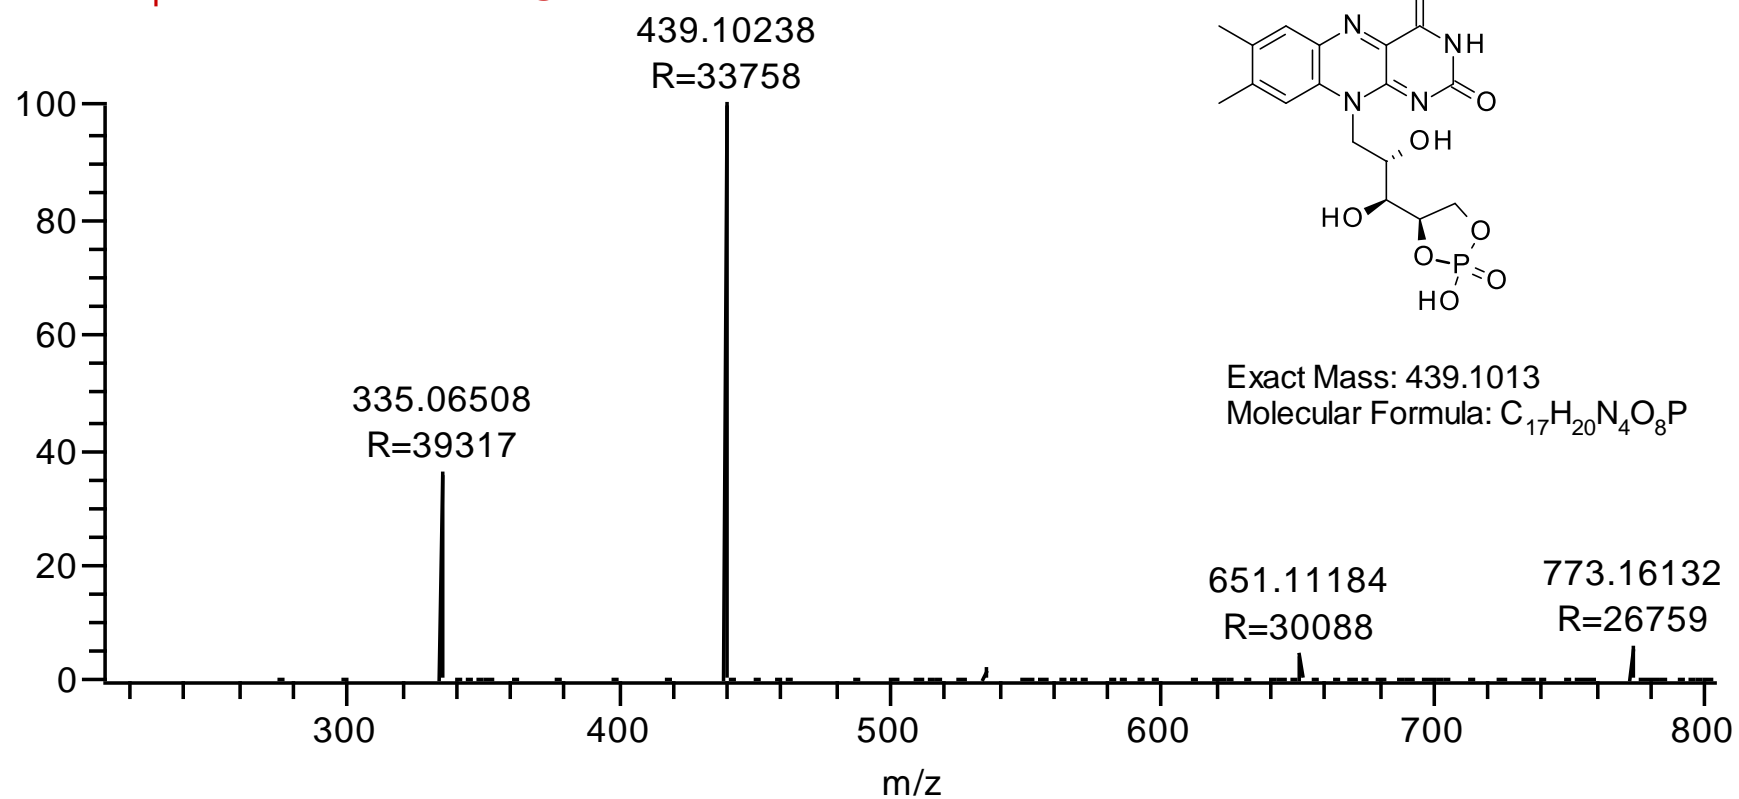

Compound 34. HRMS spectra



C13CPD D2O {C:\Bruker\TopSpin3.5pl6} FH 24

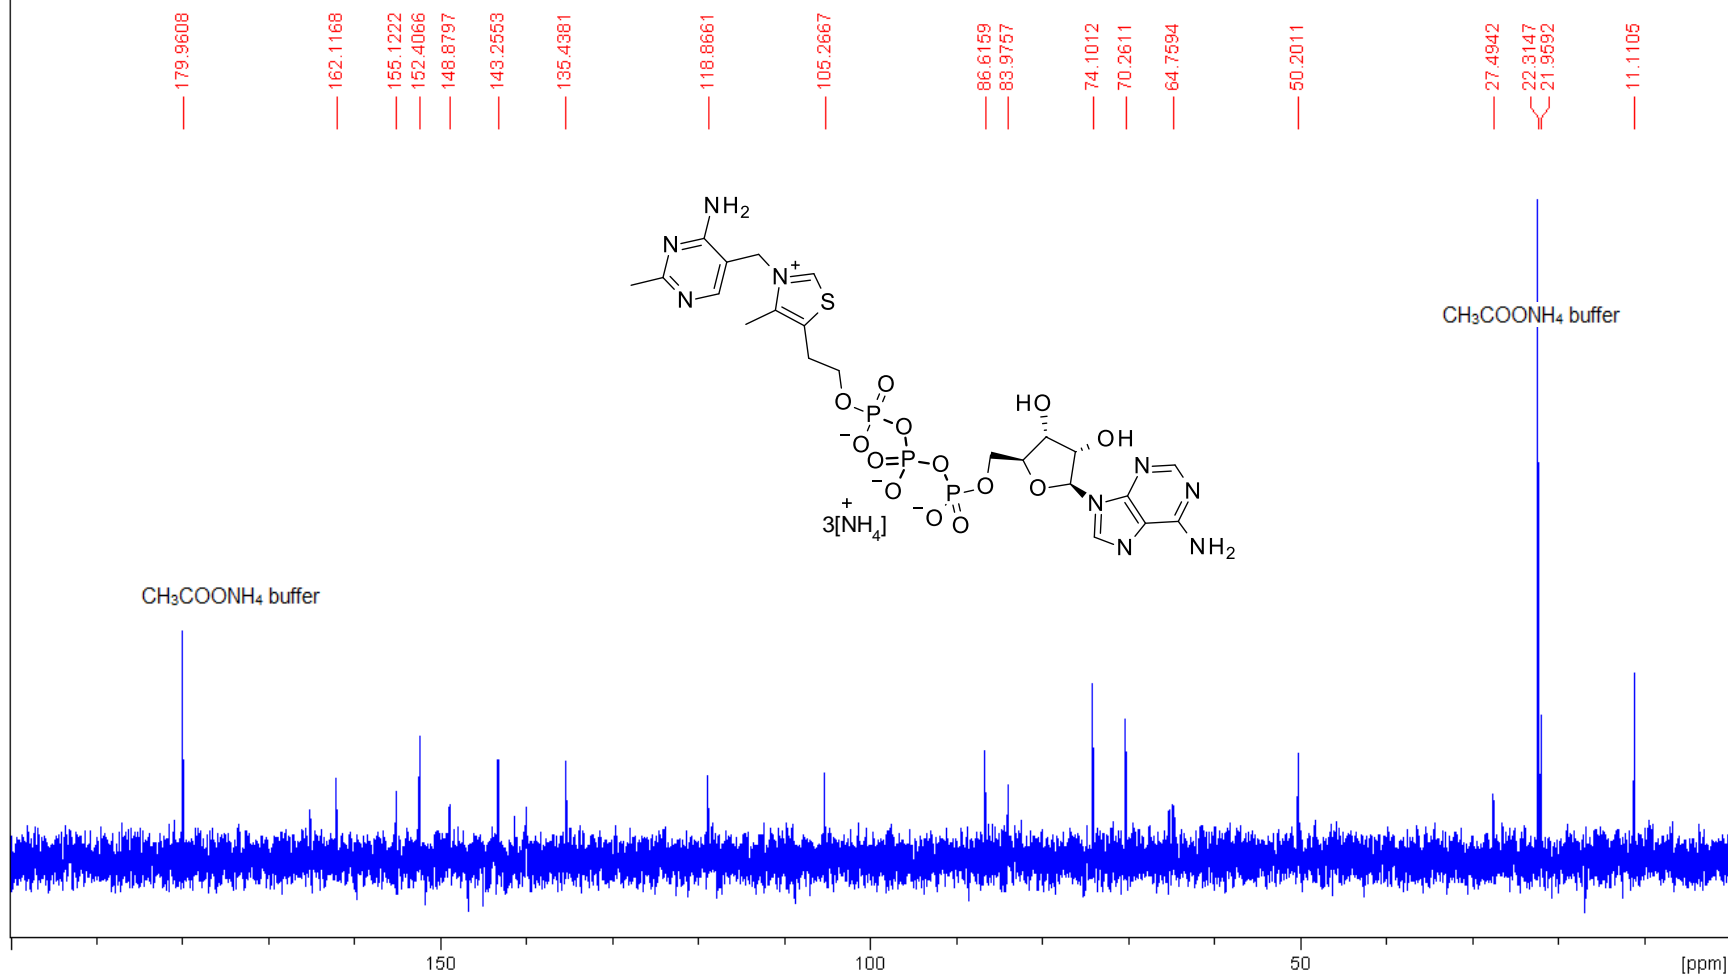

Compound 37. 100 MHz <sup>13</sup>C NMR spectrum in D<sub>2</sub>O

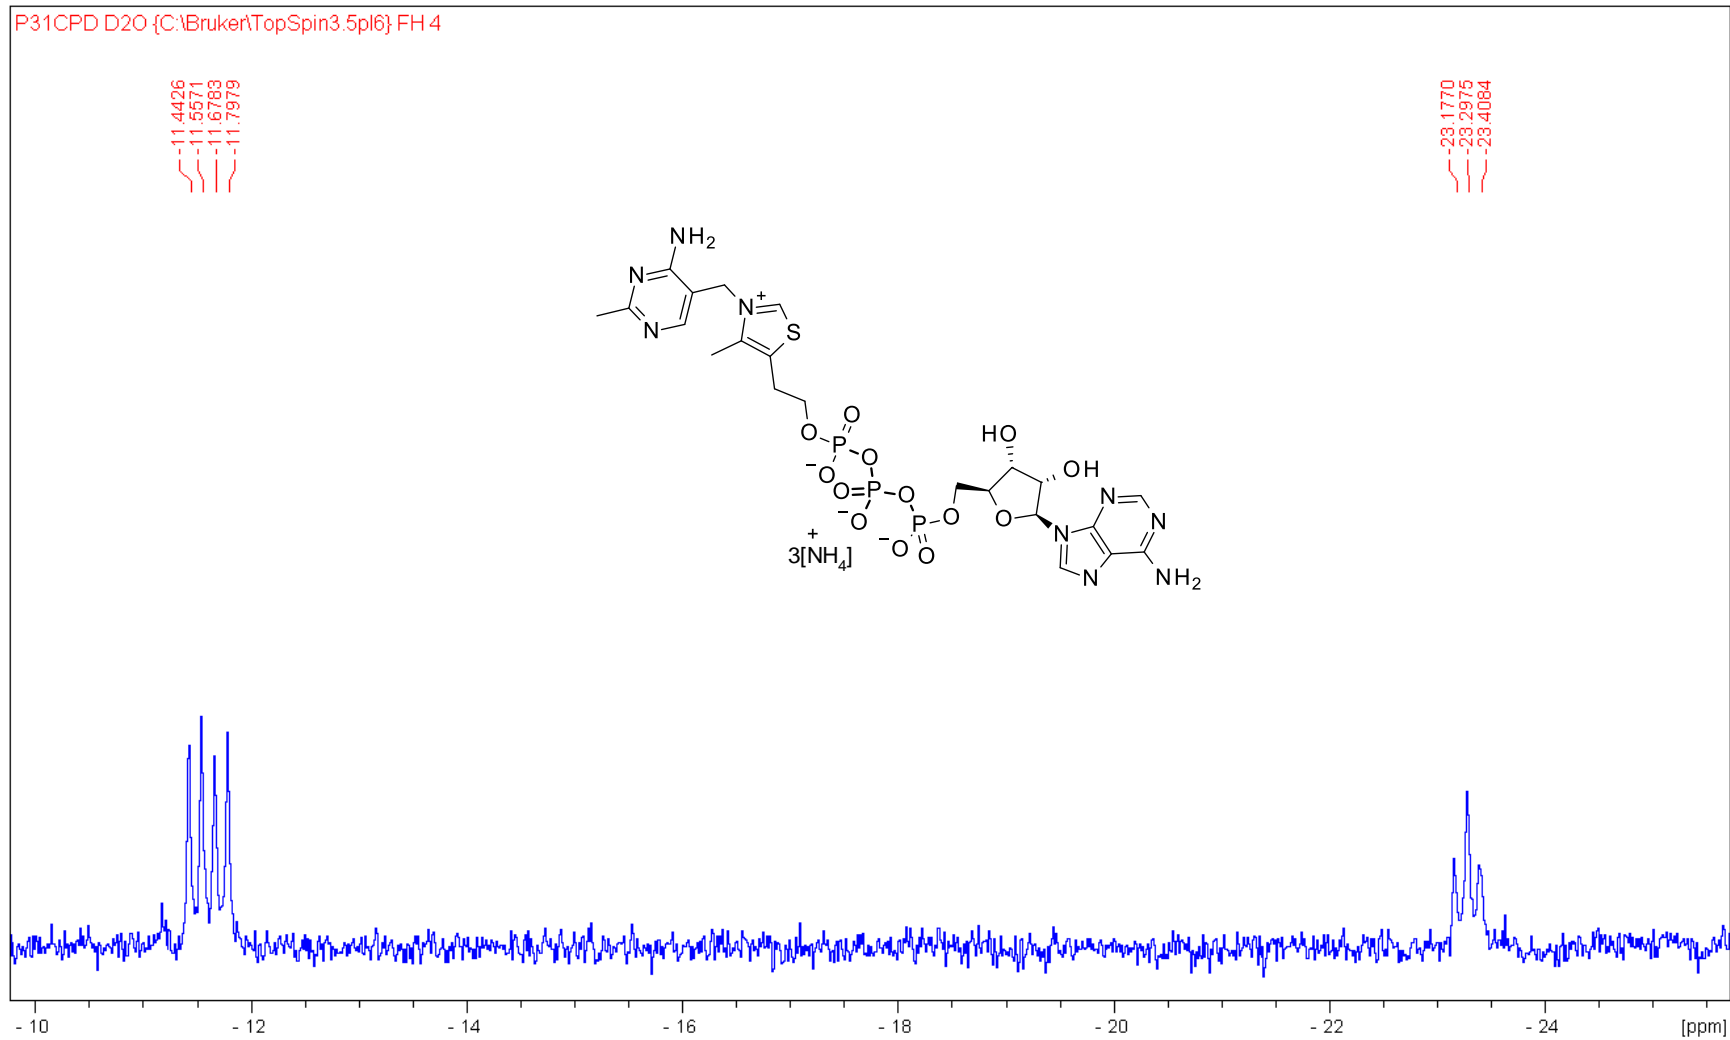

**Compound 37.** 162 MHz  $^{31}\text{P}$  NMR spectrum in  $\text{D}_2\text{O}$

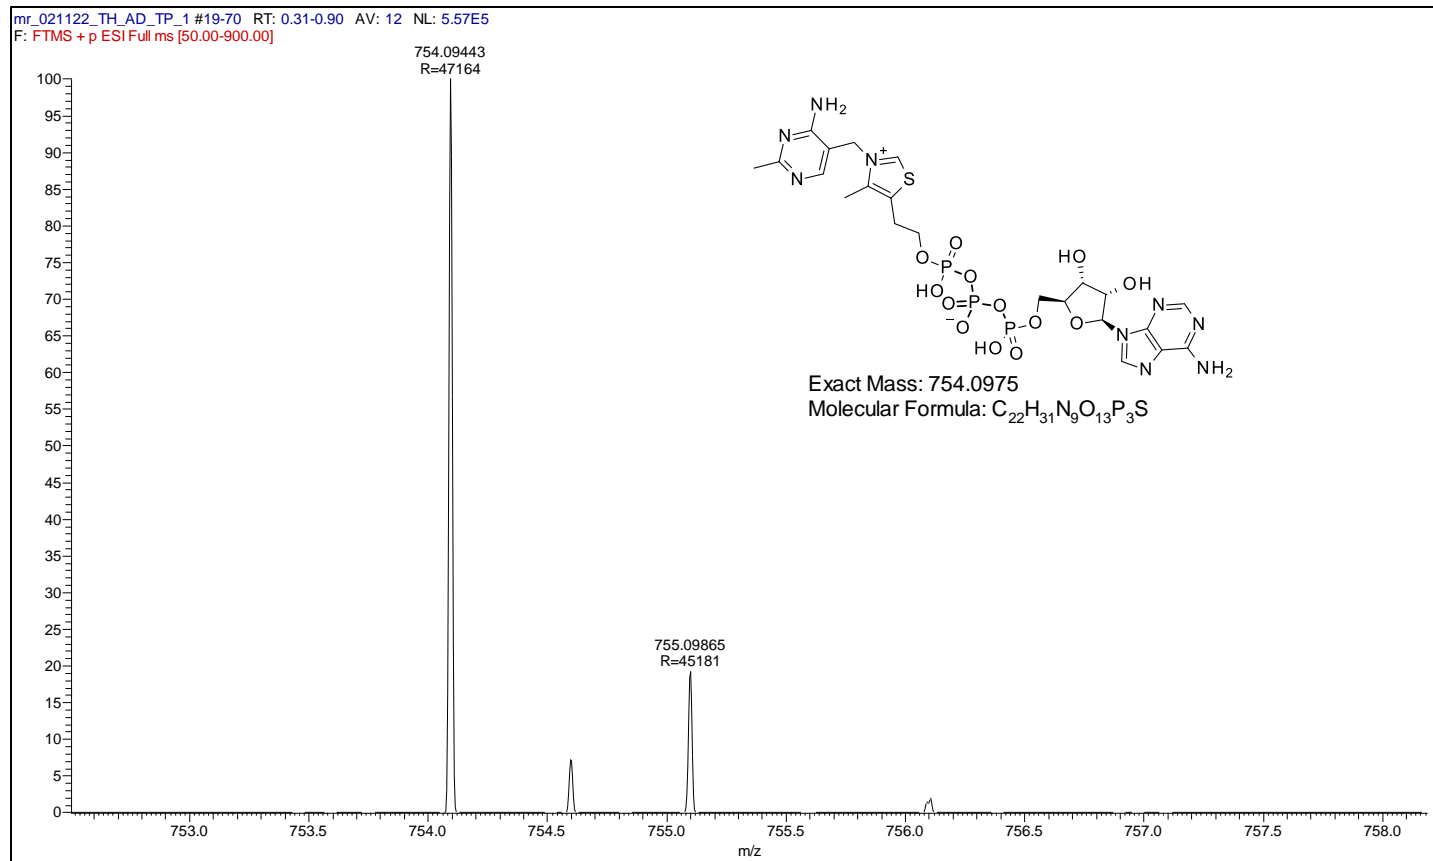

Compound 37. HRMS spectra



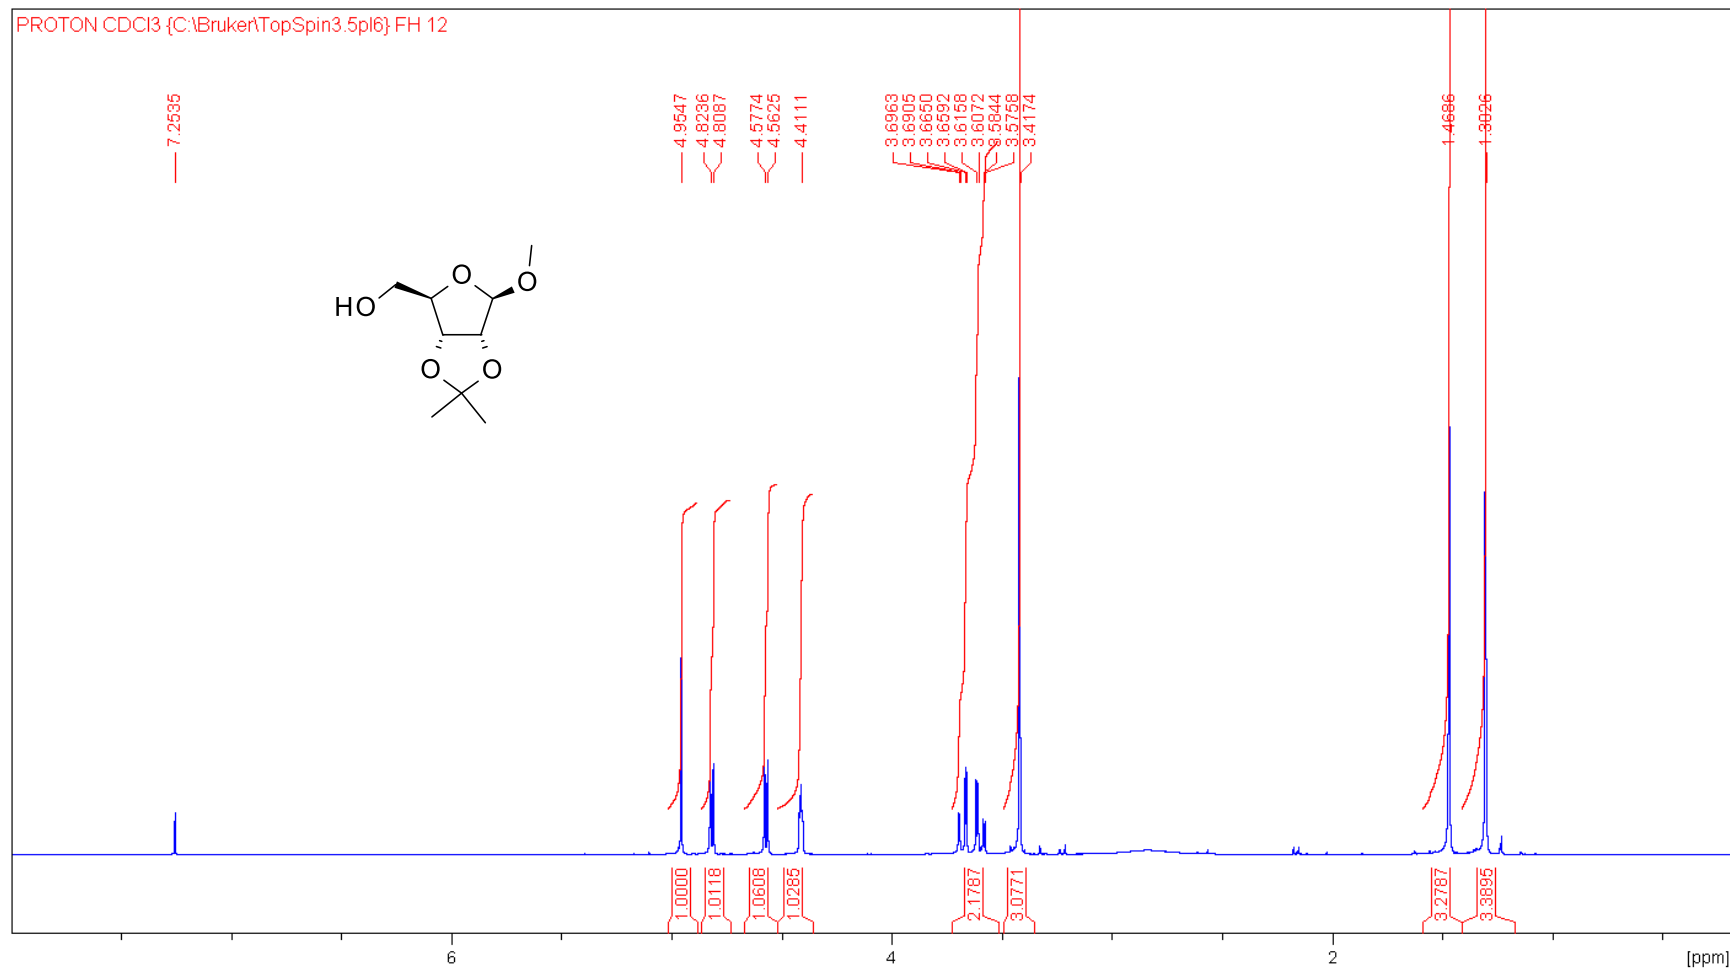

Compound 39. 400 MHz <sup>1</sup>H NMR spectrum in CDCl<sub>3</sub>

C13CPD CDCl3 {C:\Bruker\TopSpin3.5pl6} FH 20

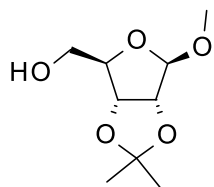

112.0738  
109.9401

88.3106  
85.7712

81.4427  
77.3203  
77.0081  
76.6847

63.9519

55.4571

26.3065  
24.6592

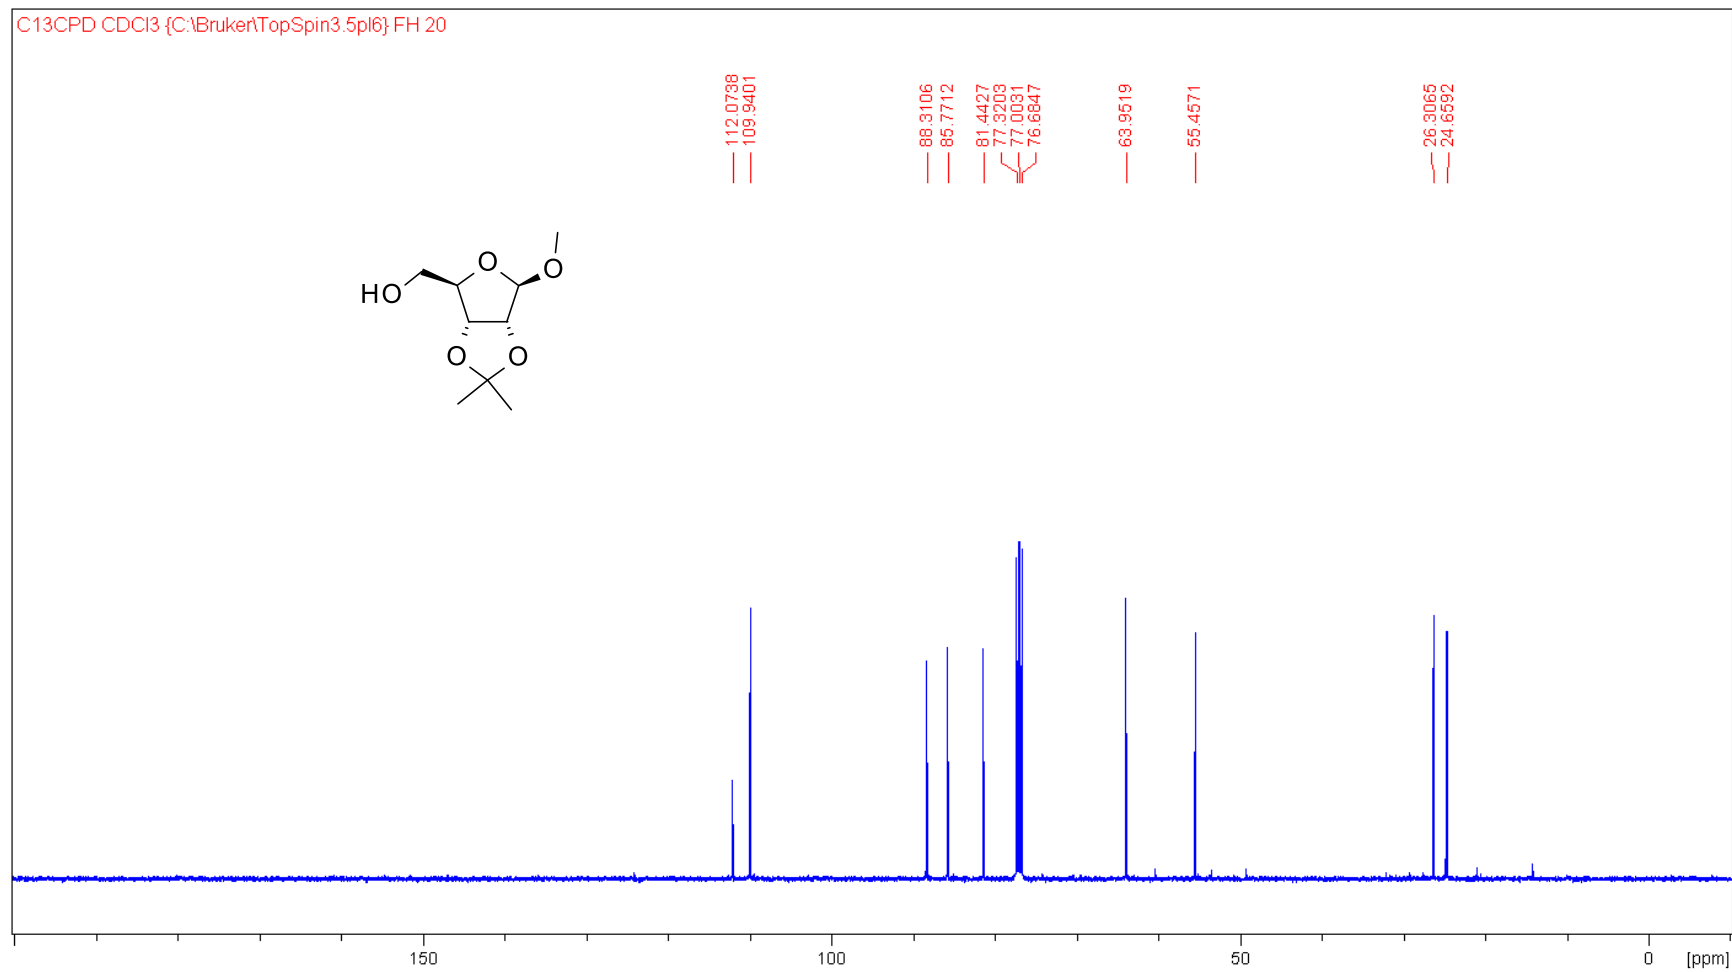

Compound 39. 100 MHz  $^{31}\text{C}$  NMR spectrum in  $\text{CDCl}_3$

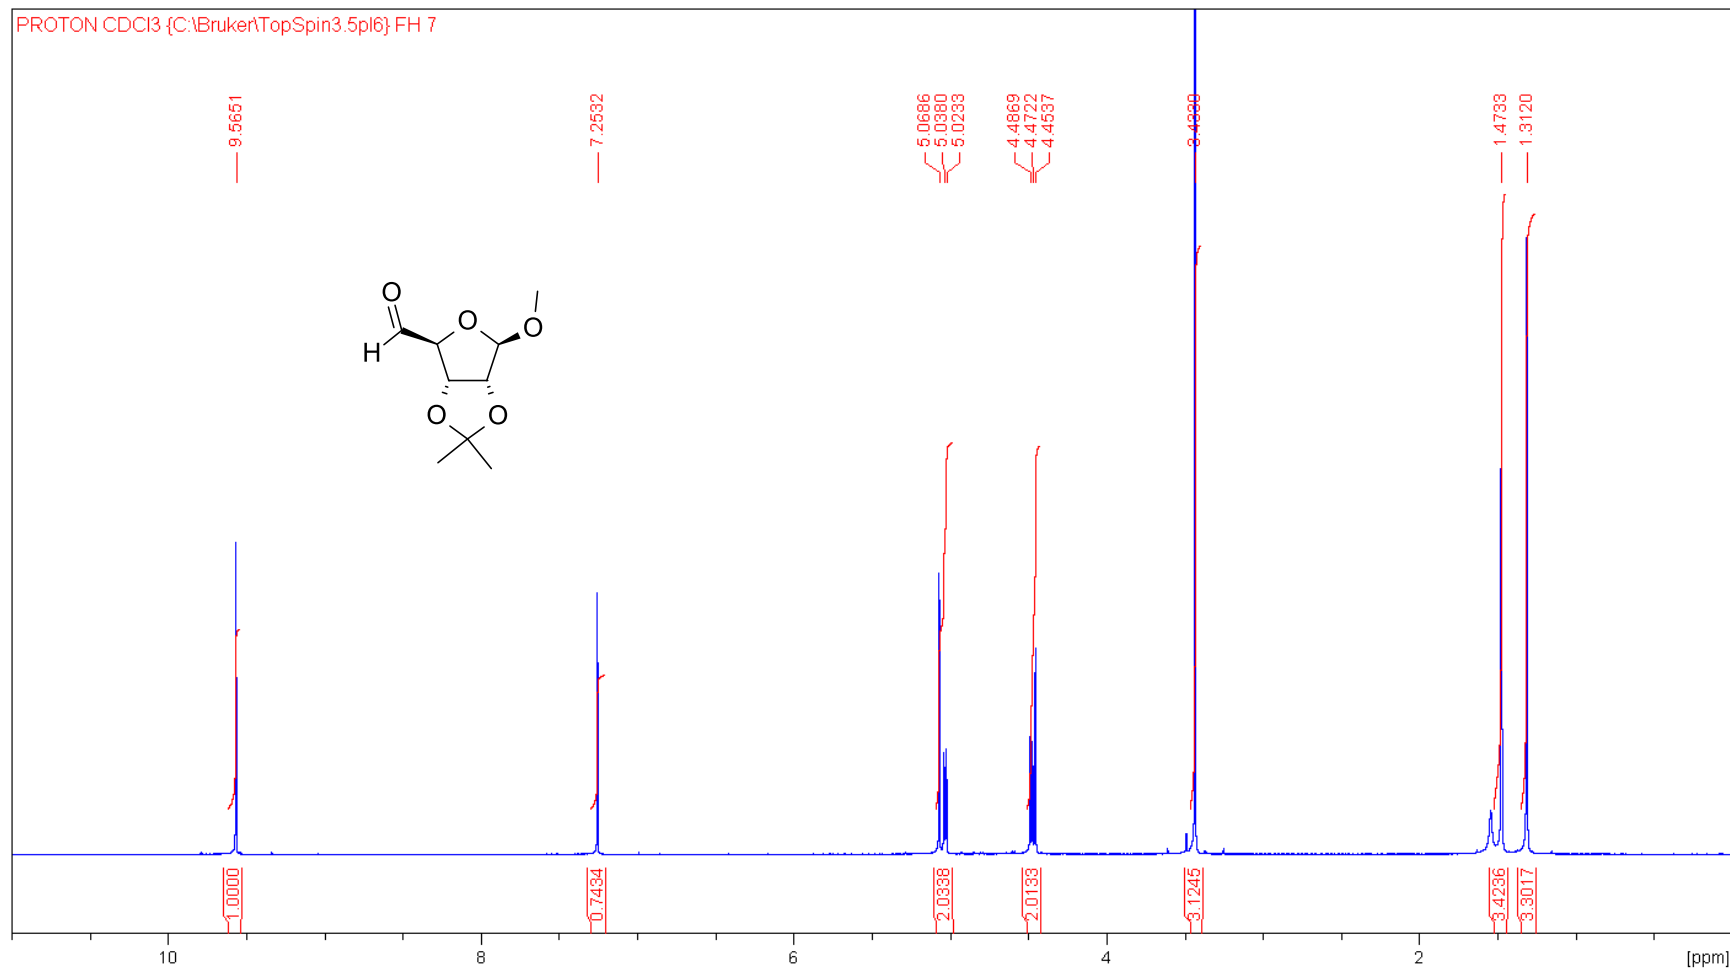

Compound 39. 400 MHz <sup>1</sup>H NMR spectrum in CDCl<sub>3</sub>

C13CPD CDCl3 {C:\Bruker\TopSpin3.5pl6} FH 7

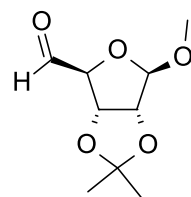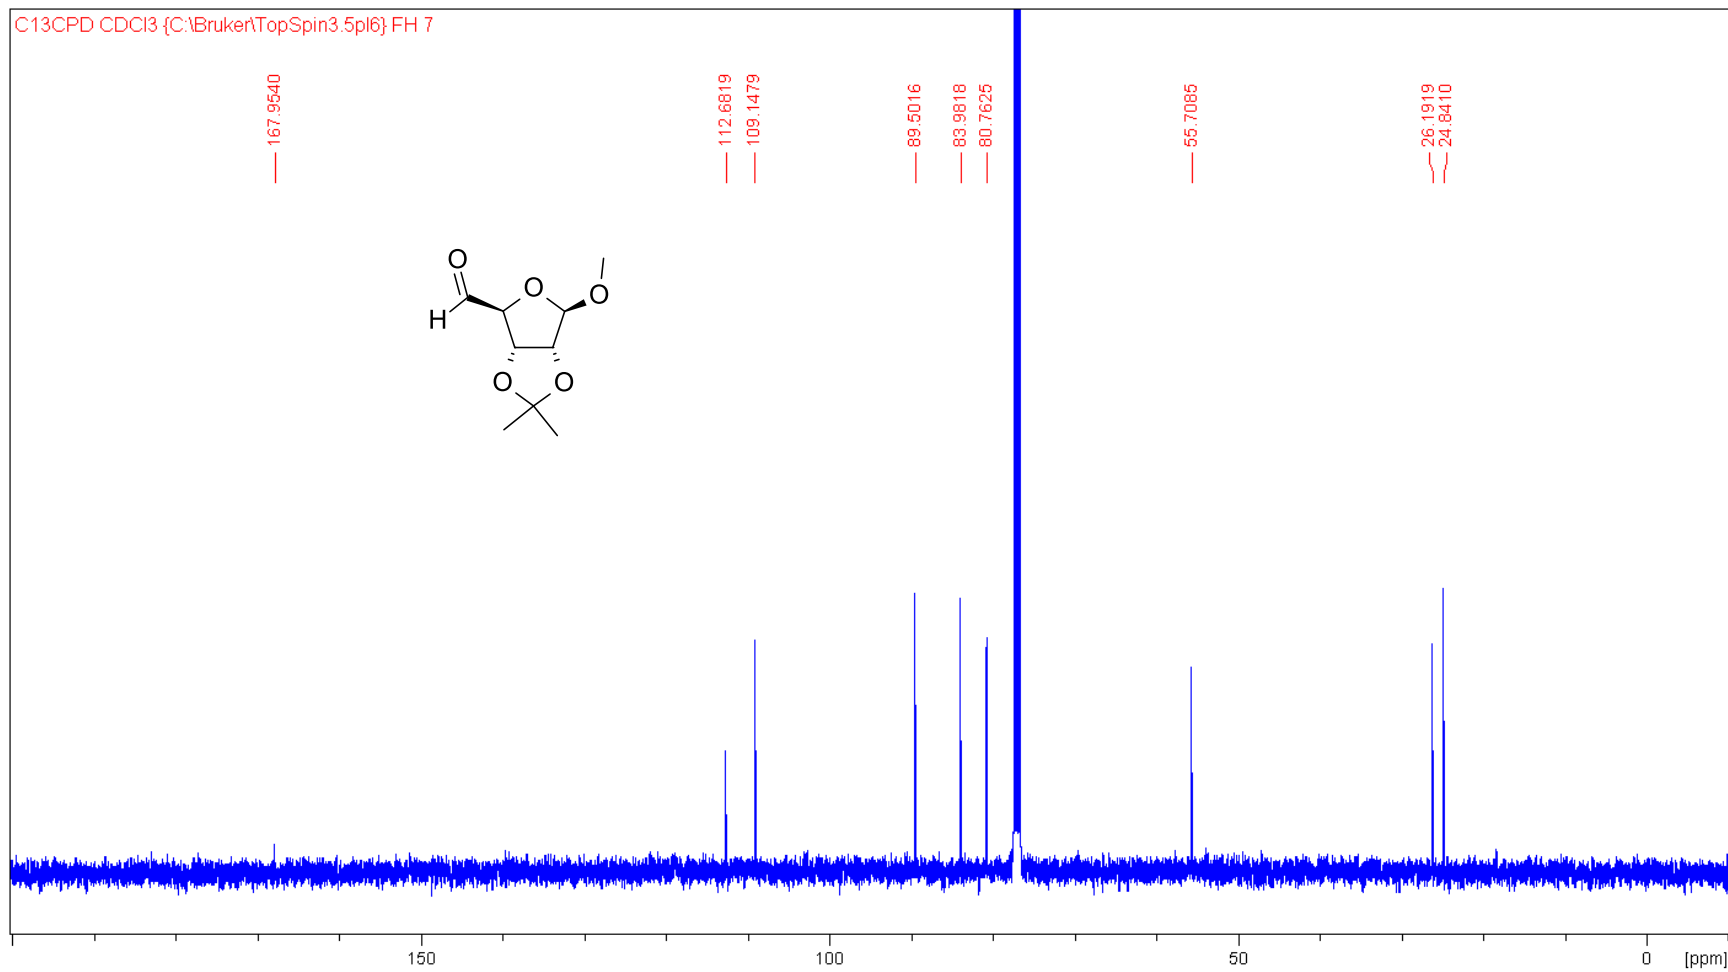

Compound 40. 100 MHz  $^{31}\text{C}$  NMR spectrum in  $\text{CDCl}_3$

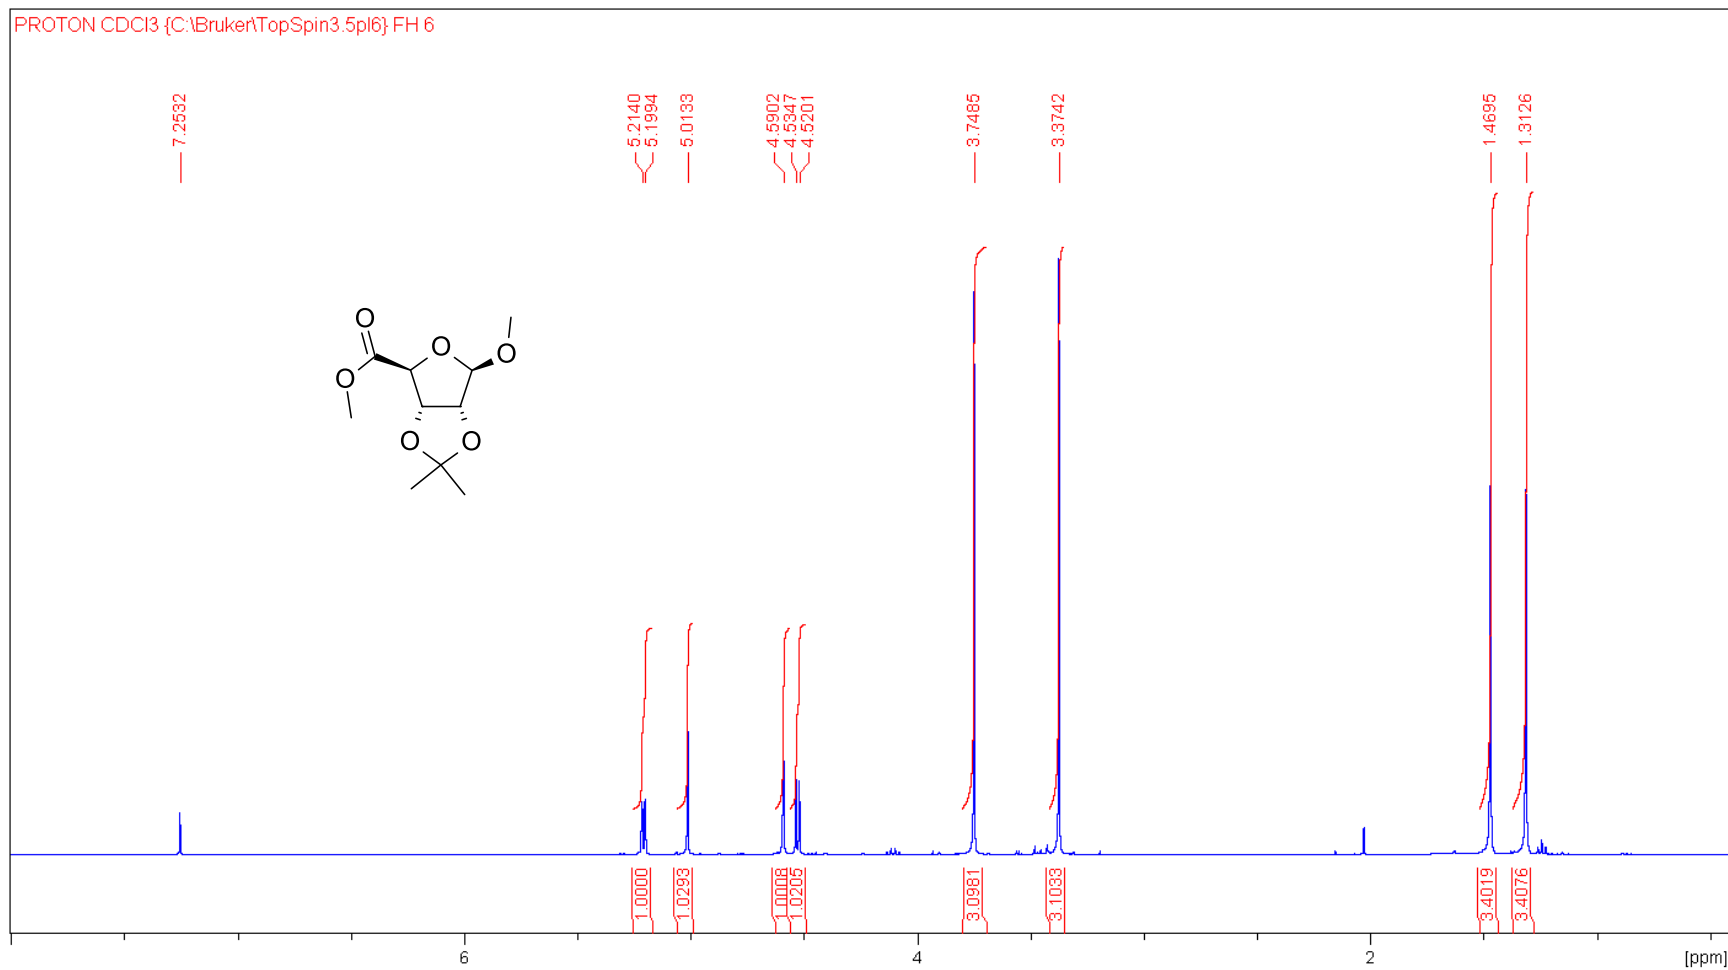

Compound 41. 400 MHz <sup>1</sup>H NMR spectrum in CDCl<sub>3</sub>

C13CPD CDCl3 {C:\Bruker\TopSpin3.5pl6} FH 6

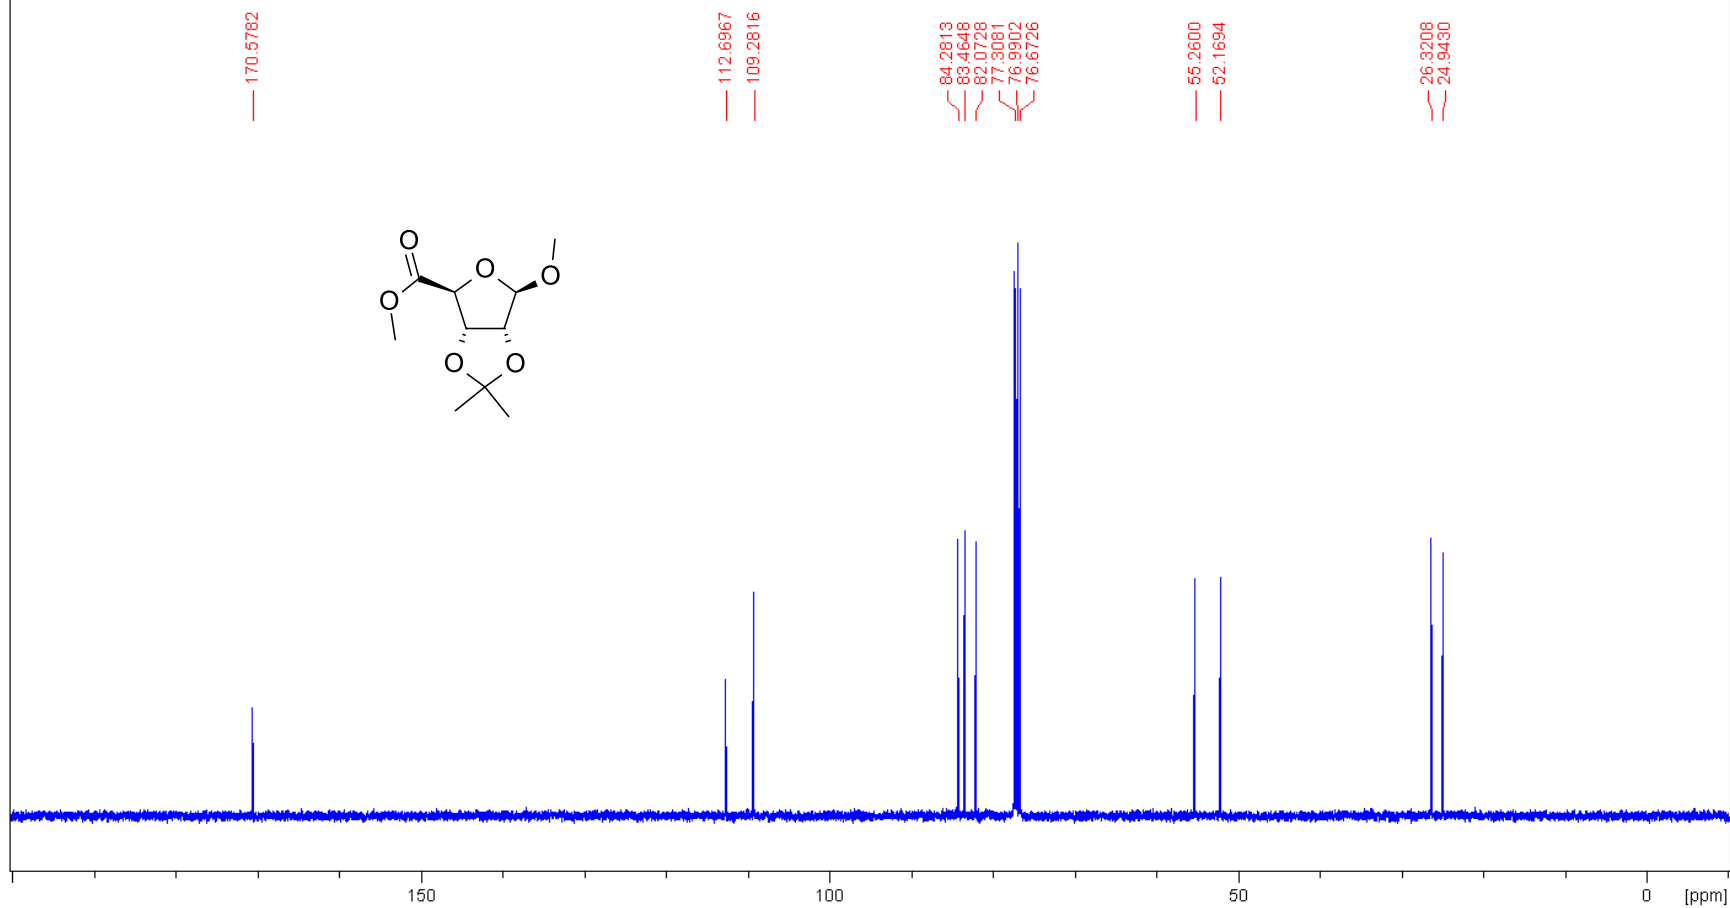

Compound 41. 100 MHz  $^{31}\text{C}$  NMR spectrum in  $\text{CDCl}_3$

PROTON CDCl3 {C:\Bruker\TopSpin3.5pl6} FH 15

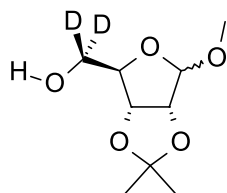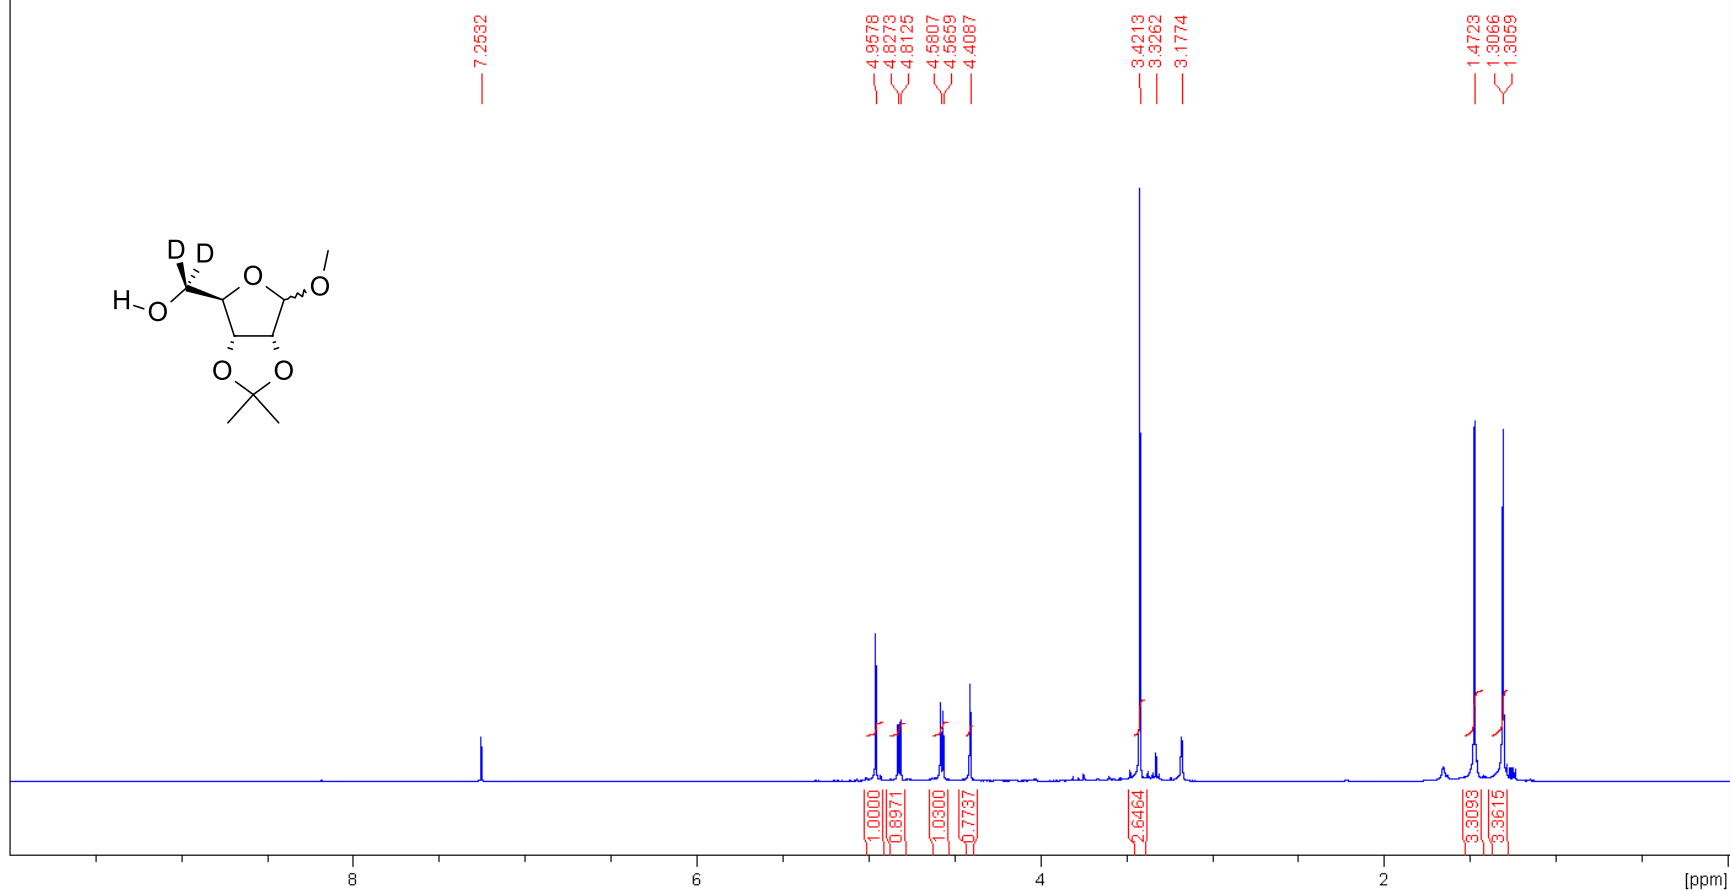

Compound 42. 400 MHz <sup>1</sup>H NMR spectrum in CDCl<sub>3</sub>

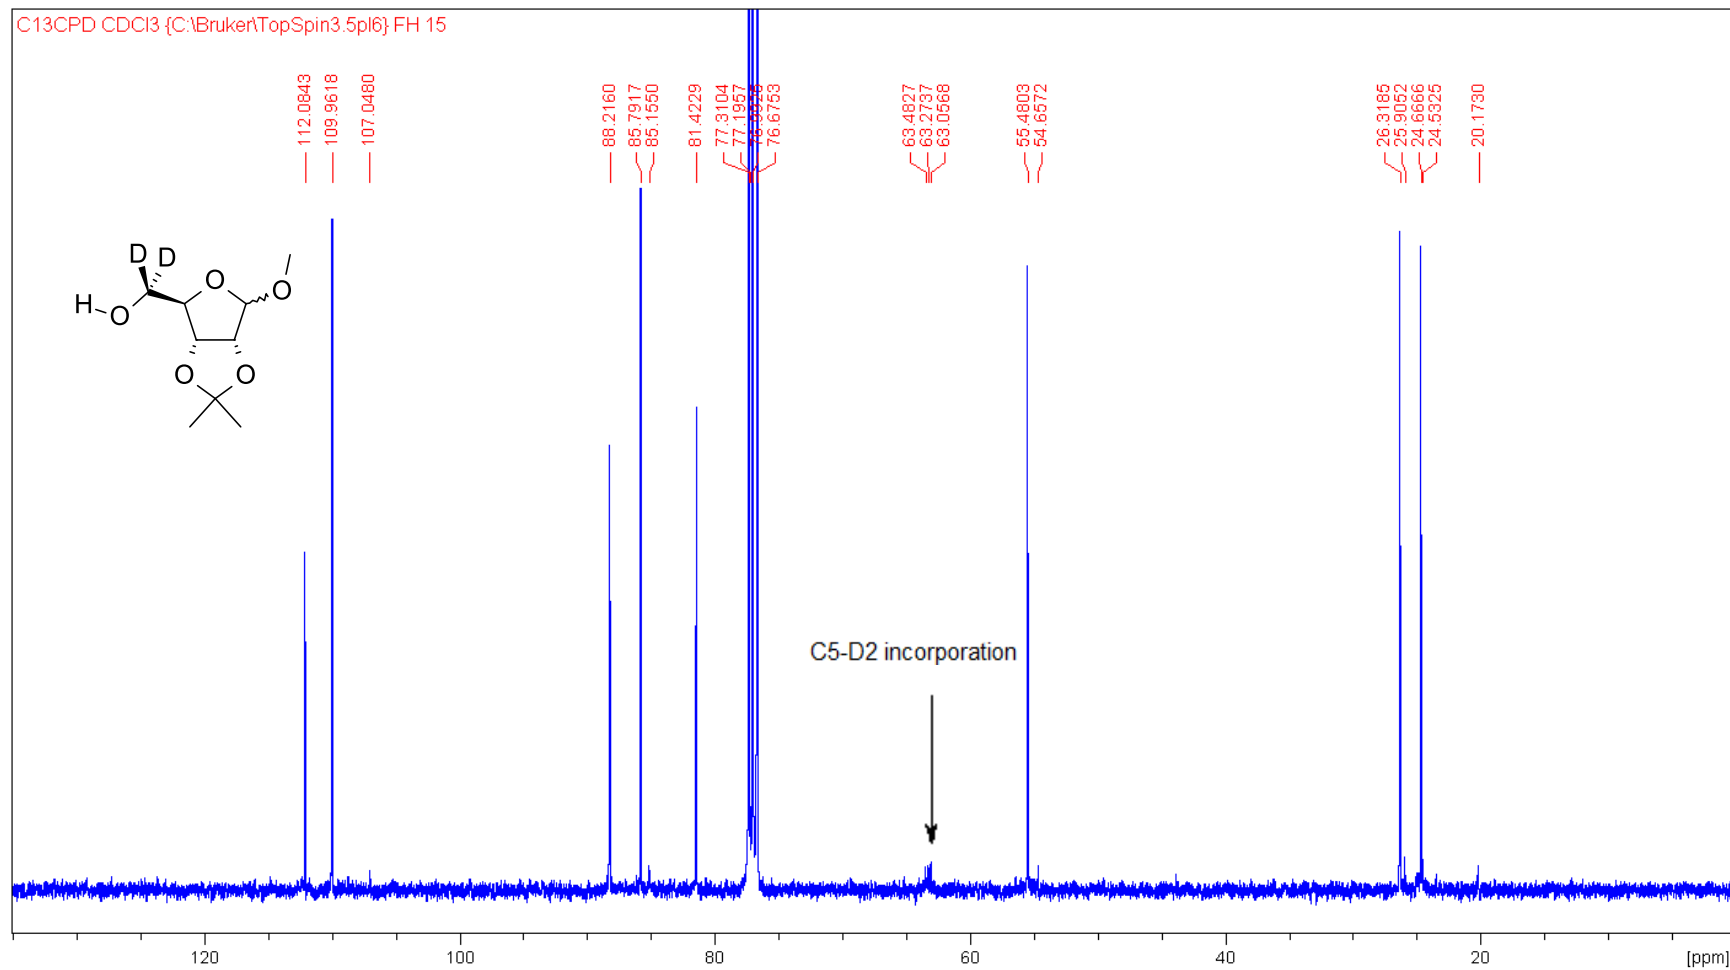

Compound 42. 100 MHz  $^{31}\text{C}$  NMR spectrum in  $\text{CDCl}_3$



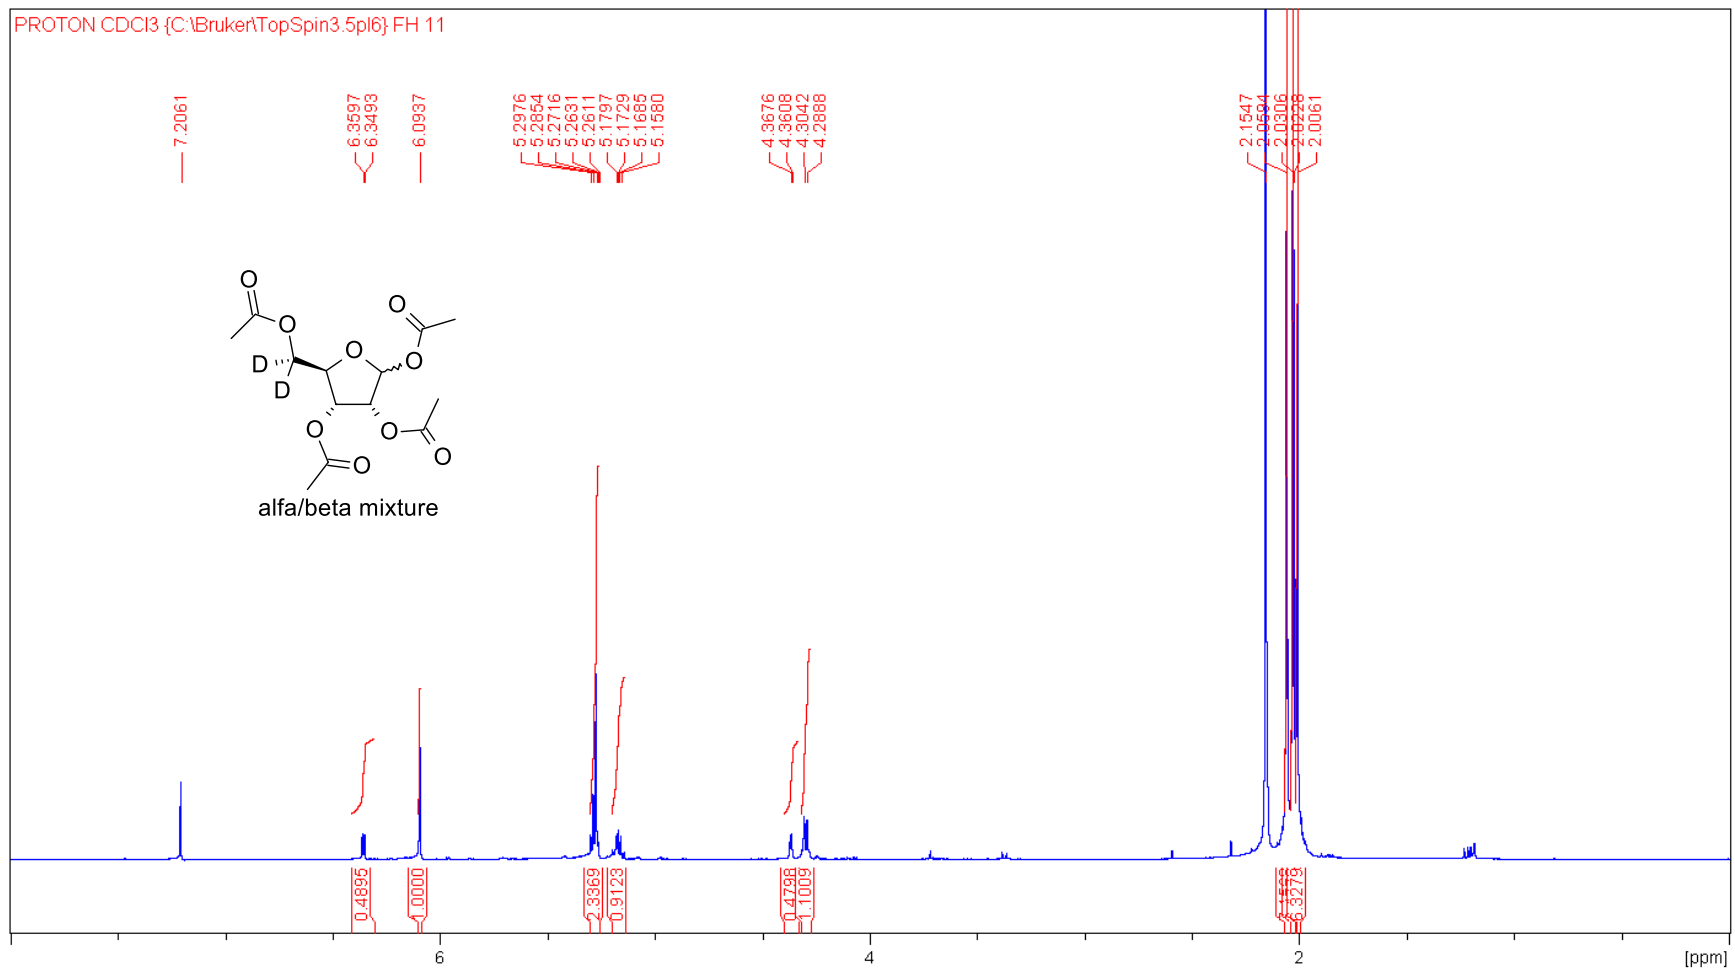

Compound 46. 400 MHz <sup>1</sup>H NMR spectrum in CDCl<sub>3</sub>

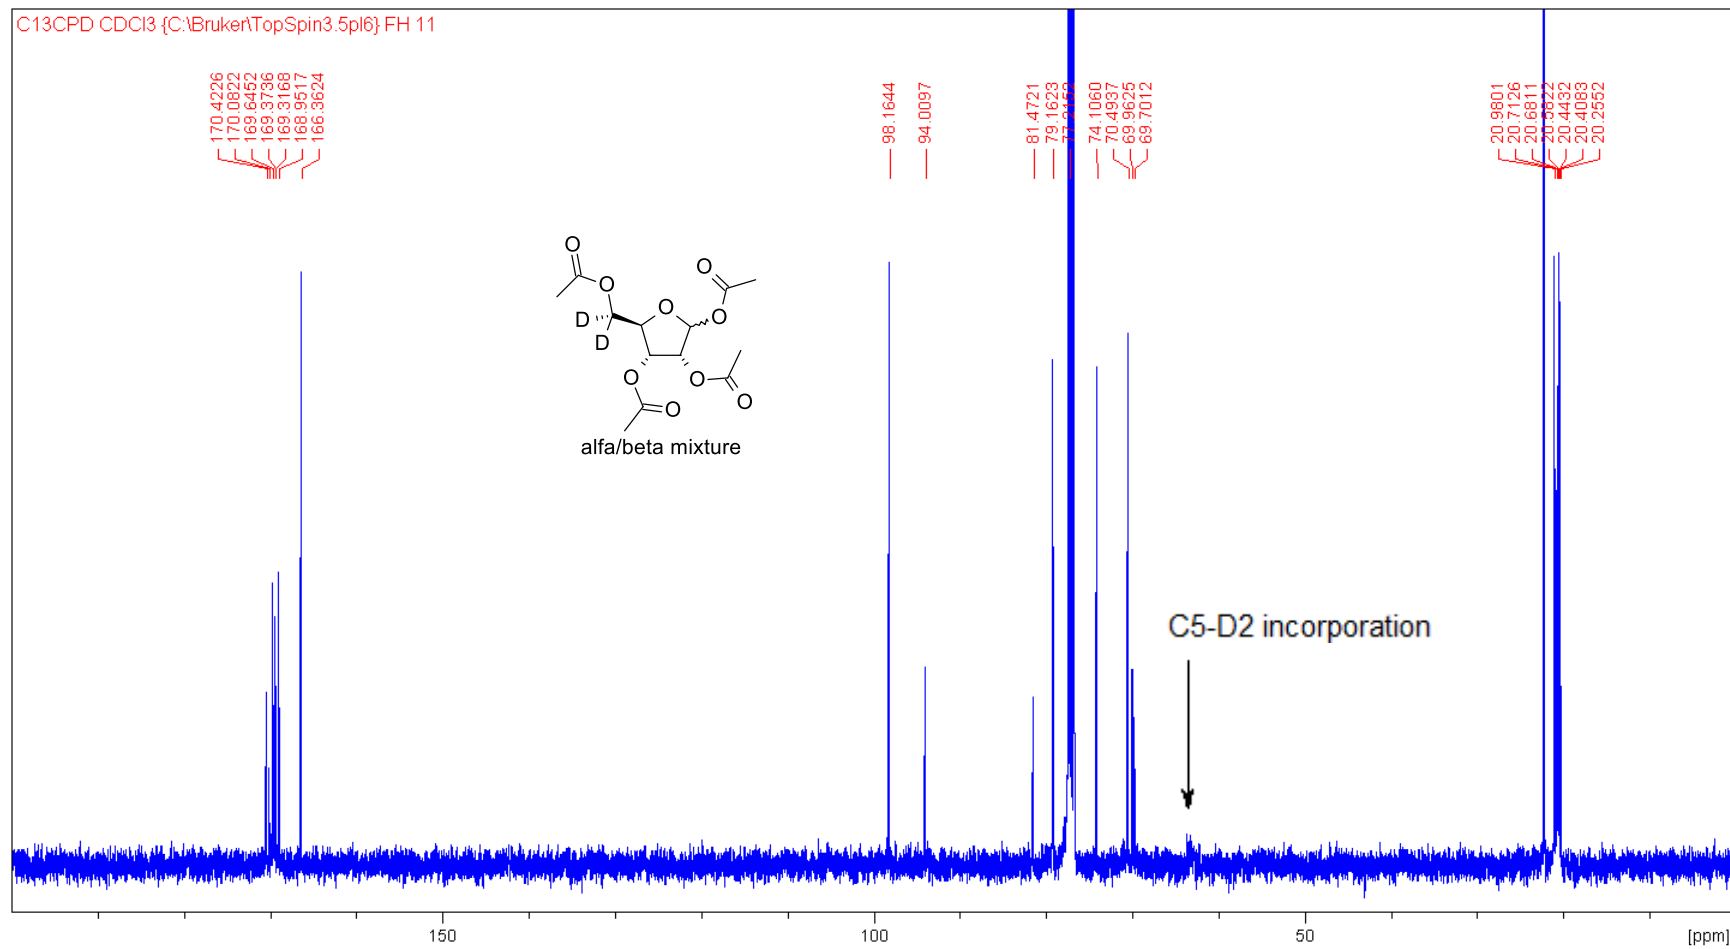

Compound 46. 100 MHz  $^{31}\text{C}$  NMR spectrum in  $\text{CDCl}_3$

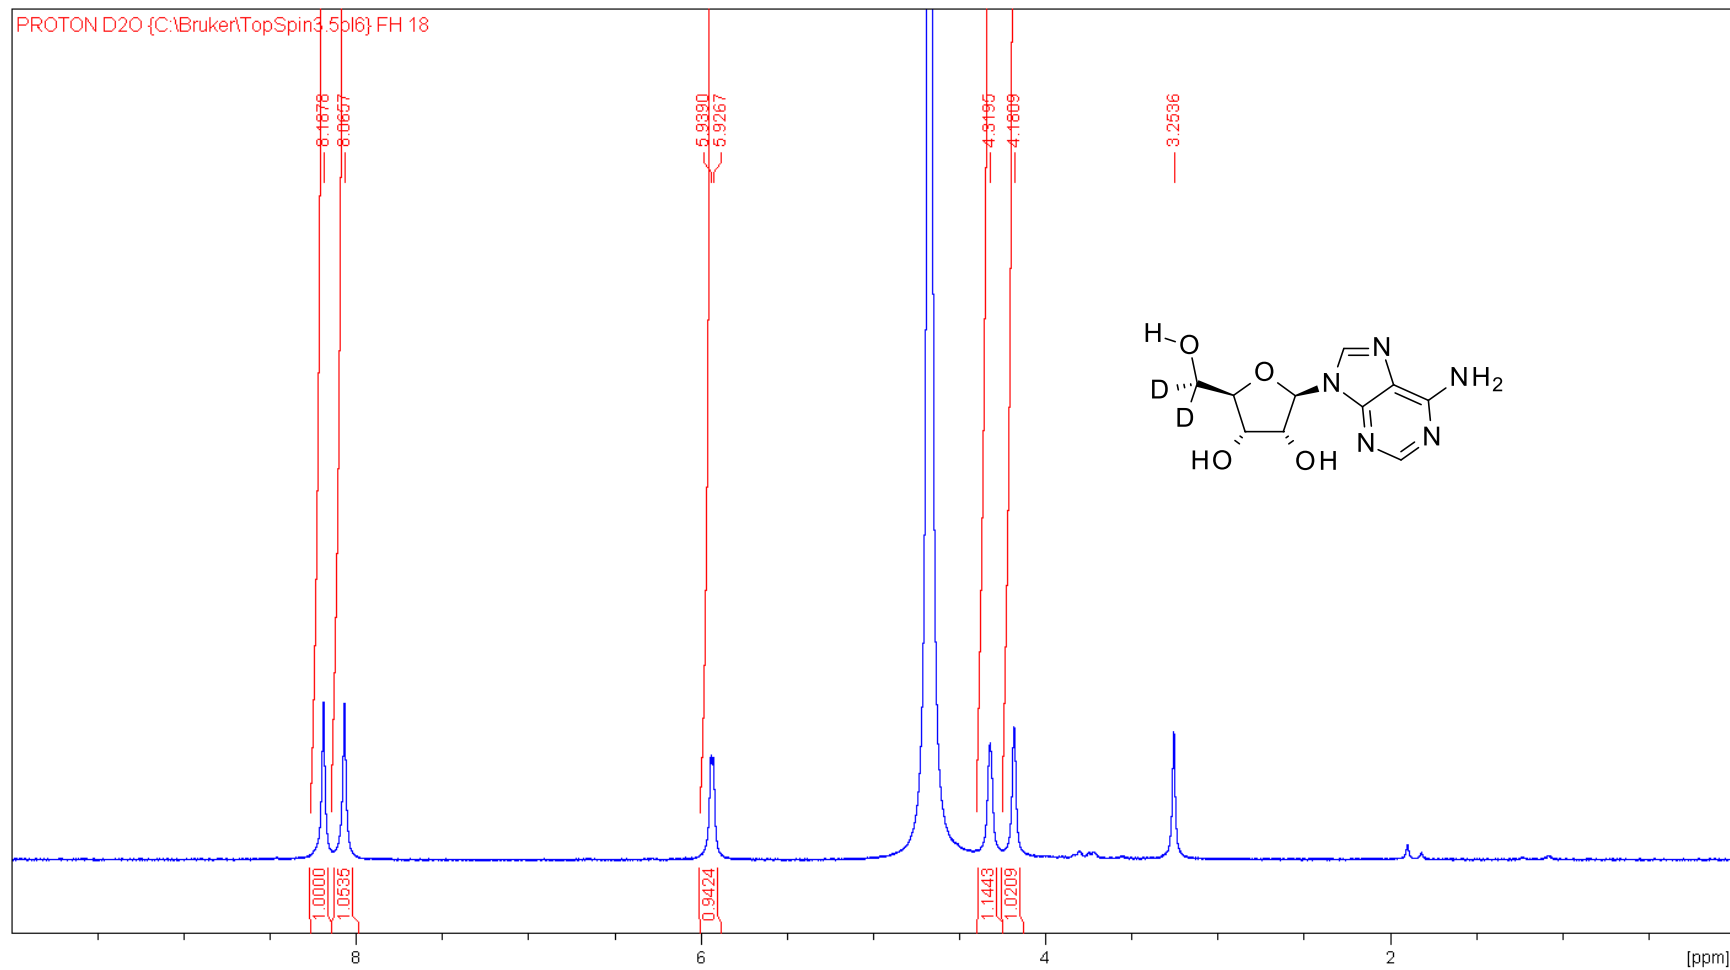

Compound 48. 400 MHz  $^1\text{H}$  NMR spectrum in  $\text{D}_2\text{O}$

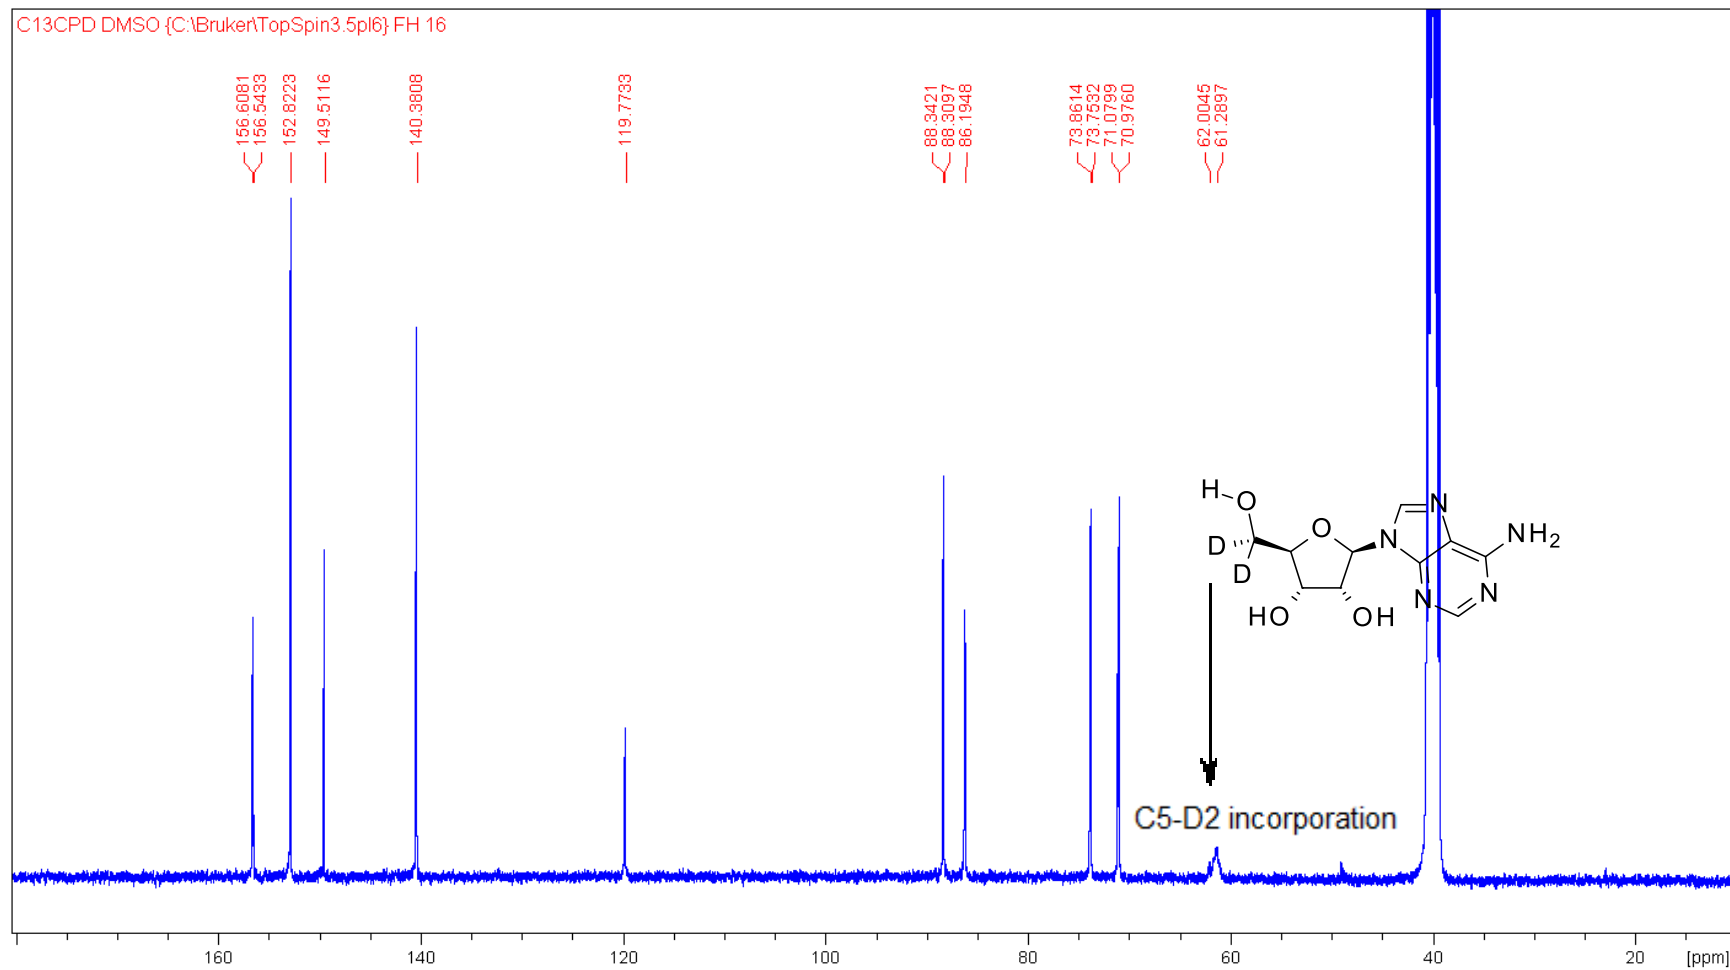

Compound 48. 100 MHz  $^{13}\text{C}$  NMR spectrum in  $\text{D}_2\text{O}$

mm\_031320\_c\_5\_deuterated\_adenosine\_1 #107-377 RT: 0.47-1.65 AV: 271 NL: 8.27E8

T: FTMS + p ESI Full ms [100.0000-600.0000]

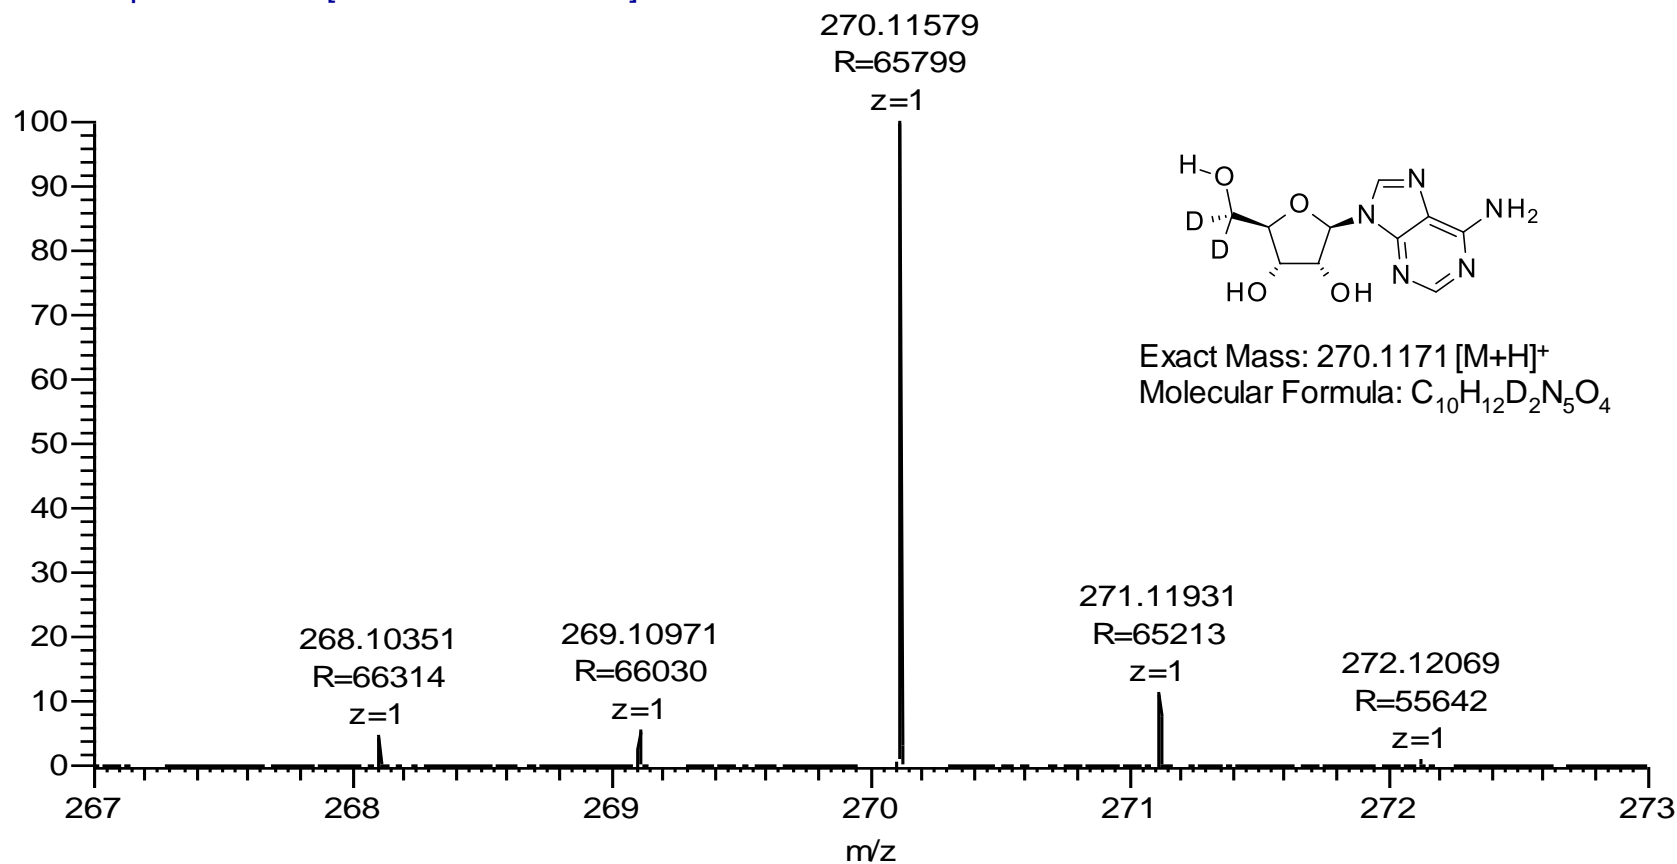

Compound 48. HRMS Spectra

P31CPD D2O {C:\Bruker\TopSpin3.5pl6} FH 16

3.0013  
0.1826  
-0.0176

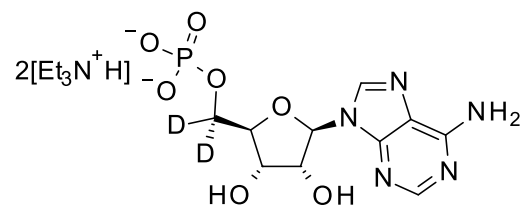

Crude C-5 deuterated AMP. triethylamine salt

Inorganic phosphate

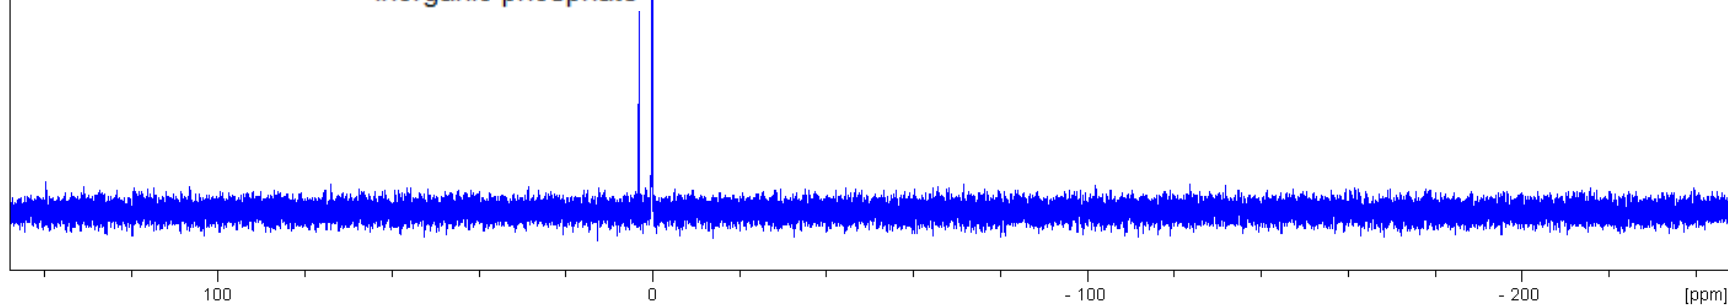

Compound 49. 162 MHz  $^{31}\text{P}$  NMR spectrum in  $\text{D}_2\text{O}$

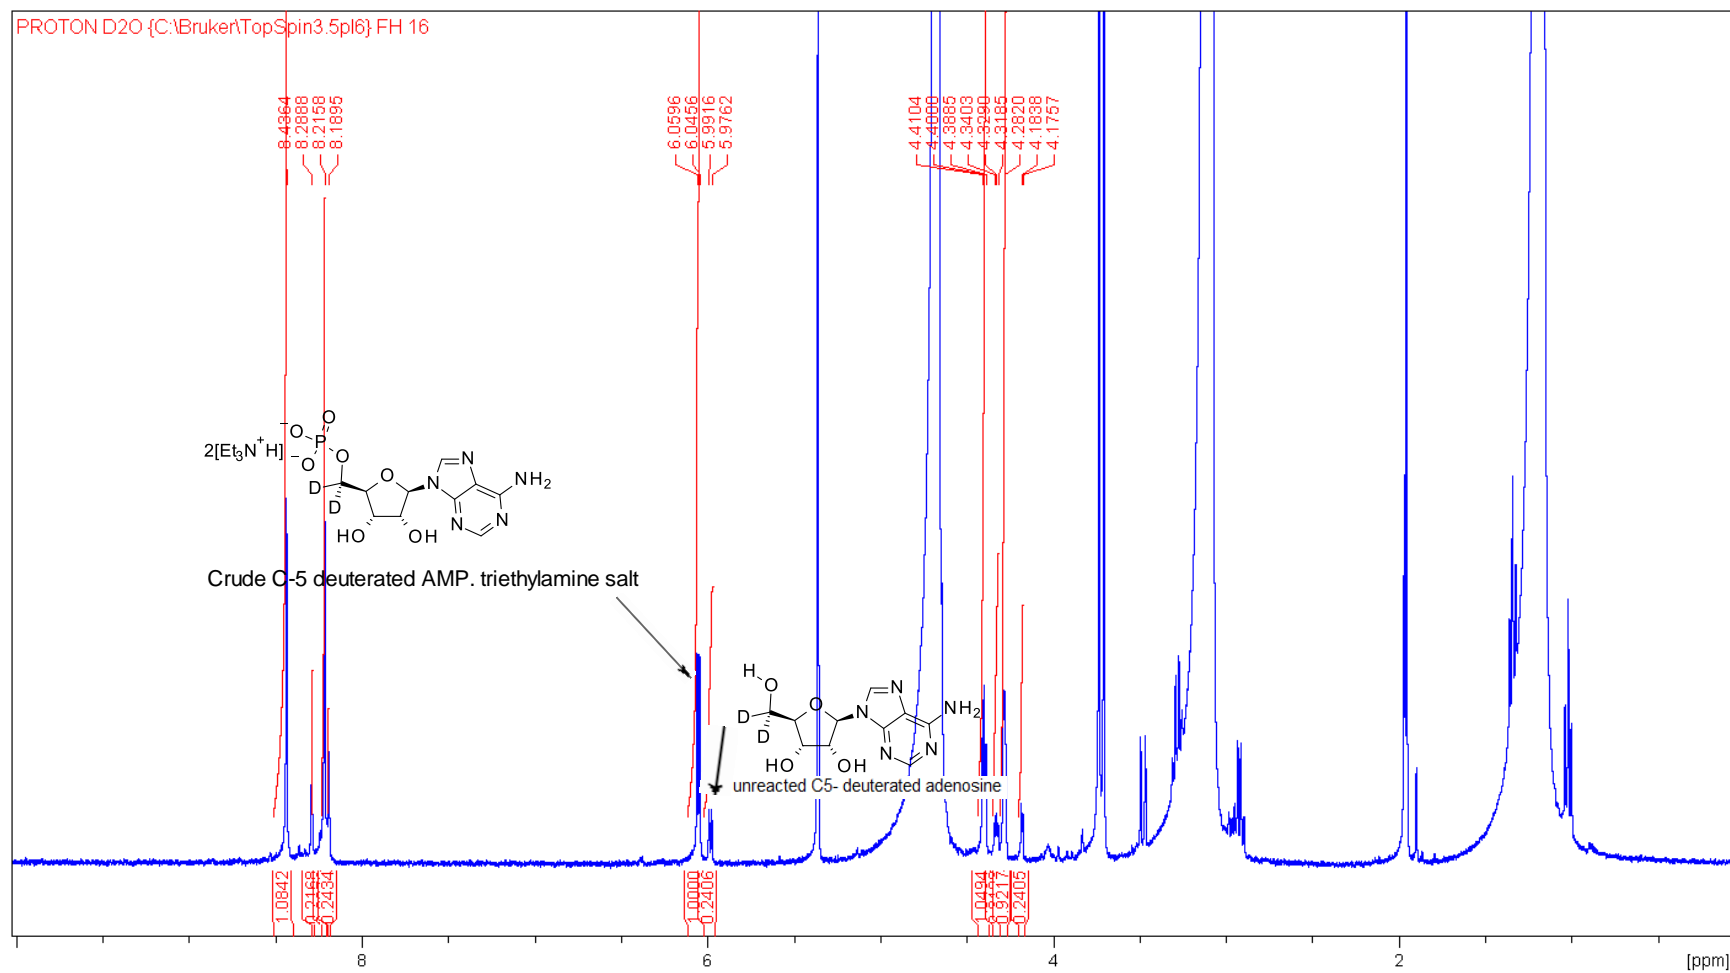

Compound 49. 400 MHz  $^1\text{H}$  NMR spectrum in  $\text{D}_2\text{O}$

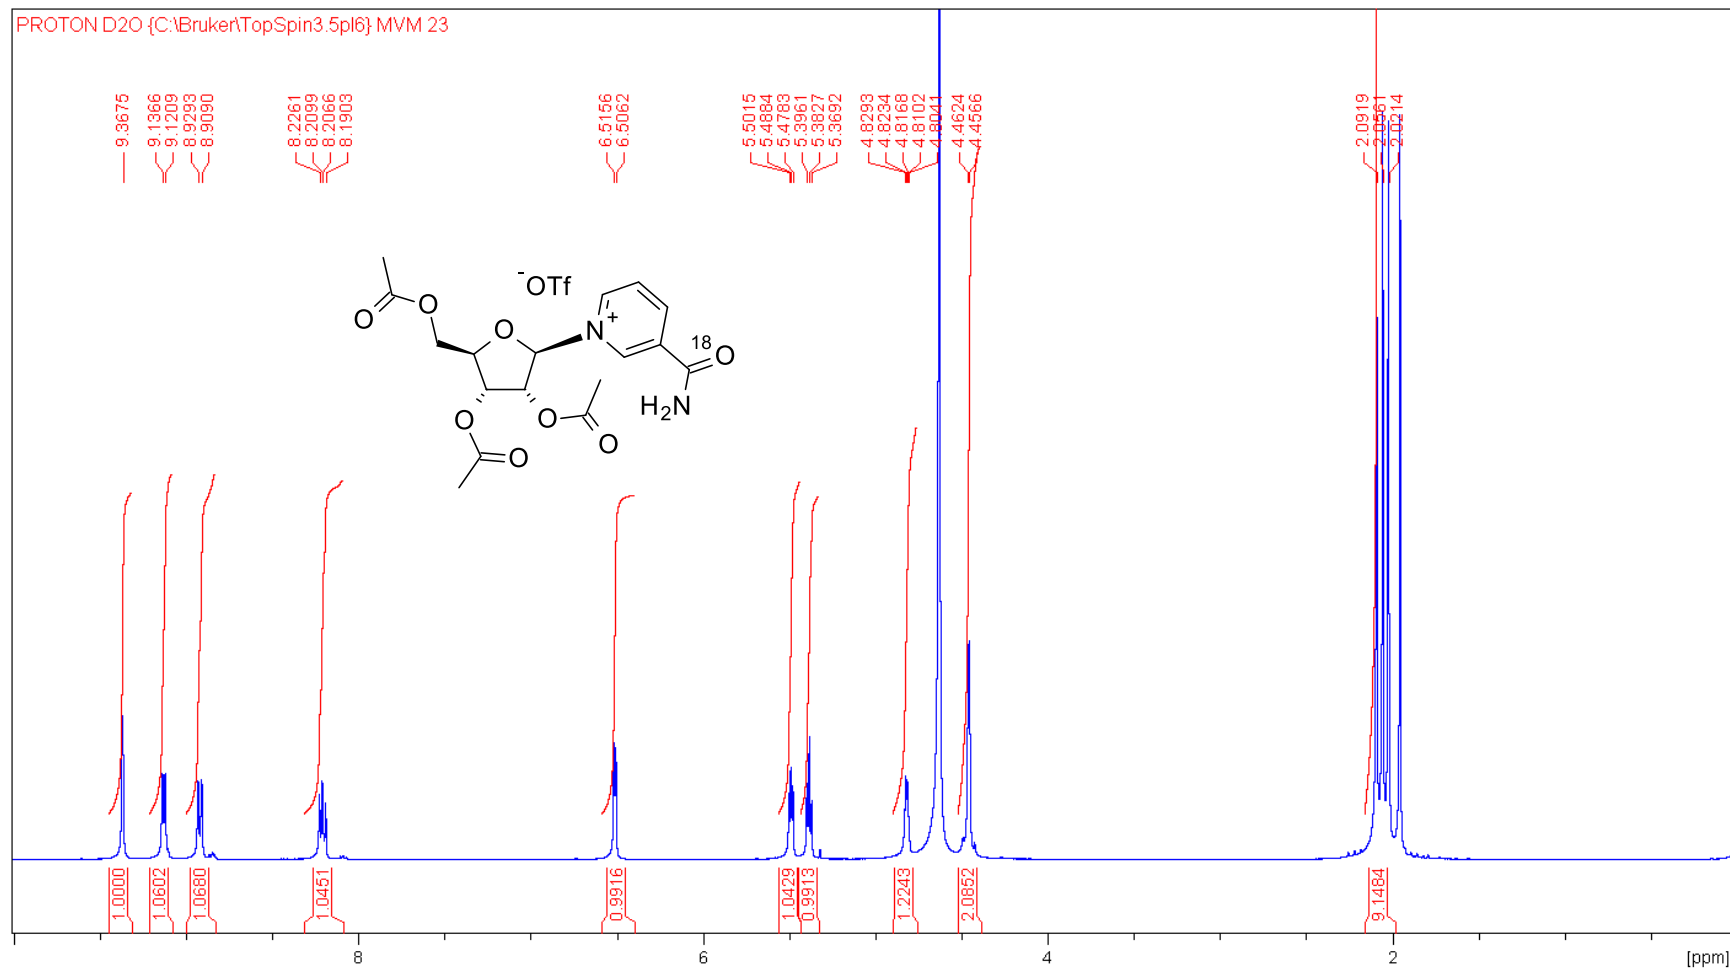

Compound 53. 400 MHz  $^1\text{H}$  NMR spectrum in  $\text{D}_2\text{O}$



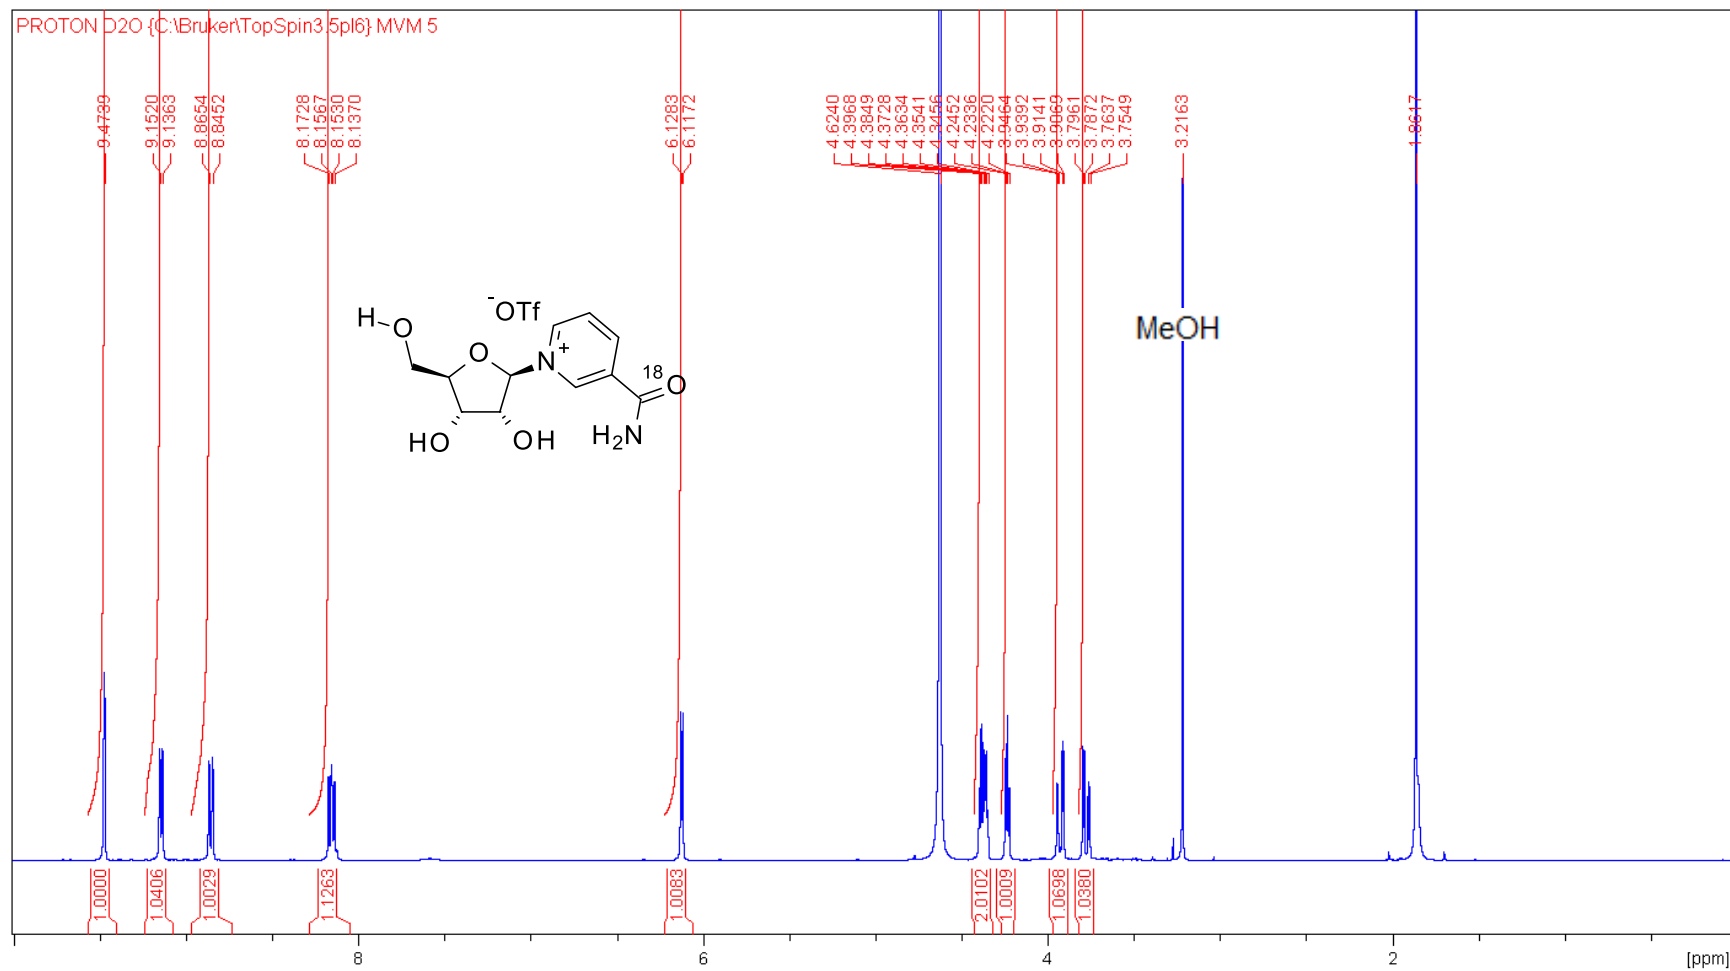

Compound 54. 400 MHz  $^1\text{H}$  NMR spectrum in  $\text{D}_2\text{O}$

F19CPD D2O {C:\Bruker\TopSpin3.5pl6} FH 1

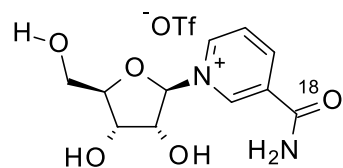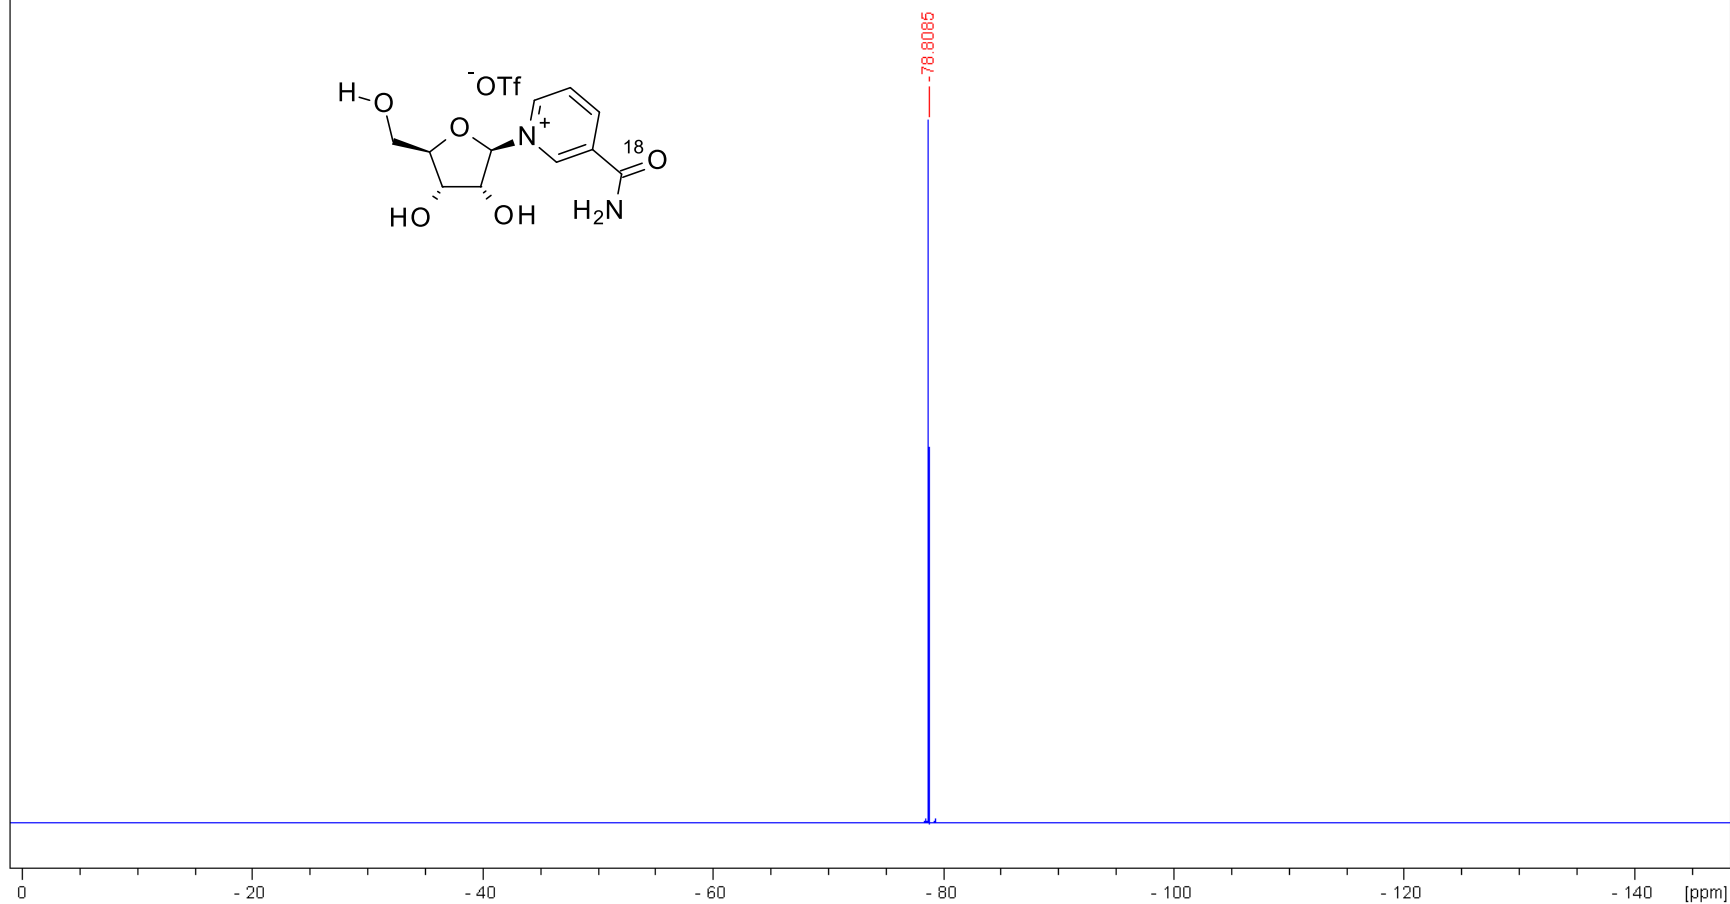

Compound 54. 377 MHz <sup>19</sup>F NMR spectrum in D<sub>2</sub>O
